1 **Addiction-associated genetic variants implicate brain cell type- and region-specific cis-**  
2 **regulatory elements in addiction neurobiology**

3 Chaitanya Srinivasan<sup>1\*</sup>, BaDoi N. Phan<sup>1,2\*</sup>, Alyssa J. Lawler<sup>3</sup>, Easwaran Ramamurthy<sup>1</sup>, Michael  
4 Kleyman<sup>1</sup>, Ashley R. Brown<sup>1</sup>, Irene M. Kaplow<sup>1,4</sup>, Morgan E. Wirthlin<sup>1,4</sup>, Andreas R. Pfenning  
5 <sup>1,3,4,‡</sup>

6  
7 <sup>1</sup>Computational Biology Department, School of Computer Science, Carnegie Mellon University,  
8 15213

9 <sup>2</sup>Medical Scientist Training Program, School of Medicine, University of Pittsburgh, 15213

10 <sup>3</sup>Department of Biological Sciences, Mellon College of Science, Carnegie Mellon University,  
11 15213

12 <sup>4</sup>Neuroscience Institute, Carnegie Mellon University, 15213

13 \*CS and BNP contributed equally to the work

14 ‡Direct correspondence to [apfenning@cmu.edu](mailto:apfenning@cmu.edu)

15

16 Number of pages: 54 pages of text, 13 pages of figures

17

18 Number of figures:

19 5 main figures

20 6 supplemental figures

21 1 supplemental table

22

23 Number of words

24 Abstract: 244 words

25 Introduction: 559 words

26 Discussion: 1347 words

27

28 **CONFLICT OF INTEREST:**

29 AJL, ER, and ARP are inventors of the cSNAIL patent. Other authors do not declare any conflict  
30 of interest.

31

32 **ACKNOWLEDGEMENT**

33 We would like to thank members of the Eric Yttri lab at Carnegie Mellon University for providing  
34 *Drd1-cre* and *Adora2a-cre* mice for cell type-specific ATAC-seq experiments.

35 Author contributions: Conceptualization: ARP, BNP, CS; ATAC-seq data processing: AJL, ER,  
36 IMK, BNP; GWAS enrichment investigation: BNP, CS, ER, MK; Machine learning models: AJL,  
37 BNP, ER, IMK; bulk tissue ATAC-seq: AJL, ARB, MEW; cSNAIL ATAC-seq: AJL, ARB;  
38 writing (original draft): BNP, CS; review and editing: AJL, ARP, BNP, CS, ER, IMK; funding  
39 acquisition, resources, & supervision: ARP;

40 Funding: National Institute of General Medical Sciences training grant T32GM008208 (BNP),  
41 Sloan Foundation Fellowship (ARP), National Institute on Drug Abuse Avenir Award  
42 1DP1DA046585 (ARP), National Science Foundation Graduate Student Research Fellowship  
43 DGE1745016 (AJL), Carnegie Mellon Brainhub Presidential Fellowship (ER), Carnegie Mellon  
44 Computational Biology Department Lane Postdoctoral Fellowship (IMK)

45 **ABSTRACT**

46 Recent large genome-wide association studies (GWAS) have identified multiple confident risk  
47 loci linked to addiction-associated behavioral traits. Genetic variants linked to addiction-  
48 associated traits lie largely in non-coding regions of the genome, likely disrupting cis-regulatory  
49 element (CRE) function. CREs tend to be highly cell type-specific and may contribute to the  
50 functional development of the neural circuits underlying addiction. Yet, a systematic approach for  
51 predicting the impact of risk variants on the CREs of specific cell populations is lacking. To dissect  
52 the cell types and brain regions underlying addiction-associated traits, we applied LD score  
53 regression to compare GWAS to genomic regions collected from human and mouse assays for  
54 open chromatin, which is associated with CRE activity. We found enrichment of addiction-  
55 associated variants in putative regulatory elements marked by open chromatin in neuronal  
56 (NeuN+) nuclei collected from multiple prefrontal cortical areas and striatal regions known to play  
57 major roles in reward and addiction. To further dissect the cell type-specific basis of addiction-  
58 associated traits, we also identified enrichments in human orthologs of open chromatin regions of  
59 mouse neuron subtypes: cortical excitatory, PV, D1, and D2. Lastly, we developed machine  
60 learning models from mouse cell type-specific regions of open chromatin to further dissect human  
61 NeuN+ open chromatin regions into cortical excitatory or striatal D1 and D2 neurons and predict  
62 the functional impact of addiction-associated genetic variants. Our results suggest that different  
63 neuron subtypes within the reward system play distinct roles in the variety of traits that contribute  
64 to addiction.

65 **Significance Statement:**

66 Our study on cell types and brain regions contributing to heritability of addiction-associated traits  
67 suggests that the conserved non-coding regions within cortical excitatory and striatal medium

68 spiny neurons contribute to genetic predisposition for nicotine, alcohol, and cannabis use  
69 behaviors. This computational framework can flexibly integrate epigenomic data across species to  
70 screen for putative causal variants in a cell type- and tissue-specific manner across numerous  
71 complex traits.

## 72 INTRODUCTION

73 Substance use disorders (SUD) have increased in prevalence over the last three decades,  
74 with an estimated 100 million cases worldwide(GBD 2016 Alcohol and Drug Use Collaborators,  
75 2018; Eddie et al., 2019). Pharmacological interventions are limited in their ability to cure  
76 addiction due to physiological and logistical barriers(Pullen and Oser, 2014; Pear et al., 2019). As  
77 the societal epidemic of substance use grows, there is a greater need to understand the neurobiology  
78 of substance use behaviors and addiction.

79 The reward circuits co-opted in addiction are highly conserved across primates and  
80 rodents(Scaplen and Kaun, 2016). It is generally accepted that addictive substances promote  
81 impulsive and compulsive behavior by activating the mesolimbic dopamine system, in which  
82 dopaminergic inputs from the ventral tegmental area project to medium spiny neurons (MSN) of  
83 the nucleus accumbens (NAc) (Koob and Volkow, 2010). Furthermore, glutamatergic inputs to the  
84 NAc from the amygdala, frontal cortex, and hippocampus contribute to motivational action  
85 through the extrapyramidal motor system(Koob and Volkow, 2010). Subsequently, the NAc sends  
86 outputs to different nuclei of the ventral pallidum critical for processing and modulating substance  
87 reward signal(Koob and Volkow, 2010). The dorsal striatum (STR) is also hypothesized to be  
88 recruited during the development of compulsive substance-seeking(Koob and Volkow, 2010).  
89 Additionally, the dorsal striatum and prefrontal cortical regions(Goldstein and Volkow, 2011)  
90 regulate reward and addiction-related phenotypes. The findings emphasize the interplay of brain  
91 regions and the cellular components involved in substance use behavior.

92 Increasing evidence reveals strong genetic links to substance use risk(Pasman et al., 2018;  
93 Erzurumluoglu et al., 2019; Karlsson Linnér et al., 2019; Liu et al., 2019b) and SUD(Kendler and  
94 Prescott, 1998a, 1998b; Dick, 2016; Waaktaar et al., 2018). Genome-wide association studies

95 (GWAS) report that genetic risk for substance use shares underlying architecture with other  
96 neuropsychiatric disorders(Pasman et al., 2018; Liu et al., 2019b), of which risk variants tend to  
97 lie in non-coding and functional regions of the human genome(Jensen, 2016). These single  
98 nucleotide polymorphisms (SNPs) can disrupt transcription factor binding in cis-regulatory  
99 elements (CREs) with varying impact on gene regulation and downstream neural circuitry. Many  
100 CREs have tissue- and cell type-specific activity(Roadmap Epigenomics Consortium et al., 2015),  
101 suggesting that cell types and tissues underlying addiction may be uniquely targeted by genetic  
102 variants at these CREs. GWAS for nicotine-, alcohol-(Liu et al., 2019b), and cannabis-use  
103 traits(Pasman et al., 2018) have identified multiple confident risk loci and SNPs linked to  
104 addiction-associated phenotypes with brain-specificity, yet their effects on the CREs of specific  
105 brain regions and cell types involved in addiction pathophysiology are an open area of inquiry.

106 GWAS have found that SNP enrichment within functional non-coding regions contribute  
107 disproportionately to heritability of complex traits due to polygenicity(Finucane et al., 2015).  
108 Linkage disequilibrium (LD) of significant SNPs complicates the identification of causal variants  
109 contributing to genetic risk(Bush and Moore, 2012). The functional consequences of risk SNPs in  
110 CRE sequences cannot be reliably inferred from DNA sequences alone(Shlyueva et al., 2014).  
111 Recent developments in epigenomic assays(Buenrostro et al., 2013; Mo et al., 2015; Tak and  
112 Farnham, 2015) and machine learning(Ghandi et al., 2014; Zhou and Troyanskaya, 2015; Kelley  
113 et al., 2016, 2018; Lee, 2016) can predict cell types affected by addiction-associated genetic  
114 variation to propose cell type-specific hypotheses on the pathogenesis of addiction.

115 Here, we implement a framework that identifies regions and cell types that are affected by  
116 genetic risk variants for addiction-associated traits. We intersect these GWAS variants across  
117 human and mouse datasets from bulk tissue and cell type-specific open chromatin assays to

118 identify region- and cell type-specific CREs that may be impacted by genetic variation associated  
119 with addiction-related traits. We then apply machine learning models to predict open chromatin  
120 activity in key neuronal subtypes within reward circuits and refine our GWAS enrichments in these  
121 subtypes. Further, we apply these models to screen for putative causal SNPs within dense loci  
122 reported in GWAS for addiction-associated traits. This pipeline, to our knowledge, describes the  
123 first integrative analyses across species, regions and cell types to screen for candidate causal  
124 addiction-associated genetic risk variants in dense loci with numerous significant SNPs in LD.

## 125 RESULTS

### 126 Genetic risk for substance use traits is associated with the neuronal epigenomes of reward 127 areas

128 Recent well-powered GWAS have characterized the genetic loci associated with seven  
129 addiction-associated traits, revealing several candidate loci encoding addiction genetic  
130 risk(Pasman et al., 2018; Karlsson Linnér et al., 2019; Liu et al., 2019b). These GWAS identify  
131 genetic variants associated with reward, risk tolerance, and various substance use behaviors to  
132 provide a means of studying genetic variation associated with addiction. We found that 72-98% of  
133 addiction-associated genetic variants map to noncoding intronic or intergenic regions of the  
134 genome (**Figure 1A**). The proportion of intronic risk variants (47%-85%) overrepresented the  
135 proportion of intronic variants on the reference genotype panel (odds ratio,  $OR_{AgeOfInit} = 2.3$ ,  
136  $OR_{Cannabis} = 2.3$ ,  $OR_{CigsPerDay} = 1.4$ ,  $OR_{DrinksPerWeek} = 1.6$ ,  $OR_{RiskyBehavior} = 1.4$ ,  $OR_{SmokCess} = 1.8$ ,  
137  $OR_{SmokInit} = 1.3$ , Fisher's Exact  $P_{Bonferroni} < 8 \times 10^{-79}$ ). Furthermore, these seven traits have shared  
138 and distinct genetic architecture estimated using genetic correlation of risk alleles ( $r_g$ ,  
139 **Supplemental Figure 1A**). Although common genetic variants are shared between addiction-  
140 associated traits on a genome-wide scale, the reported significant loci are often unique to a  
141 particular trait and are densely packed with SNPs in high LD (**Supplemental Figure 1B**).

142 We investigated whether genetic variants of addiction-associated GWAS cluster at putative  
143 cis-regulatory elements (CREs) of the brain using a partitioned heritability linkage disequilibrium  
144 score (LDSC) regression approach(Bulik-Sullivan et al., 2015b; Finucane et al., 2018) on open  
145 chromatin regions (OCRs) of sorted neuronal (NeuN+) and glial (NeuN-) nuclei across 14 brain  
146 regions(Fullard et al., 2018) (**Figure 1B**). We found that genetic variants associated with having  
147 ever regularly smoked (SmokingInitiation), being a former versus current smoker

148 (SmokingCessation), the number of alcoholic drinks per week (DrinksPerWeek), and  
149 lifetime cannabis use (Cannabis) significantly enriched in NeuN+ OCRs of brain regions  
150 known and speculated to contribute to reward and addiction(Volkow and Morales, 2015) (FDR <  
151 0.05). In particular, we found that genetic variants associated with SmokingInitiation and  
152 Cannabis shared enrichment in NeuN+ prefrontal cortical OCRs (from orbitofrontal cortex and  
153 dorsolateral prefrontal cortex) while those associated with SmokingCessation and  
154 DrinksPerWeek shared enrichment in NeuN+ striatal OCRs (both putamen and NAc). The  
155 enrichments of NeuN+ OCRs indicate that genetic variation in epigenomes of neuronal  
156 populations from frontal cortex and striatum contribute to addiction liability. The difference in  
157 NeuN+ enrichments between regions across addiction-associated traits can likely be explained by  
158 the difference in proportions of neuronal subtypes of each area, so we sought to dissect the different  
159 neuronal subtypes contributing to these enrichments.

160 Broad marker-gene based labeling approaches, such as using NeuN to label neurons, do  
161 not capture the rich diversity of neuronal subtypes; bulk NeuN+ open chromatin signal represents  
162 an average signal from heterogeneous neuronal subtypes, each with distinct epigenomic  
163 landscapes, gene regulation, network connectivity. Hence, NeuN-labeled open chromatin profiles  
164 likely do not capture OCRs unique to less populous neuronal subtypes. The difference in  
165 proportions of neuronal subtypes between brain regions may also contribute to brain region-  
166 specific NeuN+ OCR enrichment for GWAS variants of addiction-associated traits. We therefore  
167 applied LDSC regression GWAS enrichment on open chromatin profiles from human postmortem  
168 occipital cortex cell types via single-cell transposase hypersensitivity sequencing (scTHS-seq)  
169 (Lake et al., 2018) (**Figure 1C**). We found that addiction-associated genetic variants largely  
170 enriched in both excitatory and inhibitory neuronal OCRs. We found enrichment of genetic



171 variants associated with age of smoking initiation (*AgeOfInitiation*) and  
172 *SmokingCessation* in OCRs of cortical excitatory neurons. We found no enrichment of  
173 genetic variants associated with average number of cigarettes smoked per day  
174 (*CigarettesPerDay*) for OCRs of occipital cortex cell types. Genetic variants associated with  
175 *SmokingInitiation*, which enriched in astrocyte, endothelial, inhibitory, and  
176 oligodendrocyte precursor cell OCRs, shared enrichment in NeuN- OCRs of mediodorsal thalamus  
177 **(Figure 1B)**. Interestingly, genetic variants associated with *SmokingCessation*, which had  
178 enriched for striatal NeuN+ OCRs, enriched only for OCRs of cortical excitatory neurons and not  
179 cortical inhibitory neurons. Sorted bulk ATAC-seq only showed enrichment of  
180 *SmokingCessation* associated genetic variants in OCRs of NeuN+ striatal regions, which are  
181 largely composed of inhibitory MSNs. Single-cell epigenomics of human postmortem brain can  
182 further dissect the genetic risk for substance-use traits into neuronal subtypes that otherwise would  
183 not be parsed with bulk tissue assays.

184 We confirmed that our pipeline for LDSC regression on NeuN-sorted OCRs from 14 brain  
185 regions is able to reproduce the GWAS enrichments published by Fullard *et al.* While our approach  
186 uses OCRs from reproducible ATAC-seq peaks rather than differentially accessible peaks, we  
187 found consistent enrichments of genetic variants associated with schizophrenia risk  
188 (*Schizophrenia*), highest level of educational attainment (*EduAttain*), and habitual sleep  
189 duration (*SleepDuration*) **(Supplemental Figure 2B)**. We did not find enrichment in brain  
190 OCRs of genetic variants identified in several low-powered GWAS (cocaine dependence  
191 (*CocaineDep*)(Cabana-Domínguez *et al.*, 2019), opioid dependence (*OpioidDep*)(Cheng *et al.*,  
192 2018), and obsessive-compulsive disorder (*OCD*)(International Obsessive Compulsive  
193 Disorder Foundation Genetics Collaborative (IOCDF-GC) and OCD Collaborative Genetics

194 Association Studies (OCGAS), 2018), each of which had included fewer than 5000 individuals  
195 with the trait (**Supplemental Figure 2A**). In addition, we found no enrichments in brain OCR for  
196 several well-powered studies of traits related to addiction behaviors, multi-site chronic pain  
197 (*ChronicPain*)(Johnston et al., 2019) and cups of coffee per day (*CoffeePerDay*)(Coffee  
198 and Caffeine Genetics Consortium et al., 2015) and anthropometric traits coronary artery disease  
199 (CAD) (Howson et al., 2017), bone mineral density (BMD) (Kemp et al., 2017), and lean body mass  
200 (LBM) (Zillikens et al., 2017) (**Supplemental Figure 2B, C**). Lastly, we validated that human  
201 OCRs from non-brain tissues would not enrich for risk variants associated with brain traits. We  
202 gathered publicly available OCRs from stomach ATAC-seq, adipocyte ATAC-seq, preadipocyte  
203 ATAC-seq, liver DNase-seq, and lung DNase-seq profiles(ENCODE Project Consortium, 2012;  
204 Thurman et al., 2012; Davis et al., 2018; Cannon et al., 2019) (**Supplemental Figure 4D**) and  
205 performed LDSC regression on the total 18 GWAS from above. To our expectation, we did not  
206 find enrichments of stomach, liver, or lung OCRs for genetic variants associated with brain-related  
207 traits. We did find enrichment of BMD in lung OCRs, a connection previously recognized(Lee et  
208 al., 2016; Kim et al., 2019; Zeng et al., 2019). The secondary GWAS enrichments in other traits  
209 and foregrounds demonstrate two trends: a GWAS trait would enrich if the GWAS was properly  
210 powered to detect genetic risk variants, and the foreground regions are from cell types or tissue of  
211 that trait's potential etiological origin.

212

### 213 **Mouse-human conserved cell type-specific open chromatin enrich for addiction risk loci**

214 In order to resolve the different neuronal subtypes that comprise the addiction-associated  
215 enrichments in Fullard *et al.* and Lake *et al.* OCRs (**Figure 1, Supplemental Figure 2**), we  
216 performed targeted epigenomics in mouse to isolate various neuronal subtypes from frontal cortex

217 (CTX), caudoputamen (CPU), and the nucleus accumbens (NAc), which are key brain regions of  
218 the reward circuit. We isolated cell type-specific nuclei for ATAC-seq using a modified version  
219 of the INTACT approach (Mo et al., 2015), which we call *cre*-specific nuclei anchored independent  
220 labeling (cSNAIL). cSNAIL-INTACT uses the AAV-PHP.eB virus to isolate nuclei marked by  
221 *Pvalb*, *Sst*, *Drd1*, and *Adora2a cre*-lines without crossing with a *Sun1-Gfp* transgenic mouse  
222 (**Figure 2A**). We show that cell type-targeting provided markedly distinct genome-wide ATAC-  
223 seq profiles compared to bulk tissue ATAC-seq alone (**Supplemental Figure 3A**). cSNAIL  
224 ATAC-seq specifically captured nuclei with increased accessibility around the marker gene that  
225 was driving *Cre* recombinase expression (**Supplemental Figure 3B**). Accessibility around  
226 cSNAIL ATAC-seq transcription start sites (TSS) strongly correlated with matched pseudobulk  
227 gene expression in the same cell type and tissue (**Methods**, both Pearson and Spearman correlation  
228  $P_{\text{bonf}} < 2 \times 10^{-16}$ , **Supplemental Figure 3C,D**). We applied the HALPER approach (Zhang et al.,  
229 2020) to reliably map ~70% of mouse OCRs to their human orthologs in hg38 (**Methods**) to run  
230 LDSC regression GWAS enrichments.

231 Our GWAS enrichments of human orthologs from mouse OCRs of various neuronal  
232 subtypes and bulk tissue (**Figure 2B**) show that genetic variants associated with  
233 SmokingInitiation and Cannabis shared enrichment in human orthologs of mouse  
234 cortical PV and EXC neuron OCRs from both Mo *et al.* and this study (FDR < 0.05). Cannabis  
235 associated genetic variants further enriched in CTX bulk tissue OCRs, which could be attributed  
236 to signal from cortical EXC and PV neuron populations. Cortical PV neuron OCRs further  
237 enriched with genetic variants associated with DrinksPerWeek. SmokingCessation  
238 associated genetic variants distinctly enriched in cortical VIP neuron OCRs.

239           Within cell types from CPU and NAc, we found enrichment of genetic variants associated  
240 with all measured addiction-associated traits in CPU and NAc D2 MSN OCRs. Genetic variants  
241 associated with all measured traits excluding `SmokingInitiation` and `RiskyBehavior` all  
242 enriched in CPU and NAc D1 MSN OCRs. CPU D1 MSN OCRs were enriched with genetic  
243 variants associated with all measured traits excluding `RiskyBehavior`. We found that CPU  
244 bulk tissue OCRs were enriched with genetic variants associated with all measured addiction-  
245 associated traits excluding `AgeOfInitiation` and `RiskyBehavior`. Distinctly, CPU PV+  
246 and SST+ neuron OCRs enriched with genetic variants associated with `Cannabis`.

247           Corresponding to our analysis of human brain OCRs, we also confirmed the specificity of  
248 mouse-human orthologous CRE enrichments for genetic variants of addiction-related, brain-  
249 related, and non-brain related traits (**Supplemental Figure 4**). We found enrichments of genetic  
250 variants associated with `ChronicPain` in cortical PV neuron OCRs from both *Mo et al.* and this  
251 study (**Supplemental Figure 4A**). Within striatal cell types, we found that CPU D2 and NAc D1  
252 MSN OCRs were enriched for genetic variants associated with `ChronicPain`. In contrast, CPU  
253 D1 and NAc D2 MSN OCRs were enriched for genetic variants associated with `OpioidDep`.  
254 Genetic variants associated with `OpioidDep` also enriched in CPU D1 MSN and CPU PV OCRs.  
255 `Schizophrenia`, `EduAttain`, and `SleepDuration` associated genetic variants all  
256 enriched in OCRs of all measured cell types (**Supplemental Figure 4B**). None of these human  
257 orthologs of mouse neuronal OCRs enriched for genetic variants associated with non-brain-related  
258 traits `BMD`, `CAD`, and `LBM` (**Supplemental Figure 4C**). We validated that our approach to map  
259 OCRs from mouse to human did not bias enrichment to brain traits by performing GWAS  
260 enrichment on OCRs from mouse non-brain tissues (kidney, liver, and lung) (**Supplemental**  
261 **Figure 4D**). As expected, we did not find an enrichment for genetic variants associated with a

262 brain-related trait. We did find that human orthologs of lung OCRs enrich for BMD, which concords  
263 with the enrichment of human lung OCRs.

264

## 265 **Machine learning models of mouse cell type-specific CRE activity refine human NeuN+** 266 **OCRs for GWAS enrichment**

267 Assays such as ATAC-seq capture the open chromatin genomic regions that can be  
268 occupied by DNA-binding regulatory proteins. DNA-binding proteins and their cofactors regulate  
269 gene expression, often in response to external stimuli; therefore, the DNA sequences underlying  
270 OCRs reveal the complex combinations of DNA-binding protein motif, i.e. the “*cis*-regulatory  
271 grammar,” that is being read by regulatory proteins to define the cell’s epigenetic state. We  
272 hypothesized that conservation of OCRs between mouse and humans must also rely on a conserved  
273 regulatory grammar to maintain the similar cell identity between human and mouse (Chen et al.,  
274 2018). The concordant pattern of enrichment for addiction associated genetic variants in human  
275 and mouse-human orthologous OCRs suggested that risk variants may affect the regulatory  
276 grammar of cell types conserved in mouse. We therefore trained a collection of convolutional  
277 neural network (CNN) machine learning (ML) models to learn the regulatory grammar for cortical  
278 excitatory (EXC) neurons, striatal D1 MSNs, and striatal D2 MSNs (Zhou and Troyanskaya, 2015;  
279 Kelley et al., 2016, 2018; Chen et al., 2018). For each set of reproducible OCRs from mouse  
280 INTACT and cSNAIL group, we trained 5-fold cross-validated models to predict the reproducible  
281 peaks from ten times the number of GC-matched negative sequences (**Methods**). Our models made  
282 confident predictions on held-out test sequences as reported by accuracy, F1-score, and areas under  
283 the receiver-operator characteristic and precision-recall curves (**Supplemental Figure 5A**).

284 We reasoned that NeuN+ OCR signal that is comprised of several neuronal subtypes that  
285 can be parsed into component cell types by ML models trained to predict OCR activity in those  
286 cell types. To discern whether NeuN+ OCR enrichments in addiction-associated genetic variants  
287 come from the same cell types that we see in **Figure 3**, we used the ML models to predict whether  
288 cortical or striatal NeuN+ OCRs have activity in cortical EXC or striatal D1 and D2 cells,  
289 respectively (**Figure 3A**). We did not conduct these analyses for PV neurons because they  
290 comprise a much lower percentage of cortical and striatal neurons than the other neuron types. We  
291 ran LDSC regression (Finucane et al., 2018) GWAS enrichments on the sets of NeuN+ OCRs  
292 predicted to be specific to cortical EXC, striatal D1, and striatal D2 neurons. Genetic variants  
293 associated with `SmokingInitiation`, which initially enriched in OCRs of various NeuN+  
294 frontal cortical areas (**Figure 1B**), enriched in NeuN+ OCRs predicted to be active in EXC neurons  
295 (**Figure 3B**). Genetic variants associated with `Cannabis`, which enriched in NeuN+ cortical  
296 OCRs (**Figure 1B**), also enriched in NeuN+ OCRs predicted to be active in EXC neurons. The  
297 enrichments of excitatory cortical cell type-specific OCRs for `SmokingInitiation` and  
298 `Cannabis` associated genetic variants agree with the results from the Fullard *et al.* and Lake *et*  
299 *al.* human datasets (**Figure 1B, C**). Genetic variants associated with `SmokingCessation` and  
300 `DrinksPerWeek`, which enriched in PUT and NAc NeuN+ OCRs (**Figure 1B**), shared  
301 enrichment in OCRs predicted active in both D1 and D2 MSNs of both PUT and NAc. The  
302 framework that we outline in **Figure 3A** refines addiction genetic risk signal to neuronal subtypes,  
303 maintains the brain region context of the source NeuN+ OCR, and can be applied to CREs from  
304 any tissue, cell type combination for which bulk tissue open chromatin exists in human and open  
305 chromatin from that cell type exists in another vertebrate (Chen et al., 2018; Minnoye et al., 2020).  
306

307 **Machine learning models predict allele-specific activity of addiction-associated GWAS SNPs**  
308 **in neuronal subtypes**

309 Lastly, we applied our ML models to screen addiction-associated genetic variants for  
310 predicted functional activity in EXC, D1, and D2 neuronal subtypes. These ML-based approaches  
311 have been demonstrated to fine-map dense risk loci and select candidate causal genetic variants  
312 (Alipanahi et al., 2015; Zhou and Troyanskaya, 2015; Kelley et al., 2016, 2018), yet none have  
313 been applied in the context of addiction-associated genetic risk or in the cell types that we have  
314 assayed. We collected 14,790 SNPs across the seven addiction-associated GWAS and filtered  
315 down to 170 SNPs that are in NeuN+ OCRs and predicted to be causal with statistical fine-mapping  
316 (**Methods**). We demonstrated that our cortical and striatal ML models produce scores near 0 (no  
317 predicted open chromatin activity in this cell type) for SNPs not in any OCRs, low scores for SNPs  
318 in NeuN- OCRs, and significantly larger scores (larger predicted open chromatin in this cell type)  
319 for SNPs in NeuN+ OCRs ( $P_{\text{Bonferroni}} < 0.05$ , **Figure 4A**). Using these models and the 170 filtered  
320 SNPs, we prioritized 26 unique SNPs spanning 16 loci with predicted functional consequence on  
321 gene regulation (**Supplemental Figure 5B, Methods**). One such SNP, rs7604640, lies in NeuN+  
322 open chromatin specific to striatum ~46kb upstream of the *SIX3* locus on chromosome 2.  
323 rs7604640 overlaps human orthologs of mouse OCRs in only D1 and D2 neurons and had  
324 predicted open chromatin activity in both D1 and D2 neurons but not in EXC neurons (**Figure**  
325 **4B**). rs7604640 is one of many off-lead SNPs identified in the *SmokingInitiation* GWAS  
326 ( $P_{\text{GWAS}} = 3.04 \times 10^{-12}$ ) and is in LD with the lead SNP rs163522 ( $R^2 = 0.856$ ). Furthermore, this  
327 SNP is a known *cis*-eQTL for the antisense *SIX3-AS1* gene in striatal regions from the Genotype-  
328 Tissue Expression (GTEx) project (GTEx Consortium, 2013, 2015; Melé et al., 2015; GTEx  
329 Consortium et al., 2017). Anti-sense gene expression is one mechanism of regulating their sense

330 gene(Pelechano and Steinmetz, 2013; Barman et al., 2019), and deletion of the gene *SIX3* has been  
331 shown to inhibit development of D2 medium spiny neurons (Xu et al., 2018). Altogether, this  
332 evidence formulates the hypothesis that common genetic variant rs7604640 has D1 and D2 MSN-  
333 specific open chromatin activity in a mouse-human conserved putative CRE regulating the MSN  
334 regulator *SIX3*.

335 We found a number of other SNP candidates that may be putative causal SNPs with cell  
336 type-specific activity in addiction-associated traits (**Supplemental Figure 6**). For example, SNPs  
337 rs11191352 ( $P_{\text{SmokingInitiation}}=2.12 \times 10^{-7}$ ) and rs9844736 ( $P_{\text{RiskyBehavior}}= 3.04 \times 10^{-7}$ ,  
338  $P_{\text{SmokingInitiation}}=3.58 \times 10^{-7}$ ) are both *cis*-eQTL for nearby genes in GTEx striatal regions  
339 (**Supplemental Figure 6A,B**). Curiously, SNPs such as rs7604640, rs10742814, and rs11191352  
340 had predicted cell type-specific activity in only MSNs (**Figure 4B, Supplemental Figure 6A,B**),  
341 while the SNP rs9844736 had predicted activity in mouse-human orthologous CREs from all three  
342 cell types (**Supplemental Figure 6D**). SNPs rs6870603 ( $P_{\text{SmokingInitiation}}=1.04 \times 10^{-8}$ ) and  
343 rs7712167 ( $P_{\text{SmokingInitiation}}=8.79 \times 10^{-9}$ ), which are 317bp apart, were predicted to alter only EXC  
344 open chromatin activity and lie in a strong cortical-specific NeuN+ OCR. The complete summary  
345 of prediction scores and annotations of GTEx eQTL membership for each SNP can be found in  
346 **Supplemental Table 1**.



347 **DISCUSSION**

348           In this study, we demonstrate the first analyses integrating cell type OCRs across human  
349 and mouse brain epigenomics using ML models to select candidate addiction-associated SNPs  
350 acting at putative cell type-specific CREs. We trained ML models to predict cell type-specific  
351 activity of OCRs and used the models to predict whether addiction-associated genetic variants in  
352 risk loci impact putative CRE function. Our findings link the genetic heritability of addiction-  
353 associated behaviors to the OCR profiles of neuronal subtypes and brain regions and present  
354 specific hypotheses describing how genetic variants may impact gene regulation in addiction-  
355 associated behaviors. These analyses in conjunction suggest that genetic variation-associated  
356 nicotine, alcohol, and cannabis use behaviors may impact putative CREs in different combinations  
357 of excitatory (EXC), D1, and D2 neuronal subtypes. These findings provide a foundation for future  
358 investigations into the cell type-specific genetic mechanisms underlying addiction-related traits.  
359 More broadly, our cross-species integrative computational framework leverages high-resolution  
360 cell-type targeted epigenomics in model organisms to interpret the genetic risk variants of complex  
361 traits in humans.

362           We initially found that addiction-associated genetic variants were enriched in human  
363 NeuN+ OCRs of the prefrontal cortex and striatum, known areas involved in addiction and reward  
364 circuitry(Volkow et al., 2013; Koob and Volkow, 2016) (**Figure 5A**). Genetic variants associated  
365 with `SmokingInitiation` and `Cannabis`, initiating behaviors of substance use, were  
366 enriched in NeuN+ OCRs of prefrontal areas including DLPFC, VLPFC, and OFC (**Figure 1B**).  
367 These OCRs were predicted to be active in cortical excitatory neurons of these brain regions  
368 (**Figure 3B**). Addiction-associated genetic variants that enrich in OCRs of cortical excitatory  
369 neurons in these areas may reduce corticostriatal activation from prefrontal cortex to inhibit

370 behaviors predisposing the initiation of substance use(Koob and Volkow, 2010, 2016; Volkow et  
371 al., 2013; Volkow and Morales, 2015). These genetic variants may contribute to reduced prefrontal  
372 self-control reward, leading to behaviors observed in addiction such as impulsivity, reduced  
373 satiety, and enhanced motivation to procure drugs(Volkow et al., 2013; Volkow and Morales,  
374 2015). In addition, we found enrichment of striatal NeuN+ OCRs for genetic variants associated  
375 with `SmokingCessation` and `DrinksPerWeek` (**Figure 1B**). In **Figure 3B**, we showed that  
376 these genetic variants are predicted to affect open chromatin in both D1 and D2 MSNs, which are  
377 coordinators of mesocorticostriatal dopamine systems(Koob and Volkow, 2010, 2016; Volkow et  
378 al., 2013). Genetic variants affecting open chromatin in these MSN subtypes may predispose  
379 individuals to increased alcohol use (`DrinksPerWeek`) or decreased nicotine use  
380 (`SmokingCessation`), perhaps driving the neuroplastic changes in D1 and D2 MSNs  
381 observed in human and rodent drug dependence studies(Volkow et al., 1996, 1997, 2003; Wang et  
382 al., 1997; Fehr et al., 2008; Cheng et al., 2017; Wilar et al., 2019). While drug addiction has been  
383 attributed to various areas of the reward circuit, our investigations into heritable genetic risk for  
384 addiction-associated traits unravel how regulatory DNA sequence variation in OCRs of projection  
385 neurons in implicated areas link genetic risk to neural circuits to behavior.

386         Since cell types in the occipital cortex are not clearly defined for their role in the reward  
387 circuit, we conducted ATAC-seq of projection and interneuron subtypes in mouse brain, mapped  
388 OCRs to human orthologs, and analyzed GWAS enrichment of addiction-associated traits. By  
389 leveraging ortholog mapping tools, we retained high-quality cell type-specific measurements  
390 within relevant brain regions of the reward circuit, enabling analysis of cell populations from brain  
391 regions where we lack primary human open chromatin profiles. Across these brain regions, we  
392 found remarkably concordant enrichments of cell type OCRs between mouse and human profiles

393 as well as shared enrichments between traits (**Figure 5B**). Genetic variants associated with both  
394 `SmokingInitiation` and `Cannabis` enriched in mouse-human orthologous OCRs of  
395 cortical EXC and PV neurons (**Figure 3B**), concordant with enrichments in human cortical NeuN+  
396 OCRs (**Figure 1B**), which were predicted to include EXC neurons (**Figure 4B**). Genetic variants  
397 from these two traits showed replicable enrichment in human EXC and IN neuron OCRs via sc-  
398 THS-seq of occipital cortex (**Figure 1C**), providing strong evidence that genetic variation in  
399 cortical excitatory and inhibitory neuron OCRs confers susceptibility to nicotine and cannabis use  
400 behaviors. Within striatal regions, D1 and D2 MSN mouse-human orthologous OCRs enriched for  
401 genetic variants of all measured addiction-associated traits (**Figure 2B**), with strongest  
402 concordance in human OCRs for genetic variants associated with `SmokingCessation` and  
403 `DrinksPerWeek` (**Figure 3B, Figure 5B**). The enrichments in conserved OCRs of MSN  
404 subtypes in the dorsal striatum and nucleus accumbens unsurprisingly emphasize known roles of  
405 MSNs of both areas to drive and maintain addiction behaviors (Ferguson et al., 2011; Ji et al.,  
406 2017).

407 In an orthogonal approach to mapping mouse-human orthologous OCRs, we leveraged  
408 machine learning models to learn the regulatory grammar of neuronal subtypes characterized in  
409 mouse and refine human NeuN+ OCRs to the major neuronal subtypes of cortex and striatum for  
410 GWAS enrichment. Refinement of NeuN+ OCRs revealed that addiction-associated traits enriched  
411 for two clusters of cell types and brain regions. The first group, which displays concordant cortical  
412 excitatory enrichments between human and mouse, consists of `SmokingInitiation` and  
413 `Cannabis` (**Figure 3B**), and the second group, which displays concordant D1 and D2 MSN  
414 enrichments, consists of `SmokingCessation` and `DrinksPerWeek`. A draw-back of  
415 assigning human NeuN+ OCR membership to individual cell types lies in the considerably low

416 representation of interneurons in both cortical and striatal neuron populations - as low as 12% in  
417 neocortex(Beaulieu, 1993; Lefort et al., 2009) and ~5% in striatum(Tepper and Koós, 2017;  
418 Krienen et al., 2019). NeuN+ open chromatin profiles alone do not always capture OCRs unique  
419 to rare interneurons, some of which had OCRs identified by human single-cell assays and mouse-  
420 human orthologs enriched for addiction GWAS variants (**Figure 1C, Figure 2B**). As a result, we  
421 did not train ML models for PV, SST, or VIP interneurons. However, the striking enrichments of  
422 OCRs from certain interneuron populations for addiction GWAS variants begin to demonstrate  
423 these populations' roles in the addiction neural circuits(Bracci et al., 2002; Lansink et al., 2010;  
424 Wiltschko et al., 2010; Ribeiro et al., 2018; Jiang et al., 2019; Lee et al., 2020; Schall et al., 2020).

425         The overall concordance of enrichments across human and mouse-human orthologous  
426 OCRs suggests a conserved regulatory grammar between mouse and human CREs.  
427 Correspondence in the neural circuitry has been well-appreciated between human studies and  
428 rodent models of addiction(Berke and Hyman, 2000; Koob and Volkow, 2016; Farrell et al., 2018),  
429 and our study further demonstrates that mouse-human conserved OCRs may explain considerable  
430 heritability of addiction-associated traits. This makes animal models suitable not only for studying  
431 the neural circuits of addiction but also cell-type-specific gene-regulatory mechanisms of  
432 addiction.

433         We used several selection criteria along with ML models to predict the functional impact  
434 of genetic variants that may be agents in addiction-associated traits (**Figure 5, Supplemental**  
435 **Figure 5, Supplemental Table 1**). The fine-mapping pipeline described effectively narrows down  
436 a set of 14,790 SNPs to a putatively functional set of 26 candidates that can be experimentally  
437 tested to determine which brain regions and neuronal subtypes they would have function in. The  
438 candidate functional SNPs that our models prioritize demonstrate how a candidate SNP within a

439 locus, such as rs7604640 (**Figure 4B**), might act in different combinations of neuronal subtypes  
440 and brain regions. This pleiotropy adds complexity to discerning which neuronal subtypes have  
441 altered gene regulation in addiction-associated traits. Our approach often reported only one or two  
442 candidates per loci, reflecting the idea that many SNPs in the same loci are significantly associated  
443 with addiction due to LD with the causal SNP and may not influence addiction-associated genetic  
444 predisposition. The candidate SNPs that overlap mouse-human orthologs from the same predicted  
445 cell type raise the idea that altering the conserved regulatory DNA sequence may be a mechanism  
446 of cell type-specific gene regulatory tuning in a population or even across species(Gjoneska et al.,  
447 2015).

448 Our study depends solely on assays of open chromatin as a proxy for putative CREs.  
449 Epigenetic assays for chromatin conformation, histone modifications, and methylation would  
450 further inform how putative CREs regulate nearby gene expression. Furthermore, our predictions  
451 of SNP impact on putative CREs and genes remain to be experimentally validated. While eQTL  
452 studies do not control for inflated associations due to LD and report gene expression differences  
453 from bulk tissue, we do note that our approach prioritizes several SNPs known to be *cis*-eQTLs in  
454 relevant brain regions, which indirectly affirms our framework's ability to select SNPs with  
455 functional impacts on gene regulation. In order to validate our predictions, it will be necessary to  
456 further investigate candidate genetic variants such as rs7604640 (**Figure 4B**) in future studies  
457 using massively parallel reporter assays(Tewhey et al., 2016) or self-transcribing active regulatory  
458 region sequencing(Vockley et al., 2015; Kalita et al., 2018) that can measure regulatory activity  
459 differences between risk and non-risk alleles. The candidate SNPs we identified provide possible  
460 mechanisms linking differences in genetic make-up with the genes, cell types, and brain regions  
461 that could influence addiction and substance use behaviors (**Figure 4**).

## 462 MATERIALS & METHODS

### 463 **ATAC-seq data processing pipeline:**

464 We processed raw FASTQ files of ATAC-seq experiments with the official ENCODE ATAC-seq  
465 pipeline (Landt et al., 2012) accessed by [https://github.com/ENCODE-DCC/atac-](https://github.com/ENCODE-DCC/atac-seq-pipeline)  
466 [seq-pipeline](https://github.com/ENCODE-DCC/atac-seq-pipeline). We ran this pipeline using the mm10 genome assembly for mouse and the hg38  
467 genome for human with the following settings: `smooth_win = 150, multimapping = 0,`  
468 `idr_thresh = 0.1, cap_num_peak = 300,000,`  
469 `keep_irregular_chr_in_bfilt_peak = true`. We grouped biological replicates when  
470 processing data to obtain individual de-duplicated, filtered bam files and reproducible (IDR) peaks  
471 for each condition. Unless otherwise stated, we used the optimal reproducible set of peaks for  
472 downstream analyses. We removed samples that had low periodicity indicated by ENCODE  
473 quality control metrics and reprocessed the remaining replicates with the pipeline.

### 474 **Publicly available datasets**

475 Fullard *et al.* NeuN-sorted ATAC-seq of human postmortem brain (Fullard et al., 2018): We  
476 identified OCRs overlapping addiction-related variants through analysis of human postmortem  
477 brain ATAC-seq in which cells were sorted into NeuN-positive and NeuN-negative groups via  
478 fluorescence activated nuclei sorting (FANS); the brain regions we used were dorsolateral  
479 prefrontal cortex (DLPFC), orbitofrontal cortex (OFC), ventrolateral prefrontal cortex (VLPFC),  
480 anterior cingulate cortex (ACC), superior temporal gyrus (STC), inferior temporal gyrus (ITC),  
481 primary motor cortex (PMC), insula (INS), primary visual cortex (PVC), amygdala (AMY),  
482 hippocampus (HIP), mediodorsal thalamus (MDT), nucleus accumbens (NAc), and putamen  
483 (PUT). We downloaded data from the Sequence Read Archive (SRA) through Gene Expression  
484 Omnibus (GEO) accession #GSE96949. We separated samples by cell type and reprocessed them

485 with the ENCODE pipeline as detailed above, aligning reads to hg38. We used the “optimal  
486 reproducible peaks” for each cell type and brain region as foregrounds in GWAS LDSC  
487 enrichment with the Honeybadger2 OCR set as the background set (see LDSC Regression GWAS  
488 Enrichment Backgrounds).

489 Lake et al. human occipital cortex scTHS-seq (Lake et al., 2018): We downloaded BED-formatted  
490 cell type-specific differential OCRs from occipital cortex scTHS-seq of excitatory neurons (EXC),  
491 inhibitory neurons (IN), astrocytes (AST), endothelial cells (END), oligodendrocyte precursor  
492 cells (OPC), oligodendrocytes (OLI), and microglia (MIC) from the GEO subseries #GSE97887.  
493 We used the hg38 OCR coordinates as foregrounds in LDSC regression GWAS enrichment with  
494 the Honeybadger2 OCR set as the background set (LDSC regression GWAS Enrichment  
495 Backgrounds).

496 Mo *et al.* mouse INTACT-sorted nuclei ATAC-seq (Mo et al., 2015): We downloaded FASTQ  
497 files of *R26-CAG-LSL-Sun1-sfGFP-Myc* transgenic mouse lines for cell type-specific ATAC-seq  
498 performed using the INTACT method from the accession #GSE63137. *Mo et al.* isolated INTACT-  
499 enriched nuclei from three cell types: excitatory neurons (EXC, *Camk2a-cre*), vasoactive intestinal  
500 peptide neurons (VIP, *Vip-cre*), and parvalbumin neurons (PV, *Pvalb-cre*). We reprocessed the  
501 data with the Kundaje Lab open chromatin pipeline using the mm10 genome  
502 ([https://github.com/kundajelab/atac\\_dnase\\_pipelines](https://github.com/kundajelab/atac_dnase_pipelines)). We mapped  
503 reproducible mouse ATAC-seq peaks for each cell type to hg38 using *halLiftover* with the 12-  
504 mammals Cactus alignment (Paten et al., 2011; Hickey et al., 2013) followed by HALPER (Zhang  
505 et al., 2020) (Mapping mouse OCR orthologs) to produce a foreground set of orthologous human  
506 sequences for LDSC regression GWAS enrichment (Finucane et al., 2018). We mapped the  
507 ENCODE mm10 DNaseI-hypersensitive peak set (Yue et al., 2014) to hg38 (Mapping mouse OCR

508 orthologs) and used successfully mapped hg38 orthologs of mm10 OCRs a background set for  
509 mouse foreground enrichments. Furthermore, we used this dataset to evaluate differential  
510 accessibility in cSNAIL-INTACT PV and PV-negative ATAC-seq samples and develop machine  
511 learning models of cell type-specific open chromatin (see Methods below).

512 Human negative control foregrounds (ENCODE Project Consortium, 2012; Thurman et al., 2012;  
513 Davis et al., 2018; Cannon et al., 2019): We downloaded raw ATAC-seq profiles of human adult  
514 female and male stomach ATAC-seq generated by Snyder *et al.* (ENCSR337UIU,  
515 ENCSR851SBY, respectively), female human embryonic liver DNase-seq generated by  
516 Stamatoyannopoulos *et al.* (ENCSR562FNN), and human embryonic lung DNase-seq generated  
517 by Stamatoyannopoulos *et al.* (ENCSR582IPV) from  
518 <https://www.encodeproject.org/>. We processed these files using the ENCODE  
519 pipeline as detailed above to obtain optimal reproducible hg38 peaks. We also downloaded BED  
520 files of human adipocyte and preadipocyte ATAC-seq profiles generated by Cannon *et al.* from  
521 GEO accession number #GSE110734. We mapped these BED coordinates from hg19 to hg38  
522 using liftOver to define negative control foregrounds for human LDSC regression GWAS  
523 enrichment. We merged the human negative control foregrounds and Fullard *et al.* foregrounds  
524 with the Honeybadger2 OCR set to define the background for human negative control foreground  
525 enrichments.

526 Human-orthologous negative control foregrounds (Liu et al., 2019a): We also downloaded raw  
527 ATAC-seq data profiled in female mouse kidney, female mouse liver, and male mouse lung  
528 generated by Liu *et al.* from SRA accession #SRP167062 to define human-orthologous negative  
529 control foregrounds. We processed these files using the ENCODE pipeline as detailed above to  
530 get optimal reproducible peaks. We mapped optimal reproducible peaks from mm10 to hg38 using



531 halLiftover with the 12-mammals Cactus alignment followed by HALPER (Mapping mouse OCR  
532 orthologs) to define negative control foregrounds for human-orthologous LDSC GWAS  
533 enrichments. We merged all human orthologous foregrounds with the human orthologs of the  
534 ENCODE mm10 DNaseI-hypersensitive peak set to define a background for human-orthologous  
535 LDSC GWAS enrichments.

### 536 **Mapping mouse open chromatin region (OCR) orthologs**

537 We employed halLiftover (Hickey et al., 2013) with the 12-mammals Cactus alignment (Paten et  
538 al., 2011) followed by HALPER  
539 (<https://github.com/pfenninglab/halLiftover-postprocessing>)(Zhang et  
540 al., 2020) to map mm10 mouse reproducible OCRs to hg38 human orthologs in order to perform  
541 LDSC regression GWAS enrichment. The Cactus multiple sequence alignment file (Paten et al.,  
542 2011) has 12 genomes, including mm10 and hg38, aligned in a reference-free manner, allowing  
543 us to leverage multi-species alignments to confidently identify orthologous regions across species.  
544 halLiftover uses a Cactus-format multiple species alignment to map BED coordinates of a query  
545 species to orthologous coordinates of a target species, and HALPER constructs contiguous  
546 orthologs from the outputs of halLiftover (Zhang et al., 2020). We ran the `orthologFind.py`  
547 function from HALPER on the outputs of halLiftover using the following parameters: -  
548 `max_frac 5.0 -min_frac 0.05 -protect_dist 5 -narrowPeak -`  
549 `mult_keepone`. In general, 70% of mouse brain ATAC-seq reproducible peaks were able to be  
550 mapped to confident human orthologs. To map the ENCODE mm10 mouse DHS background,  
551 which does not contain summit information, to hg38 we used the mouse coordinates of position  
552 with the most species aligned in a region to define the summit. Only for the mm10 mouse DHS  
553 background set, for which a significant proportion of regions could not be confidently mapped to

554 hg38, we flanked the original assembly coordinates by 300 bp to increase OCR mapping from  
555 54% to 64%.

### 556 **LDSC Regression GWAS Enrichment Backgrounds:**

557 We found that LDSC regression GWAS enrichment analysis is sensitive to the selected  
558 background set of matched regions. To construct appropriate background sets for each GWAS  
559 enrichment, we used the ENCODE and RoadMap Honeybadger2(Roadmap Epigenomics  
560 Consortium et al., 2015) and Mouse DHS peak sets for the respective human and mouse-based  
561 open chromatin GWAS enrichment. The Honeybadger2 set, downloaded from  
562 <https://personal.broadinstitute.org/meuleman/reg2map/>, consists of  
563 DNaseI-hypersensitive OCRs across 53 epigenomes consisting of promoter, enhancer, and dyadic  
564 regions. Honeybadger2 is an appropriate epigenetic reference for enrichment of cell type-specific  
565 open chromatin from various foregrounds such as the Fullard *et al.* and Lake *et al.* Honeybadger2  
566 regions allow the LDSC algorithm to properly account for the heritability from OCRs of a  
567 particular cell type or regions rather than because they tend to be more conserved, are enriched for  
568 ubiquitously active transcription factor motifs, or other factors distinguishing open chromatin from  
569 heterochromatin. The human orthologs of the ENCODE Mouse DHS peak set, downloaded  
570 through the ENCODE ATAC-seq pipeline at  
571 [http://mitra.stanford.edu/kundaje/genome\\_data/mm10/ataqc/mm10\\_univ\\_dhs\\_ucsc.bed.gz](http://mitra.stanford.edu/kundaje/genome_data/mm10/ataqc/mm10_univ_dhs_ucsc.bed.gz),  
572 is a set of peaks combined from mouse DNaseI-hypersensitivity  
573 OCRs from ENCODE and provides a background for human orthologs of mouse OCRs. The mm10  
574 mouse DHS regions were mapped to hg38 as described in **Mapping mouse OCR orthologs**. For  
575 each respective foreground-background pairing, the foreground regions were merged with the  
576 background reference to ensure the background always contained the foreground set. The mouse

577 background was used to calculate the significance of the relationship between mouse OCRs and  
578 GWAS for addiction-associated traits to control for a possible association between the degree to  
579 which a region is conserved and its likelihood in influencing the predisposition to an addiction-  
580 associated trait.

### 581 **GWAS enrichment with partitioned LD score regression analysis**

582 We computed the partitioned heritability of CREs for GWAS variants using the LDSC regression  
583 pipeline for cell type-specific enrichment as outlined in  
584 [https://github.com/bulik/ldsc/wiki/Cell-type-specific-](https://github.com/bulik/ldsc/wiki/Cell-type-specific-analyses)  
585 [analyses](https://github.com/bulik/ldsc/wiki/Cell-type-specific-analyses)(Bulik-Sullivan et al., 2015b). We downloaded the GWAS summary statistics files and  
586 processed them with the LDSC `munge_sumstats` function to filter rare or poorly imputed SNPs  
587 with default parameters. We munged the summary statistics files for HapMap3 SNPs excluding  
588 the MHC regions downloaded at  
589 [http://ldsc.broadinstitute.org/static/media/w\\_hm3.nomHC.snplist.](http://ldsc.broadinstitute.org/static/media/w_hm3.nomHC.snplist.zip)  
590 `zip`. We inspected GWAS file to ensure the effect allele, non-effect allele, sample size, p-value,  
591 and signed summary statistic for each SNP in each GWAS were included and appropriate for  
592 LDSC. The addiction-associated GWAS measure genetic predisposition for age of smoking  
593 initiation (`AgeofInitiation`)(Liu et al., 2019b), heaviness of smoking  
594 (`CigarettesPerDay`)(Liu et al., 2019b), having ever regularly smoked  
595 (`SmokingInitiation`)(Liu et al., 2019b), current versus former smokers  
596 (`SmokingCessation`)(Liu et al., 2019b), alcoholic drinks per week (`DrinksPerWeek`)(Liu  
597 et al., 2019b), cannabis consumption (`Cannabis`)(Pasman et al., 2018), and risk tolerance  
598 (`RiskyBehavior`)(Karlsson Linnér et al., 2019). GWAS traits related to addiction include  
599 multisite chronic pain (`ChronicPain`)(Johnston et al., 2019) and number of coffee cups drank

600 per data (CoffeePerDay)(Coffee and Caffeine Genetics Consortium et al., 2015). Other  
601 addiction-related traits come from underpowered GWAS including opioid dependence  
602 (OpioidDep)(Cheng et al., 2018), cocaine dependence (CocaineDep)(Cabana-Domínguez et  
603 al., 2019), and diagnosis of obsessive-compulsive disorder (OCD)(International Obsessive  
604 Compulsive Disorder Foundation Genetics Collaborative (IOCDF-GC) and OCD Collaborative  
605 Genetics Association Studies (OCAS), 2018). GWAS from strong brain-related traits used are  
606 schizophrenia risk (Schizophrenia)(Schizophrenia Working Group of the Psychiatric Genomics  
607 Consortium, 2014), highest level of educational attainment (EduAttain)(Lee et al., 2018), and  
608 sleep duration (SleepDuration)(Dashti et al., 2019). The non-brain related traits measure  
609 genetic liability for lean body mass (LBM)(Zillikens et al., 2017), bone mineral density  
610 (BMD)(Kemp et al., 2017), and coronary artery disease (CAD)(Howson et al., 2017).

611 We estimated LD scores for each foreground set and corresponding background set with  
612 the LDSC regression pipeline `make_annot` and `ldsc` functions using hg38 1000 Genomes  
613 European Phase 3 European super-population (1000G EUR) cohort plink files downloaded from  
614 <https://data.broadinstitute.org/alkesgroup/LDSCORE/GRCh38/>. An  
615 example of an ATAC-seq optimal set of reproducible peaks mapped to hg38 in narrowPeak  
616 format is annotated with 1000G EUR LD scores using the following call:

```
617 python make_annot.py \  
618 --bed-file optimal_peak.narrowPeak.gz \  
619 --bimfile 1000G.EUR.hg38.${chr}.bim \  
620 --annot-file foreground.${chr}.annot
```

621 We downloaded the baseline v1.2 files for cell type-specific enrichment in hg38  
622 coordinates from the same link above as well as the corresponding weights

623 `'weights.hm3_noMHC'` file excluding the MHC region from  
624 <https://data.broadinstitute.org/alkesgroup/LDSCORE/>. HapMap SNPs and  
625 corresponding weights file used in the LDSC analyses only refer to the SNP rsIDs, rather than  
626 genomic coordinates, so only the baseline and LD statistics used to annotate the foreground and  
627 background files must be in hg38 coordinates. In accordance with the LDSC regression script  
628 input format, we created an `'enrichment.ldcts'` file listing the annotated  
629 foreground/background pair for each foreground set. We estimated the partitioned heritability  
630 using the `ldsc` function, which integrates the foreground and background LD score estimates,  
631 munged GWAS SNP data, baseline variant data, and variants weights. The final function call to  
632 GWAS enrichment is as follows:

```
633 python ldsc.py --h2-cts $Munged_GWAS \  
634     --ref-ld-chr baseline_v1.2/baseline. \  
635     --w-ld-chr weights.hm3_noMHC. \  
636     --ref-ld-chr-cts enrichment.ldcts \  
637     --out $Output_Label
```

638 The pipeline produced LD score regression coefficient, coefficient error, and coefficient p-  
639 value estimates. We adjusted for multiple testing using the false discovery rate on p-values of the  
640 LD score regression coefficients ( $\alpha = 0.05$ ) on all 18 GWAS traits intersected on within  
641 the same foreground/background set. A significant FDR-value indicates enrichment of the  
642 foreground genomic regions for GWAS SNPs relative to the background. Lastly, we computed  
643 genetic correlations in **Supplemental Figure 1A** between GWAS of addiction-associated traits  
644 using the pre-munged summary statistics as described by Bulik-Sullivan *et al.* (Bulik-Sullivan *et*  
645 *al.*, 2015a)

646 **Bulk tissue ATAC-seq**

647 To augment and compare to mouse cell type-specific ATAC-seq datasets generated in this study,  
648 we also performed bulk tissue ATAC-seq from cortex (CTX) and dorsal striatum/nucleus  
649 accumbens (CPU) of 7- and 12-week-old C57Bl/6J mice (N = 2 each age) as described in  
650 Buenrostro *et al.*, 2015(Buenrostro et al., 2015) with the following minor differences in buffers  
651 and reagents. We euthanized mice with isoflurane, rapidly decapitated to extract the brain, and  
652 sectioned it in ice-cold oxygenated aCSF (119mM NaCl, 2.5 mM KCl, 1mM  
653 NaH<sub>2</sub>PO<sub>4</sub>(monobasic), 26.2mM NaHCO<sub>3</sub>, 11mM glucose) at 200-micron sections on a vibratome  
654 (Leica VT1200). We further micro-dissected sections for cortex and dorsal striatum on a stereo  
655 microscope and transferred dissected regions into chilled lysis buffer (Buenrostro et al., 2015). We  
656 dounce homogenized the dissected brains in 5mL of lysis buffer with the loose pestle (pestle A) in  
657 a 15mL glass dounce homogenizer (Pyrex #7722-15). We washed nuclei lysate off the pestle with  
658 5mL of lysis buffer and filtered the nuclei through a 70-micron cell strainer into a 50mL conical  
659 tube. We washed the dounce homogenizer again with 10mL of BL buffer and transferred the lysate  
660 through the 70-micron filter (Foxy 1170C02). We pelleted the 20 mL of nuclei lysate at 2,000 x g  
661 for 10 minutes in a refrigerated centrifuge at 4°C. We discarded the supernatant and resuspended  
662 the nuclei in 100-300 microliters of water to approximate a concentration of 1-2 million nuclei/  
663 mL. We filtered the nuclei suspension through a 40-micron cell strainer. We stained a sample of  
664 nuclei with DAPI (Invitrogen #D1206) and counted the sample to measure 50k nuclei per ATAC-  
665 seq transposition reaction. The remaining steps follow the Buenrostro *et al.*, 2015(Buenrostro et  
666 al., 2015) protocol for tagmentation and library amplification. We shallowly sequenced barcoded  
667 ATAC-seq libraries at 1-5 million reads per sample on an Illumina MiSeq and processed individual  
668 samples through the ENCODE pipeline for initial quality control. We used these QC measures

669 (clear periodicity, library complexity, and minimal bottlenecking) to filter out low-quality samples  
670 and re-pooled a balanced library for paired-end deep sequencing on an Illumina NextSeq to target  
671 30 million uniquely mapped fragments per sample after mitochondrial DNA and PCR duplicate  
672 removal. These raw sequencing files entered processing through the ENCODE ATAC-seq pipeline  
673 as above by merging technical replicates and grouping biological replicates by brain region for  
674 each pipeline run.

### 675 **Cre-Specific Nuclear-Anchored Independent Labeling (cSNAIL) virus procedures**

676 The cSNAIL genome (pAAV-Ef1a-DIO-Sun1-Gfp-WPRE-pA) contains *loxP* sites to invert the  
677 *Sun1-Gfp* fusion gene and integrate into the nuclear membrane of cells expressing the *Cre* gene,  
678 allowing these cell populations to be profiled for various genomic assays (Lawler et al, 2020 in  
679 press J. Neuro). We packaged the cSNAIL genome with AAV variant PHP.eB (pUCmini-iCAP-  
680 PHP.eB) in AAVpro(R) 293T cells (Takara, cat #632273). Viviana Gradinaru provided us with  
681 the pUCmini-iCAP-PHP.eB (<http://n2t.net/addgene:103005>; RRID: Addgene 103005)(Chan et al.,  
682 2017). We precipitated viral particles with polyethylene glycol, isolated with ultracentrifugation  
683 on an iodixanol density gradient, and purified in PBS with centrifugation washes and 0.2 $\mu$ M  
684 syringe filtration. We injected each mouse with  $4.0 \times 10^{11}$ vg into the retro-orbital cavity under  
685 isoflurane anesthesia. We allowed the virus to incubate in the animal for 3-4 weeks to reach peak  
686 expression. We closely monitored the health of the animals throughout the length of the virus  
687 incubation and did not note any concerns.

### 688 **cSNAIL nuclei isolation**

689 On the day of the ATAC-seq experiments, we dissected brain regions from fresh tissue and  
690 extracted nuclei in the same manner as described for bulk tissue experiments. Then, we sorted the  
691 nuclei suspension into Sun1GFP+ (Cre+) and Sun1GFP- (Cre-) fractions using affinity purification

692 with Protein G Dynabeads (Thermo Fisher, cat. 10004D). A pre-clearing incubation with beads  
693 and nuclei for 10-15 minutes removes effects from non-specific binding events. Next, we  
694 incubated the remaining free nuclei with anti-GFP antibody (Invitrogen, #G10362) for 30 minutes  
695 to bind Sun1GFP. Finally, we added new beads to the solution to conjugate with the antibody and  
696 incubated the reaction for an additional 20 minutes. The pre-clear step and all incubations took  
697 place in wash buffer (0.25M Sucrose, 25mM KCl, 5mM MgCl<sub>2</sub>, 20mM Tricine with KOH to pH  
698 7.8, and 0.4% IGEPAL) at 4°C with end-to-end rotation. After the binding process, we separated  
699 bead-bound nuclei on a magnet, washed three times with wash buffer, and filtered through a 20µM  
700 filter to ensure purity. We resuspended nuclei in nuclease-free water for input into the ATAC-seq  
701 tagmentation reaction. We performed nuclei quantification and tagmentation in the same manner  
702 described for bulk tissue ATAC-seq above. We list in the table below the number of animals, the  
703 genotypes, and which regions collected for ATAC-seq experiments in this study. N=2 *Pvalb-cre*  
704 samples from CPU/NAc region had received a sham surgery with saline injection into the external  
705 globus pallidus 5 days before they were sacrificed (Lawler et al, 2020 in press J. Neuro.) N=2  
706 *Drd1-cre* samples from both CPU and NAc regions had received headcap surgeries 3 weeks before  
707 they were sacrificed. Both *Pvalb-cre* and *Drd1-cre* were overall healthy at time of sacrifice.

| <b>Genotype</b>    | <b>Replicates</b> | <b>Sex<br/>(<u>F</u>emale /<u>M</u>ale)</b> | <b>Region and Replicate<br/>per region</b> | <b>Cell<br/>type</b> |
|--------------------|-------------------|---------------------------------------------|--------------------------------------------|----------------------|
| C57BL/6 WT         | N=4               | 2 F, 2 M                                    | CTX= 4, CPU/NAc = 4                        | bulk                 |
| <i>Pvalb-cre</i>   | N=5               | 3 F (CTX)<br>1 F, 1 M (CPU/NAc)             | CTX= 3, CPU/NAc = 2                        | PV                   |
| <i>Sst-cre</i>     | N=2               | 1 F, 1 M                                    | CTX= 2, CPU/NAc = 2                        | SST                  |
| <i>Drd1-cre</i>    | N=2               | 2 F                                         | CPU=2, NAc=2                               | D1                   |
| <i>Adora2a-cre</i> | N=2               | 2 F                                         | CPU=2, NAc=2                               | D2                   |

708

709 **cSNAIL Cell Type Specificity**



710 We created a consensus set of non-overlapping IDR peaks from the ATAC-seq pipeline for  
711 cSNAIL ATAC-seq and Mo *et al.* INTACT samples (Tissue: Ctx, Cpu, and NAc ; Celltype:  
712 EXC, PV, SST, VIP, D1, D2). We extended the peak set 200bp up- and down-stream, count  
713 overlapping fragments with Rsubread v2.0.1 using the de-duplicated BAM files from the  
714 pipeline(Liao et al., 2014), and created with DESeq2 v1.26.0 a variance-stabilized count  
715 matrix aware of experimental Group (combination of Tissue and Celltype) with ~Group  
716 (Love et al., 2014). We plotted the principle component analysis in **Supplemental Figure 3A** for  
717 the first two components with this variance-stabilized count matrix. We used Deeptools  
718 v3.5.0 to convert the same BAM files to normalized bigWig files and average over replicates  
719 of the same Group(Ramírez et al., 2016), We plotted the tracks using pyGenomeTracks v3.5  
720 around marker genes for each cell type (*Slc17a7, Drd1, Adora2a, Pvalb, Sst, Vip*)(Ramírez et al.,  
721 2018) **Supplemental Figure 3B**. We computed the mean accessibility for each Group 2kb up-  
722 and down-stream the transcription start sites (TSS) and correlated  $\log_{10}(\text{TSS accessibility} + 1)$  with  
723 gene expression  $\log_{10}(\text{meta gene counts} + 1)$  of Drop-Seq annotated cell types from prefrontal  
724 cortex and striatum(Saunders et al., 2018). We used the Saunders *et al.* tissue subcluster metagene  
725 profiles (sum of gene expression in all cells) and summed subclusters to cluster-level metagene  
726 profiles. Most tissue cluster metagene profiles corresponded to cSNAIL ATAC-seq celltype and  
727 tissue profiles, with the exception of cSNAIL cortical PV+ samples were matched to Saunders *et*  
728 *al.* cortical MGE+ interneuron clusters.

729

### 730 **Convolutional Neural Network models for CRE cell type classification**

731 We trained a set of convolutional neural network (CNN) models to learn the regulatory grammar  
732 of a given cell type from the DNA sequences underlying the cell type's OCRs. The models take in

733 one-hot encoded 501bp genomic sequences, where positives are centered on the IDR peak summits  
734 that are annotated to be in introns and distal intergenic regions and negatives are approximately  
735 ten times the number of positives sequences that are G/C-matched and not overlapping IDR peaks,  
736 to predict 1 for an OCR or 0 for negative sequence. We excluded promoters (defined as within  
737 5,000bp from the TSS) and exons since distal sequences have been shown to confer more cell type-  
738 specificity and be more predictive of expression levels of regulated genes (Roadmap Epigenomics  
739 Consortium et al., 2015). We constructed the negative set by first building a sequence repository  
740 \$BGDIR according to  
741 [https://bitbucket.org/CBGR/biasaway\\_background\\_construction/src/  
742 master/](https://bitbucket.org/CBGR/biasaway_background_construction/src/master/) from the mouse mm10 genome using 501bp sequences. Then we used the  
743 biasaway(Worsley Hunt et al., 2014; Khan et al., 2020) command-line interface-generated  
744 negative sequences with the matching nucleotide distribution along a sliding window along the  
745 501bp IDR peak sequence:

```
746 biasaway c --foreground $FGFASTA --nfold 10 --deviation 2.6 --step  
747 50 --seed 1 -winlen 100 --bgdirectory $BGDIR
```

748 We employed a 5-fold cross validation chromosome hold-out scheme to train 5 models per set of  
749 IDR peaks to ensure stable and consistently learned regulatory patterns. A model for training a  
750 fold does not see sequences during training from the validation set for that fold, and no models see  
751 the test set until final model performance evaluation. Sequences from these chromosomes were  
752 used as the validation set for each fold:

753 fold1: {chr6, chr13, chr21}

754 fold2: {chr7, chr14, chr18}

755 fold3: {chr11, chr17, chrX}

756 fold4: {chr9, chr12}

757 fold5: {chr10, chr8}.

758 We used sequences from chromosomes {chr1, chr2, chr19} for the test set.

759 We trained the models with Keras v2.3.0-tf (<https://keras.io/>) implemented  
760 through Tensorflow v2.2.0 and used stochastic gradient descent (SGD) with Nesterov  
761 momentum to minimize the binary cross entropy loss and learn model parameters. All models used  
762 the same CNN architecture with five consecutive Conv2D layers (conv\_width = 11,  
763 conv\_height = 4, conv\_filters = 200, stride = 1), one MaxPooling2D layer  
764 (max\_pool\_size = 26, max\_pool\_stride = 26), one Dense layer (dense\_filters  
765 = 300), one Dropout layer (proportion\_dropout = .1), and a final output Dense layer  
766 (activation = 'sigmoid'). All Conv2D and Dense used the 'relu' activation and L2  
767 regularization (l2\_reg = 1e-10), unless otherwise stated. We applied the One-Cycle-Policy  
768 (OCP) with linear cyclical learning rate and momentum between a base and max rates as described  
769 previously (Smith, 2018) to train each fold with batch\_size = 2000, epochs = 23,  
770 num\_cycles = 2.35, base\_learning\_rate = 1e-2, max\_learning\_rate =  
771 1e-1, base\_momentum = .85, max\_momentum = 0.99. These parameters robustly and  
772 efficiently trained models across folds to accurately predict positive OCRs of all cell types against  
773 an approximately 1:10 positive:negative class imbalance. We computed classifier performance  
774 metrics including weighted accuracy (using threshold = 0.5), weighted f1\_score (using threshold  
775 = 0.5), area under receiver operating characteristic (auROC), and area under precision-recall curve  
776 (auPRC). We provide the scripts and .h5 files with Keras model architectures and weights on the  
777 GitHub page  
778 [https://github.com/pfenninglab/addiction\\_gwas\\_enrichment](https://github.com/pfenninglab/addiction_gwas_enrichment).

779

780 **Machine learning cell type-specific prioritization of Fullard et al. NeuN+ ATAC-seq peaks**

781 We used CNN model scores to classify whether a peak from Fullard et al. NeuN+ open chromatin  
782 data is active in a neuronal subtype {EXC, D1, D2}. We took NeuN+ IDR “optimal peaks”  
783 from regions significantly enriched for addiction-associated traits {OFC, VLPFC, DLPFC,  
784 ACC, STC, PUT, NAc, **Figure 1A**}, extracted 501bp DNA sequences of each centered on the  
785 summit, and scored each peak with cell type-specific machine learning models trained with the  
786 appropriate tissue context (e.g. score cortical NeuN+ peaks with a model trained with cortical EXC  
787 cell type). We averaged scores across model folds from the same cell types and classified NeuN+  
788 peaks with scores greater than 0.5 as active in that cell type. We defined these ML-prioritized  
789 peaks as foregrounds for LDSC regression GWAS enrichment analyses as described above. We  
790 created a consensus set of peaks merging all model-prioritized peaks and the Honeybadger2 set of  
791 OCRs to be the matched background, and we performed GWAS enrichment and computed FDR  
792 on all 18 GWAS traits (only enrichments for addiction-associated GWAS shown, **Figure 3**).

793

794 **Addiction-associated GWAS processing and cell type-specific candidate selection**

795 We collected the addiction-associated SNPs by submitting the summary statistics files for the  
796 seven addiction-associated traits {AgeofInitiation (Liu et al., 2019b),  
797 CigarettesPerDay (Liu et al., 2019b), SmokingInitiation (Liu et al., 2019b),  
798 SmokingCessation (Liu et al., 2019b), DrinksPerWeek (Liu et al., 2019b), Cannabis  
799 (Pasman et al., 2018), RiskyBehavior (Karlsson Linnér et al., 2019)} to the FUMA webserver  
800 (Watanabe et al., 2017). FUMA computed LD  $R^2$  based on the 1000 Genomes European (1000G  
801 EUR) super-population reference (1000 Genomes Project Consortium et al., 2015) via PLINK

802 (Purcell et al., 2007), linked GWAS-significant lead SNPs to off-lead SNPs in LD with the lead,  
803 and annotated functional consequences of genetic variants via ANNOVAR based on ENSEMBL  
804 build 85 human gene annotations (Wang et al., 2010) (**Figure 1A**). ANNOVAR functional gene  
805 annotations for a SNP are as defined in the primary publication and online:  
806 [https://annovar.openbioinformatics.org/en/latest/user-](https://annovar.openbioinformatics.org/en/latest/user-guide/gene/)  
807 [guide/gene/](https://annovar.openbioinformatics.org/en/latest/user-guide/gene/). The aggregate of 14,790 unique SNPs span 215 genomic loci. We limited  
808 ourselves SNPs that overlapped Fullard *et al.* NeuN+ OCRs (Fullard et al., 2018) since nucleotide  
809 variants in these peaks may disrupt epigenomic DNA sequences measured by ATAC-seq. We also  
810 limited ourselves SNPs that are fine-mapped and predicted to be causal by CAUSALdb using the  
811 European LD structure and an ensemble of statistical fine-mapping tools (FINEMAP,  
812 CAVIARBF, PAINTOR) (Chen et al., 2015; Benner et al., 2016; Kichaev et al., 2017; Wang et  
813 al., 2020). Combining these two filtering heuristics, being in NeuN+ OCRs and fine-mapped  
814 putatively causal, narrowed us down to 170 SNPs over 54 loci to be further refined for cell-type-  
815 specific activity.

816 We further filtered the 170 SNPs to only those overlapping OCRs from cortical and striatal  
817 brain regions are enriched for addiction-associated variants {OFC, DLPFC, VLPFC, ACC,  
818 STC, PUT, NAc} (**Figure 1A**), and scored the filtered SNPs with ML models trained on mouse  
819 cortical or striatal cell type-specific ATAC-seq. We inputted DNA sequences of 501 bp centered  
820 at the SNP location for both the effect and non-effect allele into the ML models for predicting cell  
821 type-specific OCR activity and, for each cell type, computed the average cell type score  
822 (prediction) across models from different folds for each of the effect and non-effect alleles. To  
823 predict a measure of functional impact of the effect allele, we computed a SNP delta score  
824 ( $\text{score}_{\text{effect}} - \text{score}_{\text{non-effect}}$ ). Most SNPs reported by GWAS are not expected to be the

825 causal variant for a trait, so the distribution of cell type-specific model scores on the full list of  
826 14,790 SNPs can be used to define a null distribution. From the 170 SNPs, we predict whether a  
827 SNP might have functional impact in cell type if either allele has a score  $> 0.5$  and if the delta  
828 score magnitude is  $> 0.05$ , the standard deviation of null delta scores. To accompany cell type-  
829 specific activity predictions, we downloaded SNPs that are reported *cis* expression quantitative  
830 trait loci (eQTL) in human cortex, frontal cortex (DLPFC), ACC, caudate, putamen, and NAc from  
831 the GTEX Consortium from <https://www.gtexportal.org/home/datasets> (GTEx  
832 Consortium, 2013, 2015). We identified genes for which at least one of the 170 SNPs is  
833 an eQTL and plotted them as arcs in **Figure 4B** and **Supplemental Figure 4**. Locus plots are  
834 generated with `pyGenomeTracks v3.5` tools (Ramírez et al., 2018).

835 For **Figure 4A**, we compared SNP scores of the effect allele across each model and grouped  
836 them by whether they overlapped a cortical or striatal NeuN+ OCR, NeuN- OCR, both, or neither,  
837 depending on whether the model was for EXC or D1/D2 cell types, respectively. We computed 2-  
838 tailed t-tests between groups and corrected for multiple comparisons with the family-wise  
839 Bonferroni method for  $N=18$  tests from three models and (4 choose 2) six possible comparisons  
840 per model. \*  $P < 0.05/N$ , \*\*  $P < 0.01/N$ , \*\*\*  $P < 0.001/N$ .

841

## 842 DATA AVAILABILITY

843 Code used to run intermediate and final analyses reported in this paper are available on the GitHub  
844 page: [https://github.com/pfenninglab/addiction\\_gwas\\_enrichment](https://github.com/pfenninglab/addiction_gwas_enrichment).

845 Sequencing output files for data generated in this study are deposited on the GEO at accession

846 XXXXX. Questions and comments about data and analyses may be directed to the corresponding  
847 author.

## 848 **Bibliography**

- 849 1000 Genomes Project Consortium, Auton A, Brooks LD, Durbin RM, Garrison EP, Kang HM,  
850 Korbel JO, Marchini JL, McCarthy S, McVean GA, Abecasis GR (2015) A global  
851 reference for human genetic variation. *Nature* 526:68–74.
- 852 Alipanahi B, Delong A, Weirauch MT, Frey BJ (2015) Predicting the sequence specificities of  
853 DNA- and RNA-binding proteins by deep learning. *Nat Biotechnol* 33:831–838.
- 854 Barman P, Reddy D, Bhaumik SR (2019) Mechanisms of Antisense Transcription Initiation with  
855 Implications in Gene Expression, Genomic Integrity and Disease Pathogenesis.  
856 *Noncoding RNA* 5.
- 857 Beaulieu C (1993) Numerical data on neocortical neurons in adult rat, with special reference to  
858 the GABA population. *Brain Res* 609:284–292.
- 859 Benner C, Spencer CCA, Havulinna AS, Salomaa V, Ripatti S, Pirinen M (2016) FINEMAP:  
860 efficient variable selection using summary data from genome-wide association studies.  
861 *Bioinformatics* 32:1493–1501.
- 862 Berke JD, Hyman SE (2000) Addiction, dopamine, and the molecular mechanisms of memory.  
863 *Neuron* 25:515–532.
- 864 Bracci E, Centonze D, Bernardi G, Calabresi P (2002) Dopamine excites fast-spiking  
865 interneurons in the striatum. *J Neurophysiol* 87:2190–2194.
- 866 Buenrostro JD, Giresi PG, Zaba LC, Chang HY, Greenleaf WJ (2013) Transposition of native  
867 chromatin for fast and sensitive epigenomic profiling of open chromatin, DNA-binding  
868 proteins and nucleosome position. *Nat Methods* 10:1213–1218.
- 869 Buenrostro JD, Wu B, Chang HY, Greenleaf WJ (2015) ATAC-seq: A Method for Assaying  
870 Chromatin Accessibility Genome-Wide. *Curr Protoc Mol Biol* 109:21.29.1-21.29.9.
- 871 Bulik-Sullivan B, Finucane HK, Anttila V, Gusev A, Day FR, Loh P-R, ReproGen Consortium,  
872 Psychiatric Genomics Consortium, Genetic Consortium for Anorexia Nervosa of the  
873 Wellcome Trust Case Control Consortium 3, Duncan L, Perry JRB, Patterson N,  
874 Robinson EB, Daly MJ, Price AL, Neale BM (2015a) An atlas of genetic correlations  
875 across human diseases and traits. *Nat Genet* 47:1236–1241.
- 876 Bulik-Sullivan B, Loh P-R, Finucane HK, Ripke S, Yang J, Schizophrenia Working Group of the  
877 Psychiatric Genomics Consortium, Patterson N, Daly MJ, Price AL, Neale BM (2015b)  
878 LD Score regression distinguishes confounding from polygenicity in genome-wide  
879 association studies. *Nat Genet* 47:291–295.
- 880 Bush WS, Moore JH (2012) Chapter 11: Genome-wide association studies. *PLoS Comput Biol*  
881 8:e1002822.
- 882 Cabana-Domínguez J, Shivalikanjli A, Fernández-Castillo N, Cormand B (2019) Genome-wide  
883 association meta-analysis of cocaine dependence: Shared genetics with comorbid  
884 conditions. *Prog Neuropsychopharmacol Biol Psychiatry* 94:109667.
- 885 Cannon ME, Currin KW, Young KL, Perrin HJ, Vadlamudi S, Safi A, Song L, Wu Y, Wabitsch  
886 M, Laakso M, Crawford GE, Mohlke KL (2019) Open Chromatin Profiling in Adipose  
887 Tissue Marks Genomic Regions with Functional Roles in Cardiometabolic Traits. *G3*  
888 (Bethesda) 9:2521–2533.
- 889 Chan KY, Jang MJ, Yoo BB, Greenbaum A, Ravi N, Wu W-L, Sánchez-Guardado L, Lois C,  
890 Mazmanian SK, Deverman BE, Gradinaru V (2017) Engineered AAVs for efficient  
891 noninvasive gene delivery to the central and peripheral nervous systems. *Nat Neurosci*  
892 20:1172–1179.
- 893 Chen L, Fish AE, Capra JA (2018) Prediction of gene regulatory enhancers across species



- 894 reveals evolutionarily conserved sequence properties. *PLoS Comput Biol* 14:e1006484.  
895 Chen W, Larrabee BR, Ovsyannikova IG, Kennedy RB, Haralambieva IH, Poland GA, Schaid  
896 DJ (2015) Fine Mapping Causal Variants with an Approximate Bayesian Method Using  
897 Marginal Test Statistics. *Genetics* 200:719–736.
- 898 Cheng Y, Huang CCY, Ma T, Wei X, Wang X, Lu J, Wang J (2017) Distinct synaptic  
899 strengthening of the striatal direct and indirect pathways drives alcohol consumption.  
900 *Biol Psychiatry* 81:918–929.
- 901 Cheng Z, Zhou H, Sherva R, Farrer LA, Kranzler HR, Gelernter J (2018) Genome-wide  
902 Association Study Identifies a Regulatory Variant of RGMA Associated With Opioid  
903 Dependence in European Americans. *Biol Psychiatry* 84:762–770.
- 904 Coffee and Caffeine Genetics Consortium et al. (2015) Genome-wide meta-analysis identifies six  
905 novel loci associated with habitual coffee consumption. *Mol Psychiatry* 20:647–656.
- 906 Dashti HS et al. (2019) Genome-wide association study identifies genetic loci for self-reported  
907 habitual sleep duration supported by accelerometer-derived estimates. *Nat Commun*  
908 10:1100.
- 909 Davis CA, Hitz BC, Sloan CA, Chan ET, Davidson JM, Gabdank I, Hilton JA, Jain K,  
910 Baymuradov UK, Narayanan AK, Onate KC, Graham K, Miyasato SR, Dreszer TR,  
911 Strattan JS, Jolanki O, Tanaka FY, Cherry JM (2018) The Encyclopedia of DNA  
912 elements (ENCODE): data portal update. *Nucleic Acids Res* 46:D794–D801.
- 913 Dick DM (2016) The genetics of addiction: where do we go from here? *J Stud Alcohol Drugs*  
914 77:673–675.
- 915 Eddie D, Greene MC, White WL, Kelly JF (2019) Medical burden of disease among individuals  
916 in recovery from alcohol and other drug problems in the united states: findings from the  
917 national recovery survey. *J Addict Med* 13:385–395.
- 918 ENCODE Project Consortium (2012) An integrated encyclopedia of DNA elements in the  
919 human genome. *Nature* 489:57–74.
- 920 Erzurumluoglu AM et al. (2019) Meta-analysis of up to 622,409 individuals identifies 40 novel  
921 smoking behaviour associated genetic loci. *Mol Psychiatry*.
- 922 Farrell MR, Schoch H, Mahler SV (2018) Modeling cocaine relapse in rodents: Behavioral  
923 considerations and circuit mechanisms. *Prog Neuropsychopharmacol Biol Psychiatry*  
924 87:33–47.
- 925 Fehr C, Yakushev I, Hohmann N, Buchholz H-G, Landvogt C, Deckers H, Eberhardt A, Kläger  
926 M, Smolka MN, Scheurich A, Dielentheis T, Schmidt LG, Rösch F, Bartenstein P,  
927 Gründer G, Schreckenberger M (2008) Association of low striatal dopamine d2 receptor  
928 availability with nicotine dependence similar to that seen with other drugs of abuse. *Am J*  
929 *Psychiatry* 165:507–514.
- 930 Ferguson SM, Eskenazi D, Ishikawa M, Wanat MJ, Phillips PEM, Dong Y, Roth BL, Neumaier  
931 JF (2011) Transient neuronal inhibition reveals opposing roles of indirect and direct  
932 pathways in sensitization. *Nat Neurosci* 14:22–24.
- 933 Finucane HK et al. (2015) Partitioning heritability by functional annotation using genome-wide  
934 association summary statistics. *Nat Genet* 47:1228–1235.
- 935 Finucane HK et al. (2018) Heritability enrichment of specifically expressed genes identifies  
936 disease-relevant tissues and cell types. *Nat Genet* 50:621–629.
- 937 Fullard JF, Hauberg ME, Bendl J, Egervari G, Cirmaru M-D, Reach SM, Motl J, Ehrlich ME,  
938 Hurd YL, Roussos P (2018) An atlas of chromatin accessibility in the adult human brain.  
939 *Genome Res* 28:1243–1252.

- 940 GBD 2016 Alcohol and Drug Use Collaborators (2018) The global burden of disease attributable  
941 to alcohol and drug use in 195 countries and territories, 1990-2016: a systematic analysis  
942 for the Global Burden of Disease Study 2016. *Lancet Psychiatry* 5:987–1012.
- 943 Ghandi M, Lee D, Mohammad-Noori M, Beer MA (2014) Enhanced regulatory sequence  
944 prediction using gapped k-mer features. *PLoS Comput Biol* 10:e1003711.
- 945 Gjoneska E, Pfenning AR, Mathys H, Quon G, Kundaje A, Tsai L-H, Kellis M (2015)  
946 Conserved epigenomic signals in mice and humans reveal immune basis of Alzheimer’s  
947 disease. *Nature* 518:365–369.
- 948 Goldstein RZ, Volkow ND (2011) Dysfunction of the prefrontal cortex in addiction:  
949 neuroimaging findings and clinical implications. *Nat Rev Neurosci* 12:652–669.
- 950 GTEx Consortium (2013) The Genotype-Tissue Expression (GTEx) project. *Nat Genet* 45:580–  
951 585.
- 952 GTEx Consortium (2015) Human genomics. The Genotype-Tissue Expression (GTEx) pilot  
953 analysis: multitissue gene regulation in humans. *Science* 348:648–660.
- 954 GTEx Consortium et al. (2017) Genetic effects on gene expression across human tissues. *Nature*  
955 550:204–213.
- 956 Hickey G, Paten B, Earl D, Zerbino D, Haussler D (2013) HAL: a hierarchical format for storing  
957 and analyzing multiple genome alignments. *Bioinformatics* 29:1341–1342.
- 958 Howson JMM et al. (2017) Fifteen new risk loci for coronary artery disease highlight arterial-  
959 wall-specific mechanisms. *Nat Genet* 49:1113–1119.
- 960 International Obsessive Compulsive Disorder Foundation Genetics Collaborative (IOCDF-GC)  
961 and OCD Collaborative Genetics Association Studies (OCGAS) (2018) Revealing the  
962 complex genetic architecture of obsessive-compulsive disorder using meta-analysis. *Mol*  
963 *Psychiatry* 23:1181–1188.
- 964 Jensen KP (2016) A Review of Genome-Wide Association Studies of Stimulant and Opioid Use  
965 Disorders. *Mol Neuropsychiatry* 2:37–45.
- 966 Ji X, Saha S, Kolpakova J, Guildford M, Tapper AR, Martin GE (2017) Dopamine Receptors  
967 Differentially Control Binge Alcohol Drinking-Mediated Synaptic Plasticity of the Core  
968 Nucleus Accumbens Direct and Indirect Pathways. *J Neurosci* 37:5463–5474.
- 969 Jiang C, Wang X, Le Q, Liu P, Liu C, Wang Z, He G, Zheng P, Wang F, Ma L (2019) Morphine  
970 coordinates SST and PV interneurons in the prelimbic cortex to disinhibit pyramidal  
971 neurons and enhance reward. *Mol Psychiatry*.
- 972 Johnston KJA, Adams MJ, Nicholl BI, Ward J, Strawbridge RJ, Ferguson A, McIntosh AM,  
973 Bailey MES, Smith DJ (2019) Genome-wide association study of multisite chronic pain  
974 in UK Biobank. *PLoS Genet* 15:e1008164.
- 975 Kalita CA, Brown CD, Freiman A, Isherwood J, Wen X, Pique-Regi R, Luca F (2018) High-  
976 throughput characterization of genetic effects on DNA-protein binding and gene  
977 transcription. *Genome Res* 28:1701–1708.
- 978 Karlsson Linnér R et al. (2019) Genome-wide association analyses of risk tolerance and risky  
979 behaviors in over 1 million individuals identify hundreds of loci and shared genetic  
980 influences. *Nat Genet* 51:245–257.
- 981 Kelley DR, Reshef YA, Bileschi M, Belanger D, McLean CY, Snoek J (2018) Sequential  
982 regulatory activity prediction across chromosomes with convolutional neural networks.  
983 *Genome Res* 28:739–750.
- 984 Kelley DR, Snoek J, Rinn JL (2016) Basset: learning the regulatory code of the accessible  
985 genome with deep convolutional neural networks. *Genome Res* 26:990–999.

- 986 Kemp JP et al. (2017) Identification of 153 new loci associated with heel bone mineral density  
987 and functional involvement of GPC6 in osteoporosis. *Nat Genet* 49:1468–1475.
- 988 Kendler KS, Prescott CA (1998a) Cannabis use, abuse, and dependence in a population-based  
989 sample of female twins. *Am J Psychiatry* 155:1016–1022.
- 990 Kendler KS, Prescott CA (1998b) Cocaine use, abuse and dependence in a population-based  
991 sample of female twins. *Br J Psychiatry* 173:345–350.
- 992 Khan A, Riudavets Puig R, Boddie P, Mathelier A (2020) BiasAway: command-line and web  
993 server to generate nucleotide composition-matched DNA background sequences.  
994 Available at: <https://biasaway.uio.no> [Accessed July 1, 2020].
- 995 Kichaev G, Roytman M, Johnson R, Eskin E, Lindström S, Kraft P, Pasaniuc B (2017) Improved  
996 methods for multi-trait fine mapping of pleiotropic risk loci. *Bioinformatics* 33:248–255.
- 997 Kim C, Kim S, Lee KY, Kim NH, Kang E-Y, Oh Y-W, Shin C (2019) Differences in bone  
998 density on chest CT according to smoking status in males without chronic obstructive  
999 lung disease. *Sci Rep* 9:10467.
- 1000 Koob GF, Volkow ND (2010) Neurocircuitry of addiction. *Neuropsychopharmacology* 35:217–  
1001 238.
- 1002 Koob GF, Volkow ND (2016) Neurobiology of addiction: a neurocircuitry analysis. *Lancet*  
1003 *Psychiatry* 3:760–773.
- 1004 Krienen FM et al. (2019) Innovations in primate interneuron repertoire. *BioRxiv*.
- 1005 Lake BB, Chen S, Sos BC, Fan J, Kaeser GE, Yung YC, Duong TE, Gao D, Chun J, Kharchenko  
1006 PV, Zhang K (2018) Integrative single-cell analysis of transcriptional and epigenetic  
1007 states in the human adult brain. *Nat Biotechnol* 36:70–80.
- 1008 Landt SG et al. (2012) ChIP-seq guidelines and practices of the ENCODE and modENCODE  
1009 consortia. *Genome Res* 22:1813–1831.
- 1010 Lansink CS, Goltstein PM, Lankelma JV, Pennartz CMA (2010) Fast-spiking interneurons of the  
1011 rat ventral striatum: temporal coordination of activity with principal cells and  
1012 responsiveness to reward. *Eur J Neurosci* 32:494–508.
- 1013 Lee D (2016) LS-GKM: a new gkm-SVM for large-scale datasets. *Bioinformatics* 32:2196–  
1014 2198.
- 1015 Lee IS, Leem AY, Lee SH, Rhee Y, Ha Y, Kim YS (2016) Relationship between pulmonary  
1016 function and bone mineral density in the Korean National Health and Nutrition  
1017 Examination Survey. *Korean J Intern Med* 31:899–909.
- 1018 Lee JH, Ribeiro EA, Kim J, Ko B, Kronman H, Jeong YH, Kim JK, Janak PH, Nestler EJ, Koo  
1019 JW, Kim J-H (2020) Dopaminergic regulation of nucleus accumbens cholinergic  
1020 interneurons demarcates susceptibility to cocaine addiction. *Biol Psychiatry*.
- 1021 Lee JJ et al. (2018) Gene discovery and polygenic prediction from a genome-wide association  
1022 study of educational attainment in 1.1 million individuals. *Nat Genet* 50:1112–1121.
- 1023 Lefort S, Tómm C, Floyd Sarria JC, Petersen CCH (2009) The excitatory neuronal network of  
1024 the C2 barrel column in mouse primary somatosensory cortex. *Neuron* 61:301–316.
- 1025 Liao Y, Smyth GK, Shi W (2014) featureCounts: an efficient general purpose program for  
1026 assigning sequence reads to genomic features. *Bioinformatics* 30:923–930.
- 1027 Liu C, Wang M, Wei X, Wu L, Xu J, Dai X, Xia J, Cheng M, Yuan Y, Zhang P, Li J, Feng T,  
1028 Chen A, Zhang W, Chen F, Shang Z, Zhang X, Peters BA, Liu L (2019a) An ATAC-seq  
1029 atlas of chromatin accessibility in mouse tissues. *Sci Data* 6:65.
- 1030 Liu M et al. (2019b) Association studies of up to 1.2 million individuals yield new insights into  
1031 the genetic etiology of tobacco and alcohol use. *Nat Genet* 51:237–244.

- 1032 Love MI, Huber W, Anders S (2014) Moderated estimation of fold change and dispersion for  
1033 RNA-seq data with DESeq2. *Genome Biol* 15:550–550.
- 1034 Melé M et al. (2015) The human transcriptome across tissues and individuals. *Science* 348:660–  
1035 665.
- 1036 Minnoye L, Taskiran II, Mauduit D, Fazio M, Van Aerschot L, Hulselmans G, Christiaens V,  
1037 Makhzami S, Seltenhammer M, Karras P, Primot A, Cadieu E, van Rooijen E, Marine J-  
1038 C, Egidy G, Ghanem GE, Zon L, Wouters J, Aerts S (2020) Cross-species analysis of  
1039 enhancer logic using deep learning. *Genome Res*.
- 1040 Mo A, Mukamel EA, Davis FP, Luo C, Henry GL, Picard S, Urich MA, Nery JR, Sejnowski TJ,  
1041 Lister R, Eddy SR, Ecker JR, Nathans J (2015) Epigenomic signatures of neuronal  
1042 diversity in the mammalian brain. *Neuron* 86:1369–1384.
- 1043 Pasman JA et al. (2018) GWAS of lifetime cannabis use reveals new risk loci, genetic overlap  
1044 with psychiatric traits, and a causal influence of schizophrenia. *Nat Neurosci* 21:1161–  
1045 1170.
- 1046 Paten B, Earl D, Nguyen N, Diekhans M, Zerbino D, Haussler D (2011) Cactus: Algorithms for  
1047 genome multiple sequence alignment. *Genome Res* 21:1512–1528.
- 1048 Pear VA, Ponicki WR, Gaidus A, Keyes KM, Martins SS, Fink DS, Rivera-Aguirre A,  
1049 Gruenewald PJ, Cerdá M (2019) Urban-rural variation in the socioeconomic determinants  
1050 of opioid overdose. *Drug Alcohol Depend* 195:66–73.
- 1051 Pelechano V, Steinmetz LM (2013) Gene regulation by antisense transcription. *Nat Rev Genet*  
1052 14:880–893.
- 1053 Pullen E, Oser C (2014) Barriers to substance abuse treatment in rural and urban communities:  
1054 counselor perspectives. *Subst Use Misuse* 49:891–901.
- 1055 Purcell S, Neale B, Todd-Brown K, Thomas L, Ferreira MAR, Bender D, Maller J, Sklar P, de  
1056 Bakker PIW, Daly MJ, Sham PC (2007) PLINK: a tool set for whole-genome association  
1057 and population-based linkage analyses. *Am J Hum Genet* 81:559–575.
- 1058 Ramírez F, Bhardwaj V, Arrigoni L, Lam KC, Grüning BA, Villaveces J, Habermann B, Akhtar  
1059 A, Manke T (2018) High-resolution TADs reveal DNA sequences underlying genome  
1060 organization in flies. *Nat Commun* 9:189.
- 1061 Ramírez F, Ryan DP, Grüning B, Bhardwaj V, Kilpert F, Richter AS, Heyne S, Dündar F,  
1062 Manke T (2016) deepTools2: a next generation web server for deep-sequencing data  
1063 analysis. *Nucleic Acids Res* 44:W160-5.
- 1064 Ribeiro EA et al. (2018) Transcriptional and physiological adaptations in nucleus accumbens  
1065 somatostatin interneurons that regulate behavioral responses to cocaine. *Nat Commun*  
1066 9:3149.
- 1067 Roadmap Epigenomics Consortium et al. (2015) Integrative analysis of 111 reference human  
1068 epigenomes. *Nature* 518:317–330.
- 1069 Saunders A, Macosko EZ, Wysoker A, Goldman M, Krienen FM, de Rivera H, Bien E, Baum M,  
1070 Bortolin L, Wang S, Goeva A, Nemesh J, Kamitaki N, Brumbaugh S, Kulp D, McCarroll  
1071 SA (2018) Molecular Diversity and Specializations among the Cells of the Adult Mouse  
1072 Brain. *Cell* 174:1015–1030.e16.
- 1073 Scaplen KM, Kaun KR (2016) Reward from bugs to bipeds: a comparative approach to  
1074 understanding how reward circuits function. *J Neurogenet* 30:133–148.
- 1075 Schall TA, Wright WJ, Dong Y (2020) Nucleus accumbens fast-spiking interneurons in  
1076 motivational and addictive behaviors. *Mol Psychiatry*.
- 1077 Schizophrenia Working Group of the Psychiatric Genomics Consortium (2014) Biological



- 1078 insights from 108 schizophrenia-associated genetic loci. *Nature* 511:421–427.
- 1079 Shlyueva D, Stampfel G, Stark A (2014) Transcriptional enhancers: from properties to genome-  
1080 wide predictions. *Nat Rev Genet* 15:272–286.
- 1081 Smith LN (2018) A disciplined approach to neural network hyper-parameters: Part 1 -- learning  
1082 rate, batch size, momentum, and weight decay. *arXiv*.
- 1083 Tak YG, Farnham PJ (2015) Making sense of GWAS: using epigenomics and genome  
1084 engineering to understand the functional relevance of SNPs in non-coding regions of the  
1085 human genome. *Epigenetics Chromatin* 8:57.
- 1086 Tepper JM, Koós T (2017) Gabaergic interneurons of the striatum. In: *Handbook of basal  
1087 ganglia structure and function, second edition*, pp 157–178 *Handbook of behavioral  
1088 neuroscience*. Elsevier.
- 1089 Tewhey R, Kotliar D, Park DS, Liu B, Winnicki S, Reilly SK, Andersen KG, Mikkelsen TS,  
1090 Lander ES, Schaffner SF, Sabeti PC (2016) Direct Identification of Hundreds of  
1091 Expression-Modulating Variants using a Multiplexed Reporter Assay. *Cell* 165:1519–  
1092 1529.
- 1093 Thurman RE et al. (2012) The accessible chromatin landscape of the human genome. *Nature*  
1094 489:75–82.
- 1095 Vockley CM, Guo C, Majoros WH, Nodzenski M, Scholtens DM, Hayes MG, Lowe WL, Reddy  
1096 TE (2015) Massively parallel quantification of the regulatory effects of noncoding  
1097 genetic variation in a human cohort. *Genome Res* 25:1206–1214.
- 1098 Volkow ND, Chang L, Wang G-J, Fowler JS, Ding Y-S, Sedler M, Logan J, Franceschi D,  
1099 Gatley J, Hitzemann R, Gifford A, Wong C, Pappas N (2003) Low level of brain  
1100 dopamine d<sub>2</sub> receptors in methamphetamine abusers: association with metabolism in the  
1101 orbitofrontal cortex. *Focus (Madison)* 1:150–157.
- 1102 Volkow ND, Morales M (2015) The brain on drugs: from reward to addiction. *Cell* 162:712–  
1103 725.
- 1104 Volkow ND, Wang GJ, Fowler JS, Logan J, Gatley SJ, Hitzemann R, Chen AD, Dewey SL,  
1105 Pappas N (1997) Decreased striatal dopaminergic responsiveness in detoxified cocaine-  
1106 dependent subjects. *Nature* 386:830–833.
- 1107 Volkow ND, Wang GJ, Fowler JS, Logan J, Hitzemann R, Ding YS, Pappas N, Shea C, Piscani  
1108 K (1996) Decreases in dopamine receptors but not in dopamine transporters in alcoholics.  
1109 *Alcohol Clin Exp Res* 20:1594–1598.
- 1110 Volkow ND, Wang G-J, Tomasi D, Baler RD (2013) Unbalanced neuronal circuits in addiction.  
1111 *Curr Opin Neurobiol* 23:639–648.
- 1112 Waaktaar T, Kan K-J, Torgersen S (2018) The genetic and environmental architecture of  
1113 substance use development from early adolescence into young adulthood: a longitudinal  
1114 twin study of comorbidity of alcohol, tobacco and illicit drug use. *Addiction* 113:740–  
1115 748.
- 1116 Wang GJ, Volkow ND, Fowler JS, Logan J, Abumrad NN, Hitzemann RJ, Pappas NS, Pascani K  
1117 (1997) Dopamine D<sub>2</sub> receptor availability in opiate-dependent subjects before and after  
1118 naloxone-precipitated withdrawal. *Neuropsychopharmacology* 16:174–182.
- 1119 Wang J, Huang D, Zhou Y, Yao H, Liu H, Zhai S, Wu C, Zheng Z, Zhao K, Wang Z, Yi X,  
1120 Zhang S, Liu X, Liu Z, Chen K, Yu Y, Sham PC, Li MJ (2020) CAUSALdb: a database  
1121 for disease/trait causal variants identified using summary statistics of genome-wide  
1122 association studies. *Nucleic Acids Res* 48:D807–D816.
- 1123 Wang K, Li M, Hakonarson H (2010) ANNOVAR: functional annotation of genetic variants

- 1124 from high-throughput sequencing data. *Nucleic Acids Res* 38:e164.
- 1125 Watanabe K, Taskesen E, van Bochoven A, Posthuma D (2017) Functional mapping and  
1126 annotation of genetic associations with FUMA. *Nat Commun* 8:1826.
- 1127 Wilar G, Shinoda Y, Sasaoka T, Fukunaga K (2019) Crucial Role of Dopamine D2 Receptor  
1128 Signaling in Nicotine-Induced Conditioned Place Preference. *Mol Neurobiol* 56:7911–  
1129 7928.
- 1130 Wiltschko AB, Pettibone JR, Berke JD (2010) Opposite effects of stimulant and antipsychotic  
1131 drugs on striatal fast-spiking interneurons. *Neuropsychopharmacology* 35:1261–1270.
- 1132 Worsley Hunt R, Mathelier A, Del Peso L, Wasserman WW (2014) Improving analysis of  
1133 transcription factor binding sites within ChIP-Seq data based on topological motif  
1134 enrichment. *BMC Genomics* 15:472.
- 1135 Xu Z, Liang Q, Song X, Zhang Z, Lindtner S, Li Z, Wen Y, Liu G, Guo T, Qi D, Wang M,  
1136 Wang C, Li H, You Y, Wang X, Chen B, Feng H, Rubenstein JL, Yang Z (2018) SP8 and  
1137 SP9 coordinately promote D2-type medium spiny neuron production by activating Six3  
1138 expression. *Development* 145.
- 1139 Yue F et al. (2014) A comparative encyclopedia of DNA elements in the mouse genome. *Nature*  
1140 515:355–364.
- 1141 Zeng X, Liu D, Zhao X, Chao L, Li Y, Li H, Li W, Gui L, Wu W (2019) Association of bone  
1142 mineral density with lung function in a Chinese general population: the Xinxiang rural  
1143 cohort study. *BMC Pulm Med* 19:239.
- 1144 Zhang X, Kaplow IM, Wirthlin M, Park TY, Pfenning AR (2020) HALPER facilitates the  
1145 identification of regulatory element orthologs across species. *Bioinformatics*.
- 1146 Zhou J, Troyanskaya OG (2015) Predicting effects of noncoding variants with deep learning-  
1147 based sequence model. *Nat Methods* 12:931–934.
- 1148 Zillikens MC et al. (2017) Large meta-analysis of genome-wide association studies identifies  
1149 five loci for lean body mass. *Nat Commun* 8:80.
- 1150

1151 **Figure 1. Substance use and risky behavior GWAS risk variants enrich within reward**  
1152 **region- and cell type-specific epigenomic profiles.**

1153 Partitioned LDSC regression (GWAS enrichment) finds enrichment of substance use and risky  
1154 behavior traits in region-specific and cell type-specific open chromatin profiles of human  
1155 postmortem brain. **(A)** Pie chart of ANNOVAR-annotated(Wang et al., 2010) SNP function of  
1156 addiction-associated trait lead and off-lead SNPs in LD  $R^2 > 0.8$ . Dark colors indicate un-  
1157 transcribed/non-coding annotations, light for transcribed/exonic annotations. SNP annotation  
1158 labels are according to ANNOVAR using ENSEMBL build 85 gene annotations (Methods). **(B)**  
1159 GWAS enrichment false-discovery rates in ATAC-seq of 14 postmortem human brain regions  
1160 coupled with NeuN-labeled fluorescence activated nuclei sorting(Fullard et al., 2018). Brain  
1161 regions are stratified by cortical and subcortical regions, with cortical regions ordered frontal to  
1162 caudal. Sorted cell types within each brain region are denoted by shape (blue triangle for  
1163 NeuN+/neuronal, red circle for NeuN-/glial). FDR-adjustment was performed across all  
1164 enrichments on the Fullard *et al.* dataset for Figure 1A and Figure 3: **Cell type-specific machine**  
1165 **learning models refine human NeuN+ enrichments for substance use genetic risk GWAS.**

1166 **(A)** Scheme to predict cell type-specific activity of NeuN+ ATAC-seq peaks enriched from brain  
1167 regions assayed in Fullard *et al.* (Fullard et al., 2018) using ML models trained on mouse cell-type  
1168 specific ATAC-seq peaks. ML-predicted OCRs are input into GWAS enrichment. **(B)** Partitioned  
1169 LD score regression of addiction associated traits in Fullard *et al.* NeuN+ OCRs predicted to be  
1170 cell type-specific by machine learning models of open chromatin. Cell types are colored by the  
1171 source mouse cell type-specific OCRs from **Error! Reference source not found.** **A.** Original  
1172 enrichments from Figure 1A are reproduced in black. Bolded points are significant for  $FDR < 0.05$ .

1173

1174 **Figure 4: Machine learning (ML) models for predicting cell type-specific open chromatin**  
1175 **predict activity of addiction GWAS SNPs**

1176 **(A)** Cell type-activity prediction scores from the effect allele of genome-wide significant lead  
1177 SNPs and off-lead SNPs in LD  $R^2 > 0.8$ . Activity scores for SNPs are stratified by overlap with  
1178 Fullard *et al.* (Fullard et al., 2018) cortical or striatal NeuN+ and NeuN- peaks. Significance  
1179 symbols denote Bonferroni-adjusted p-values from 2-tailed t-tests for N=18 possible pairwise  
1180 comparisons, N.S. not significant, \*  $P < 0.05/N$ , \*\*  $P < 0.01/N$ , \*\*\*  $P < 0.001/N$ . **(B)** Locus plot  
1181 candidate SNP with predicted function SNP impact in EXC, D1, and D2 cell types. Genome tracks  
1182 from top to bottom: NeuN+ MACS2 ATAC-seq foldchange signal of regions enriched in Figure  
1183 1A, SNP tracks showing SNP filtering criteria down to candidate functional SNP (Methods), gene  
1184 annotation tracks from GENCODE GRCh38, eQTL link tracks of FDR-significant GTEx cis-  
1185 eQTL from cortical and striatal brains, and mouse-human orthologous putative CREs mapped from  
1186 cSNAIL ATAC-seq. NeuN+ ATAC-seq tracks and eQTL links are colored by source brain region  
1187 as cortical (teal) or striatal (blue). Cell types colors label cortical excitatory neurons (EXC; red),  
1188 D1 medium spiny neurons (D1; blue), or D2 medium spiny neurons (D2; green).

1189

1190 **Figure 5 Summary of LDSC GWAS enrichments in human and mouse-human orthologous**  
1191 **bulk tissue and cell type open chromatin**

1192 **(A)** Schematic of human NeuN-labeled bulk tissue and occipital cortex cell types from **Figure 1**  
1193 for which addiction-associated genetic variants were significantly enriched ( $FDR < 0.05$ ) in OCRs.  
1194 Brain regions are labelled by the cell type that enriched (NeuN+ : blue box/shading; NeuN- : red  
1195 box/shading) spatially along with the trait(s) for which OCRs were found significantly enriched



1196 with risk variants. Occipital cortex cell types from **Figure 1C** (same color scheme) are listed along  
1197 with the trait(s) for which OCRs were found significantly enriched with risk variants. **(B)**  
1198 Schematic of addiction-associated genetic variants that share enrichments from human brain  
1199 regions and neuronal subtypes in both human and mouse-human orthologous open chromatin.  
1200 Brain graphic adapted from Fullard *et al.*(Fullard et al., 2018)

1201

1202 **Supplemental Figure 1. Shared and unique genetic architecture of genetic risk variants of**  
1203 **addiction-associated traits.**

1204 **(A)** LDSC genetic correlation ( $r_g$ ) matrix of seven addiction-associated traits. FDR-significant  
1205 correlations at shown in bold, non-significant in gray (FDR < 0.05). **(B)** Upset plot of genomic  
1206 loci shared or unique to each addiction-associated trait. Genomic loci are identified by shared  
1207 GWAS-significant SNPs and genomic region overlap.

1208

1209

1210 **Supplemental Figure . (C)** GWAS enrichment false-discovery rates in single cell THS-seq OCRs  
1211 of major cell clusters in occipital cortex(Lake et al., 2018). Cell types in brain regions that are  
1212 enriched at FDR < 0.05 are plotted with bigger shapes and with black outlines. Traits assessed are  
1213 age of smoking initiation (AgeofInitiation), average number of cigarettes per day for ever smokers  
1214 (CigarettesPerDay), having ever regularly smoked (Smoking Initiation), current versus former  
1215 smokers (SmokingCessation), number of alcoholic drinks per week (DrinksPerWeek)(Liu et al.,  
1216 2019b), lifetime cannabis use (Cannabis)(Pasman et al., 2018), and risky behavior  
1217 (RiskyBehavior)(Karlsson Linnér et al., 2019). OFC: orbitofrontal cortex, VLPFC: ventrolateral  
1218 prefrontal cortex, DLPFC: dorsolateral prefrontal cortex, ACC: anterior cingulate cortex, INS:

1219 insula, STC: superior temporal gyrus, ITC: inferior temporal gyrus, PMC: primary motor cortex,  
1220 PVC: primary visual cortex, AMY: amygdala, HIPP: hippocampus, MDT: mediodorsal thalamus,  
1221 NAc: nucleus accumbens, PUT: putamen, Ast: astrocyte, End: endothelial, Ex: excitatory neuron,  
1222 In: inhibitory neuron, Mic: microglia, Oli: oligodendrocyte, Opc: oligodendrocyte precursor.

1223

1224 **Figure 2: Cell type-specific enrichment of substance use traits are conserved in mouse-**  
1225 **human orthologous open chromatin regions.**

1226 **(A)** Experimental design to map human orthologous regions from mouse ATAC-seq of bulk cortex  
1227 (CTX), dorsal striatum (CPU), and nucleus accumbens (NAc) of cre-dependent Sun1-GFP Nuclear  
1228 Anchored Independent Labeled (cSNAIL) nuclei of D1-cre, D2-cre, PV-cre, and SST-cre mice.  
1229 cSNAIL ATAC-seq experiments report enriched (+) nuclei populations. **(B)** Partitioned LD score  
1230 regression finds enrichment of substance use and risky behavior traits for brain region and cell  
1231 type specific ATAC-seq open chromatin profiles of mouse brain. Replication of enrichment is  
1232 shown using INTACT-enriched OCRs from Mo *et al*(Mo et al., 2015) of cortical excitatory  
1233 (EXC+), vasoactive intestinal peptide interneuron (VIP+), and parvalbumin interneuron (PV+).  
1234 Enrichments that are enriched at FDR < 0.05 are plotted with black outlines. FDR-adjusted p-value  
1235 was performed across all mouse-human ortholog GWAS enrichment across Figure 2.

1236

1237 **Figure 3: Cell type-specific machine learning models refine human NeuN+ enrichments for**  
1238 **substance use genetic risk GWAS.**

1239 **(A)** Scheme to predict cell type-specific activity of NeuN+ ATAC-seq peaks enriched from brain  
1240 regions assayed in Fullard *et al.* (Fullard et al., 2018) using ML models trained on mouse cell-type  
1241 specific ATAC-seq peaks. ML-predicted OCRs are input into GWAS enrichment. **(B)** Partitioned

1242 LD score regression of addiction associated traits in Fullard *et al.* NeuN+ OCRs predicted to be  
1243 cell type-specific by machine learning models of open chromatin. Cell types are colored by the  
1244 source mouse cell type-specific OCRs from **Error! Reference source not found.A**. Original  
1245 enrichments from Figure 1A are reproduced in black. Bolded points are significant for FDR < 0.05.

1246

1247 **Figure 4: Machine learning (ML) models for predicting cell type-specific open chromatin**  
1248 **predict activity of addiction GWAS SNPs**

1249 **(A)** Cell type-activity prediction scores from the effect allele of genome-wide significant lead  
1250 SNPs and off-lead SNPs in LD  $R^2 > 0.8$ . Activity scores for SNPs are stratified by overlap with  
1251 Fullard *et al.* (Fullard et al., 2018) cortical or striatal NeuN+ and NeuN- peaks. Significance  
1252 symbols denote Bonferroni-adjusted p-values from 2-tailed t-tests for N=18 possible pairwise  
1253 comparisons, N.S. not significant, \* P < 0.05/N, \*\* P < 0.01/N, \*\*\* P < 0.001/N. **(B)** Locus plot  
1254 candidate SNP with predicted function SNP impact in EXC, D1, and D2 cell types. Genome tracks  
1255 from top to bottom: NeuN+ MACS2 ATAC-seq foldchange signal of regions enriched in Figure  
1256 1A, SNP tracks showing SNP filtering criteria down to candidate functional SNP (Methods), gene  
1257 annotation tracks from GENCODE GRCh38, eQTL link tracks of FDR-significant GTEx cis-  
1258 eQTL from cortical and striatal brains, and mouse-human orthologous putative CREs mapped from  
1259 cSNAIL ATAC-seq. NeuN+ ATAC-seq tracks and eQTL links are colored by source brain region  
1260 as cortical (teal) or striatal (blue). Cell types colors label cortical excitatory neurons (EXC; red),  
1261 D1 medium spiny neurons (D1; blue), or D2 medium spiny neurons (D2; green).

1262

1263 **Figure 5 Summary of LDSC GWAS enrichments in human and mouse-human orthologous**  
1264 **bulk tissue and cell type open chromatin**

1265 **(A)** Schematic of human NeuN-labeled bulk tissue and occipital cortex cell types from **Figure 1**  
1266 for which addiction-associated genetic variants were significantly enriched ( $FDR < 0.05$ ) in OCRs.  
1267 Brain regions are labelled by the cell type that enriched (NeuN+ : blue box/shading; NeuN- : red  
1268 box/shading) spatially along with the trait(s) for which OCRs were found significantly enriched  
1269 with risk variants. Occipital cortex cell types from **Figure 1C** (same color scheme) are listed along  
1270 with the trait(s) for which OCRs were found significantly enriched with risk variants. **(B)**  
1271 Schematic of addiction-associated genetic variants that share enrichments from human brain  
1272 regions and neuronal subtypes in both human and mouse-human orthologous open chromatin.  
1273 Brain graphic adapted from Fullard *et al.* (Fullard et al., 2018)

1274

1275 **Supplemental Figure 1. Shared and unique genetic architecture of genetic risk variants of**  
1276 **addiction-associated traits.**

1277 **(A)** LDSC genetic correlation ( $r_g$ ) matrix of seven addiction-associated traits. FDR-significant  
1278 correlations are shown in bold, non-significant in gray ( $FDR < 0.05$ ). **(B)** Upset plot of genomic  
1279 loci shared or unique to each addiction-associated trait. Genomic loci are identified by shared  
1280 GWAS-significant SNPs and genomic region overlap.

1281

1282

1283 **Supplemental Figure 2. Sensitivity of partitioned LDSC regression for cell type- and region-**  
1284 **specific in the GWAS trait enrichment requires well-powered GWAS in relevant cell types.**

1285 GWAS enrichment plots with false-discovery rates in ATAC-seq of 14 postmortem human brain  
1286 regions coupled with NeuN-labeled fluorescence activated nuclei sorting(Fullard et al., 2018).  
1287 Regions are stratified by cortical and subcortical regions, with cortical regions ordered frontal to  
1288 caudal. Sorted cell types within each brain region are denoted by shape (blue triangle for  
1289 NeuN+/neuronal, red circle for NeuN-/glial). Cell types in brain regions that are enriched at FDR  
1290  $< 0.05$  are plotted with bigger shapes and with black outlines. **(A)** GWAS enrichment of addiction-  
1291 or substance use-associated traits: multi-site chronic pain (ChronicPain)(Johnston et al., 2019),  
1292 cocaine dependence (CocaineDep)(Cabana-Domínguez et al., 2019) , opioid dependence  
1293 (OpioidDep)(Cheng et al., 2018), diagnosis of obsessive-compulsive disorder (OCD)(International  
1294 Obsessive Compulsive Disorder Foundation Genetics Collaborative (IOCDF-GC) and OCD  
1295 Collaborative Genetics Association Studies (OCGAS), 2018), and cups of coffee drank per day  
1296 (CoffeePerDay)(Coffee and Caffeine Genetics Consortium et al., 2015). The GWAS for OCD,  
1297 opioid dependence, and cocaine dependence are reportedly underpowered to detect genetic  
1298 liability for these traits ( $N_{\text{case}} < 5,000$ ). **(B)** GWAS enrichment in well-powered brain-related traits  
1299 show cell type- and region-specific enrichment: educational attainment (EduAttain)(Lee et al.,  
1300 2018), schizophrenia risk (Schizophrenia)(Schizophrenia Working Group of the Psychiatric  
1301 Genomics Consortium, 2014), habitual sleep duration (SleepDuration)(Dashti et al., 2019). **(C)**  
1302 GWAS enrichment in non-brain associated traits do not show cell type- or region-specific  
1303 enrichment: heel bone-mineral density (BMD)(Kemp et al., 2017), coronary artery disease  
1304 (CAD)(Howson et al., 2017), and lean body mass (LBM)(Zillikens et al., 2017).

1305

1306 **Supplemental Figure 3. Cell type specificity of cSNAIL ATAC-seq in mouse cortex and**  
1307 **striatum**

1308 (A) Principle component plots of chromatin accessibility counts from cre-dependent Sun1-GFP  
1309 Nuclear Anchored Independent Labeled (cSNAIL) ATAC-seq from *cre*-driver lines (**Methods**).  
1310 Major axes of variation separate cell types by tissue source (PC1) and cell type versus bulk ATAC-  
1311 seq (PC2). (B) Normalized coverage track plots around marker genes demarcating cell type-  
1312 specificity of cSNAIL ATAC-seq samples. (C) Density correlation plot of normalized chromatin  
1313 accessibility log counts around the transcription start site (TSS) with matched pseudo-bulk cell  
1314 type log gene counts from Drop-seq of mouse cortex and striatum (Saunders et al., 2018). Drop-  
1315 seq cell types meta-gene profiles report sum gene counts for cell clusters from frontal cortex and  
1316 striatum. Pearson's and Spearman's correlation are denoted with  $R$  and  $\rho$ , respectively. (D)  
1317 Pairwise correlation matrix of TSS chromatin accessibility log counts with Drop-seq pseudo-bulk  
1318 log gene counts from cortical and striatal cell clusters.

1319  
1320

1321 **Supplemental Figure 4. GWAS enrichment in addiction- and non-addiction-related traits**  
1322 **using mapped mouse orthologs of tissue- and cell type-specific open chromatin regions.**

1323 GWAS enrichment plots with false-discovery rates in human orthologous regions mapped from  
1324 mouse ATAC-seq of bulk cortex (CTX), dorsal striatum (CPU), and nucleus accumbens (Nac) or  
1325 cre-dependent Sun1-GFP Nuclear Anchored Independent Labeled (cSNAIL) nuclei of D1-cre, D2-  
1326 cre, and PV-cre mice. cSNAIL ATAC-seq experiments report both enriched (+) and de-enriched  
1327 (-) nuclei populations. Enrichments that are enriched at  $FDR < 0.05$  are plot with black outlines.  
1328 Replication of enrichment is shown using INTACT-enriched OCRs from Mo *et al* (Mo et al., 2015)  
1329 of cortical excitatory (EXC+), vasoactive intestinal peptide interneuron (VIP+), and parvalbumin  
1330 interneuron (PV+). (A) GWAS enrichment of addiction- or substance use-associated traits: multi-  
1331 site chronic pain (ChronicPain), cocaine dependence (CocaineDep), opioid dependence

1332 (OpioidDep), diagnosis of obsessive-compulsive disorder (OCD), and cups of coffee drank per  
1333 day (CoffeePerDay). The GWAS for OCD, opioid dependence, and cocaine dependence are  
1334 reportedly underpowered to detect genetic liability for these traits ( $N_{\text{case}} < 5,000$ ). **(B)** GWAS  
1335 enrichment in well-powered brain-related traits show cell type- and region-specific enrichment:  
1336 educational attainment (EduAttain), schizophrenia risk (Schizophrenia), habitual sleep  
1337 duration (SleepDuration). **(C)** GWAS enrichment in non-brain associated traits do not show  
1338 cell type- or region-specific enrichment: heel bone-mineral density (BMD), coronary artery disease  
1339 (CAD), and lean body mass (LBM). **(D)** Heatmap of LDSC regression coefficients of GWAS  
1340 enrichment for all measured GWAS in non-brain OCRs from human or mouse-human mapped  
1341 orthologs. Tissues for which OCRs are significantly enriched ( $\text{FDR} < 0.05$ ) with GWAS variants  
1342 are outlined with a bolded box.

1343

1344 **Supplemental Figure 5. ML model performance and selection of candidate functional SNPs.**

1345 **(A)** Performance metrics for machine learning (ML) models evaluated on the test sets of IDR peaks  
1346 or 10x nucleotide-distribution matched negatives. Five-fold cross validation scheme was used to  
1347 train on IDR peaks of each cell type and tissue. Performance metrics are reported for accuracy  
1348 and F1-score (using threshold = 0.5) and area under the receiver-operator-characteristic (auROC)  
1349 and the precision-recall curve (auPRC) **(Methods)**. Models were trained on IDR peaks of mouse  
1350 cortical excitatory and striatal D1 and D2 medium spiny neurons. **(B)** Selection criteria from  
1351 addiction-associated trait SNPs to candidate SNPs with functional impact in gene-regulatory  
1352 function.

1353

1354 **Supplemental Figure 6. Locus plots of addiction-associated SNPs predicted to act in striatal**  
1355 **and cortical cell types.**

1356 (A-D) Locus plot of candidate SNP with predicted function SNP impact in D1 or D2 cell types.  
1357 Genome tracks from top to bottom: NeuN+ MACS2 ATAC-seq foldchange signal of regions  
1358 enriched in Figure 1A, SNP tracks showing SNP filtering criteria down to candidate functional  
1359 SNP (Methods), gene annotation tracks from GENCODE GRCh38, eQTL link tracks of FDR-  
1360 significant GTEx cis-eQTL from cortical and striatal brains, and mouse-human orthologous  
1361 putative CREs mapped from cSNAIL ATAC-seq. NeuN+ ATAC-seq tracks and eQTL links are  
1362 colored by source brain region as cortical (teal) or striatal (blue). Cell types colors label cortical  
1363 excitatory neurons (EXC; red), D1 medium spiny neurons (D1; blue), D2 medium spiny neurons  
1364 (D2; green). Panels A and C report SNPs that are known eQTLs in striatal brain tissues. (A)  
1365 rs11191352 (SmokingInitiation), (B) rs10742814 (DrinksPerWeek), (C) rs9844736  
1366 (RiskyBehavior, SmokingInitiation), (D) Two SNPs ~400bp apart, rs6870603 and rs7712167  
1367 (SmokingInitiation).

1368

1369 **Supplemental Table 1. Addiction-associated genetic variants annotated with cell type and**  
1370 **brain region functional markers**

1371 Addiction-associated genetic variants from the seven GWAS explored in this study further  
1372 annotated by FUMA(Watanabe et al., 2017), CAUSALdb(Wang et al., 2020), overlap with NeuN+  
1373 OCRs (Fullard et al., 2018), and ML model open chromatin prediction of the risk and non-risk  
1374 alleles as well as ML model delta SNP scores. Several tabs report FUMA annotations, CAUSAL  
1375 db annotation, SNP overlap with Fullard et al. NeuN+/NeuN- peaks, CNN scores for effect allele,  
1376 CNN scores for non-effect allele, CNN delta SNP scores. All tabs contain unique identifying



1377 columns according to FUMA outputs. Additional columns report HaploReg annotations from these  
1378 SNPs where available data exists. The SNP positions are mapped to report hg38 coordinates and  
1379 GenomicLocus report overlapping loci across. SNP overlaps with NeuN peaks are indicated as 0  
1380 for no overlap and 1 for overlap within IDR peaks. CNN scores are reported average across all  
1381 folds and tissues from the same cell type and tissues. CNN scores range from 0 to 1, with scores  
1382 larger than 0.5 are predicted active in that cell type. Delta SNP scores, instead, are normally  
1383 distributed and centered at 0.

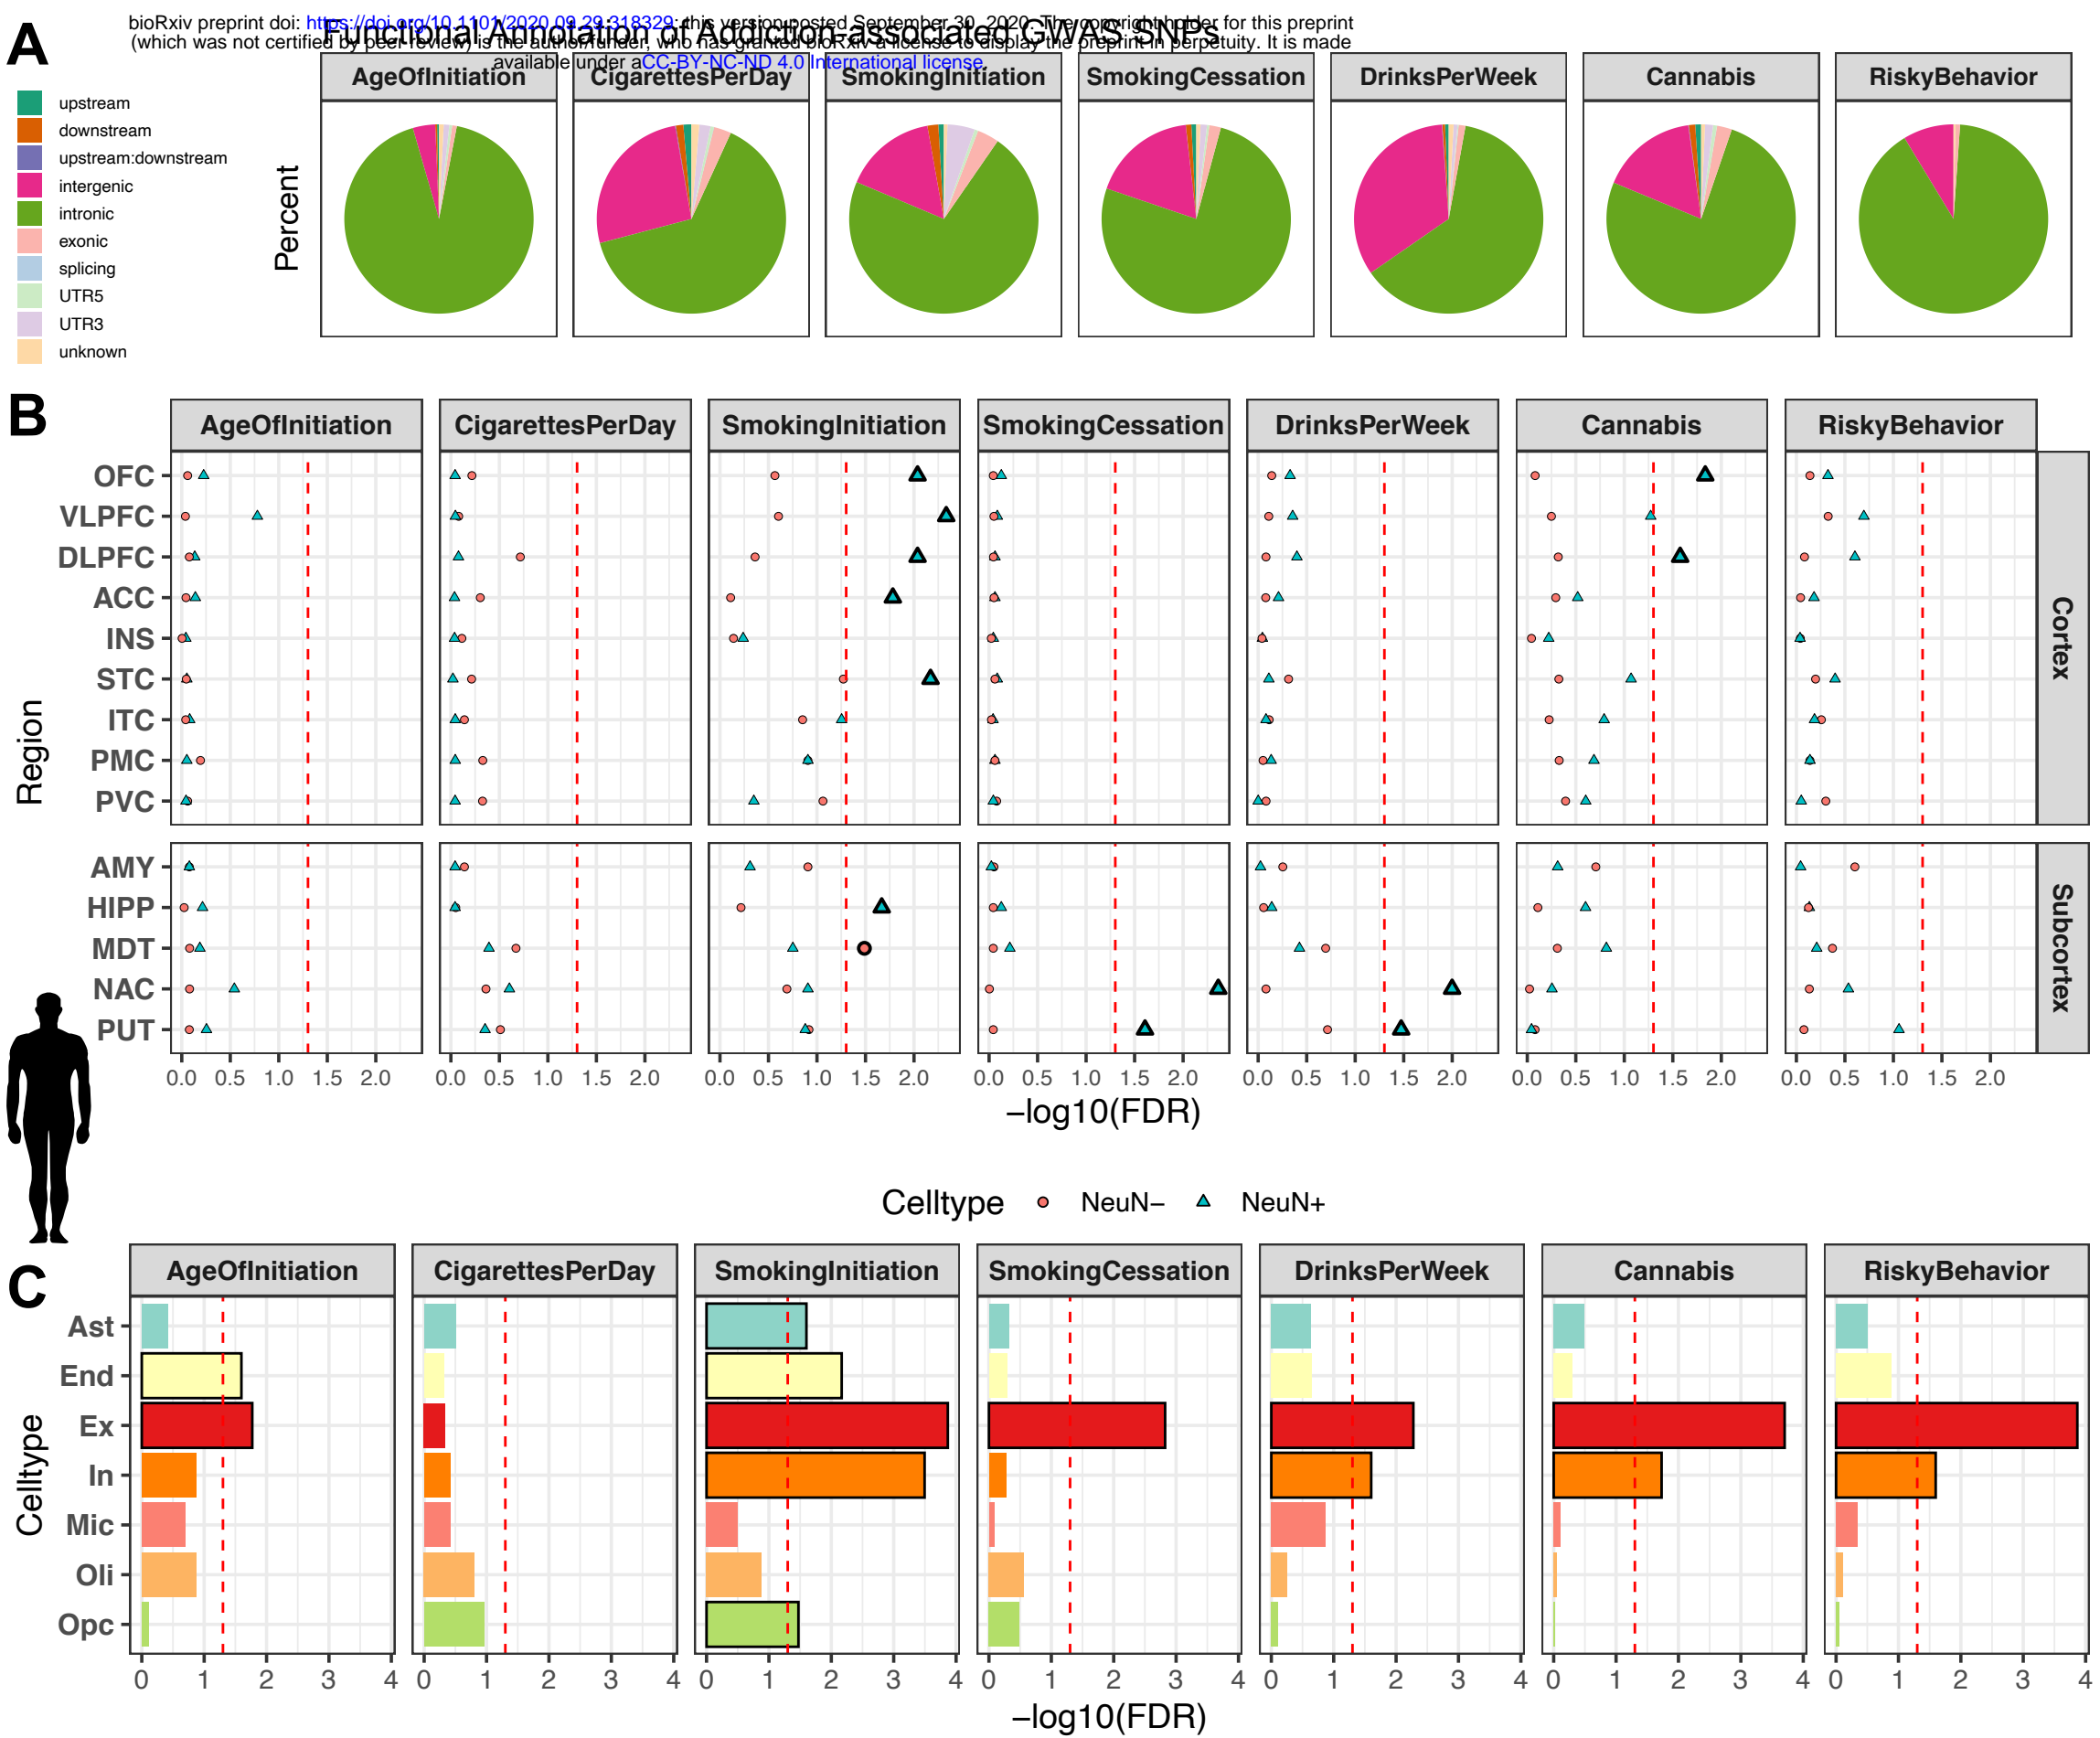

Figure 1

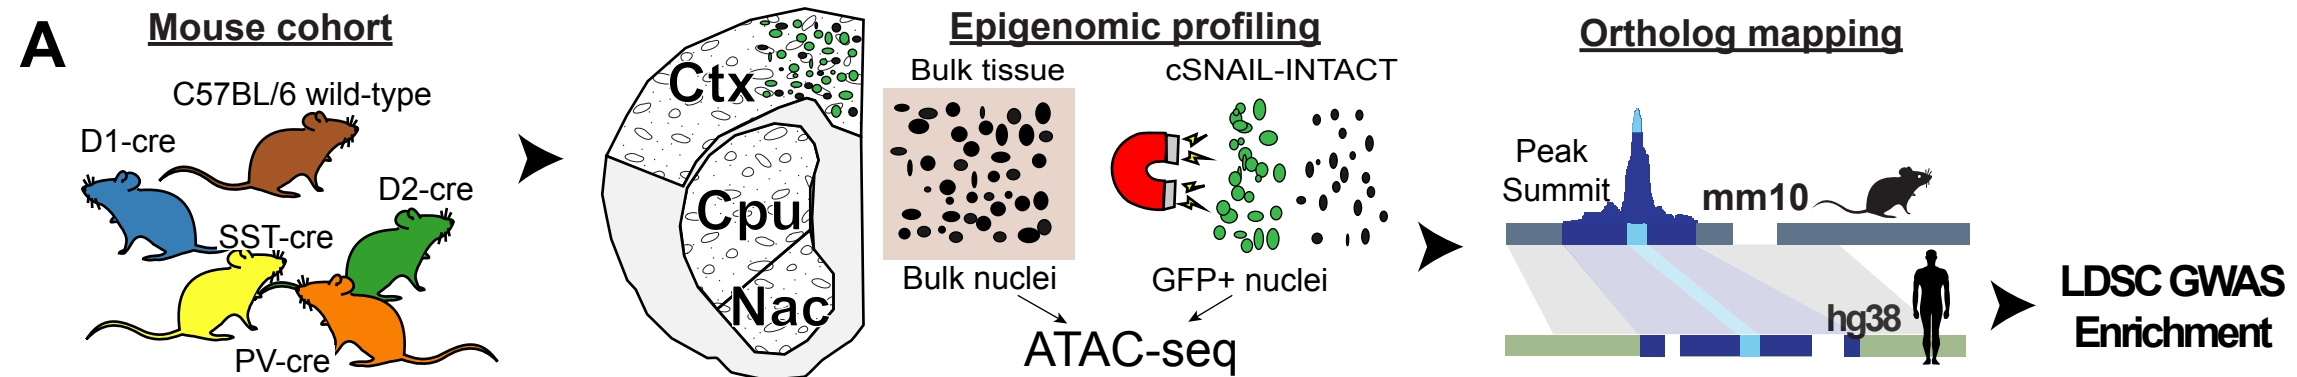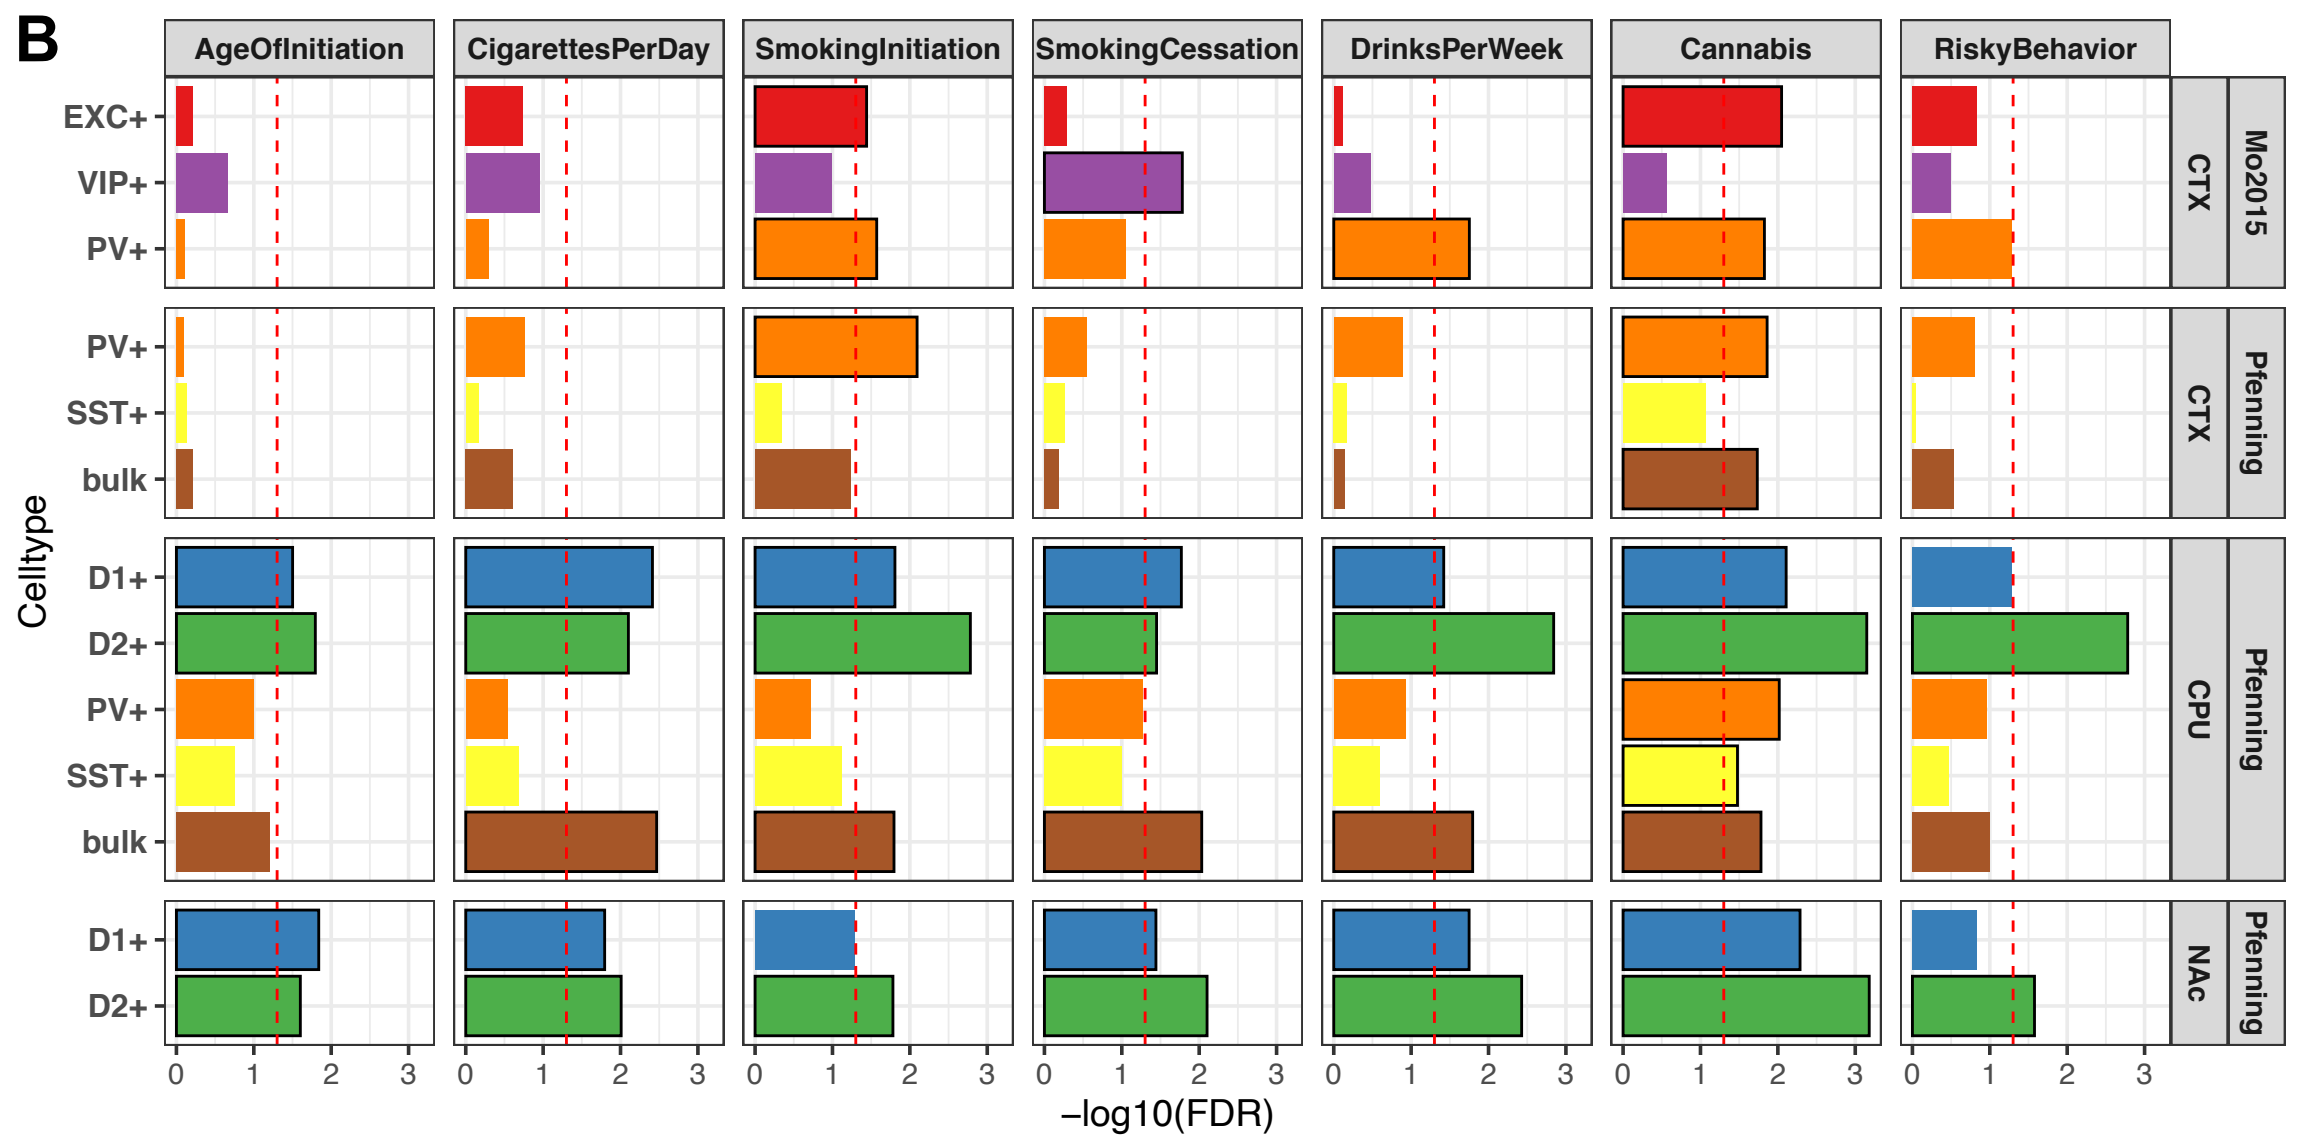

Figure 2

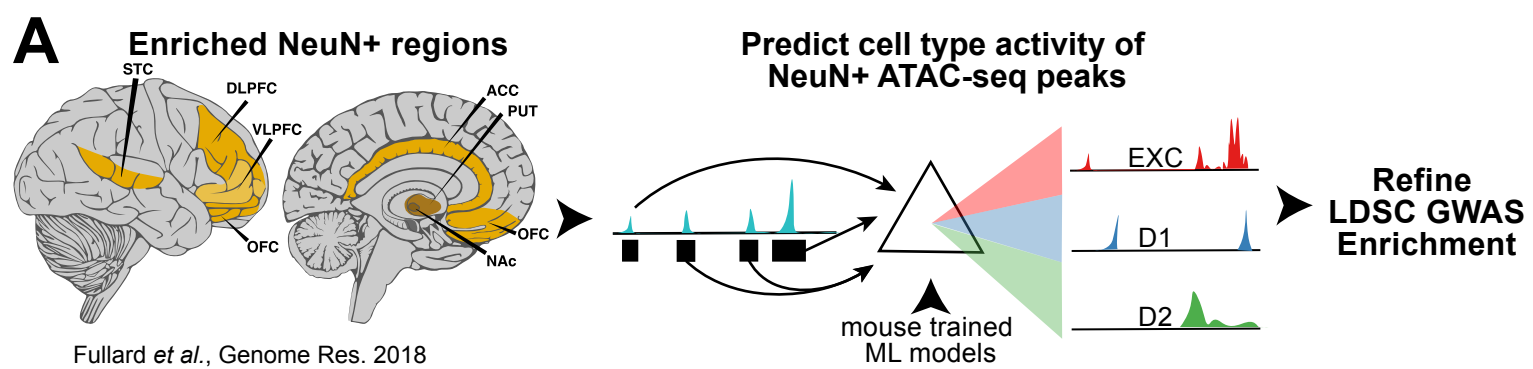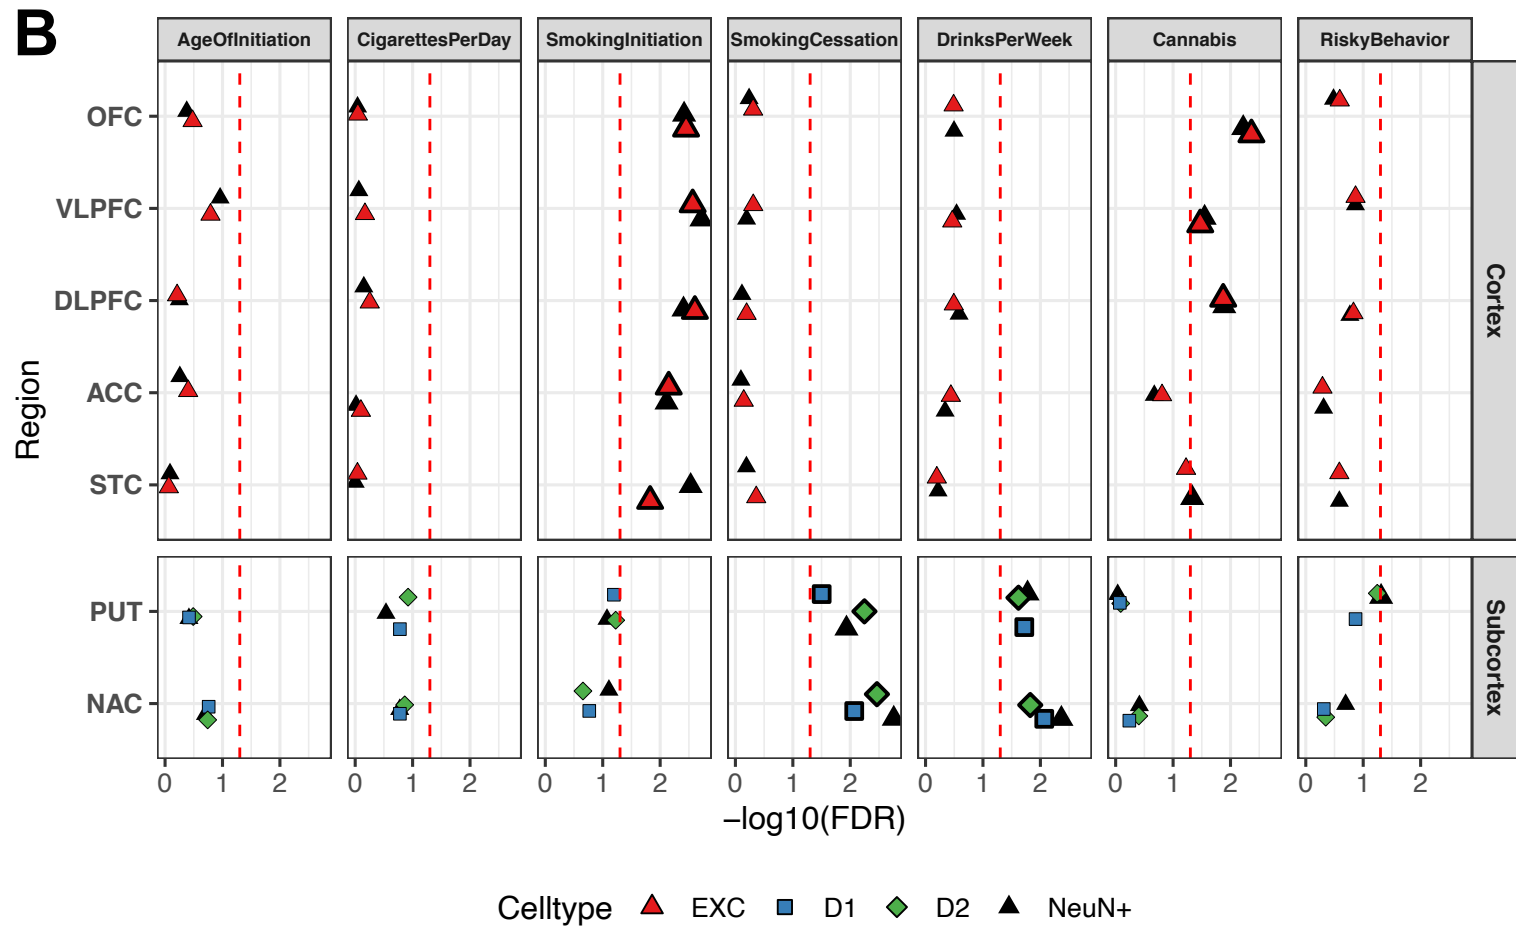

Figure 3

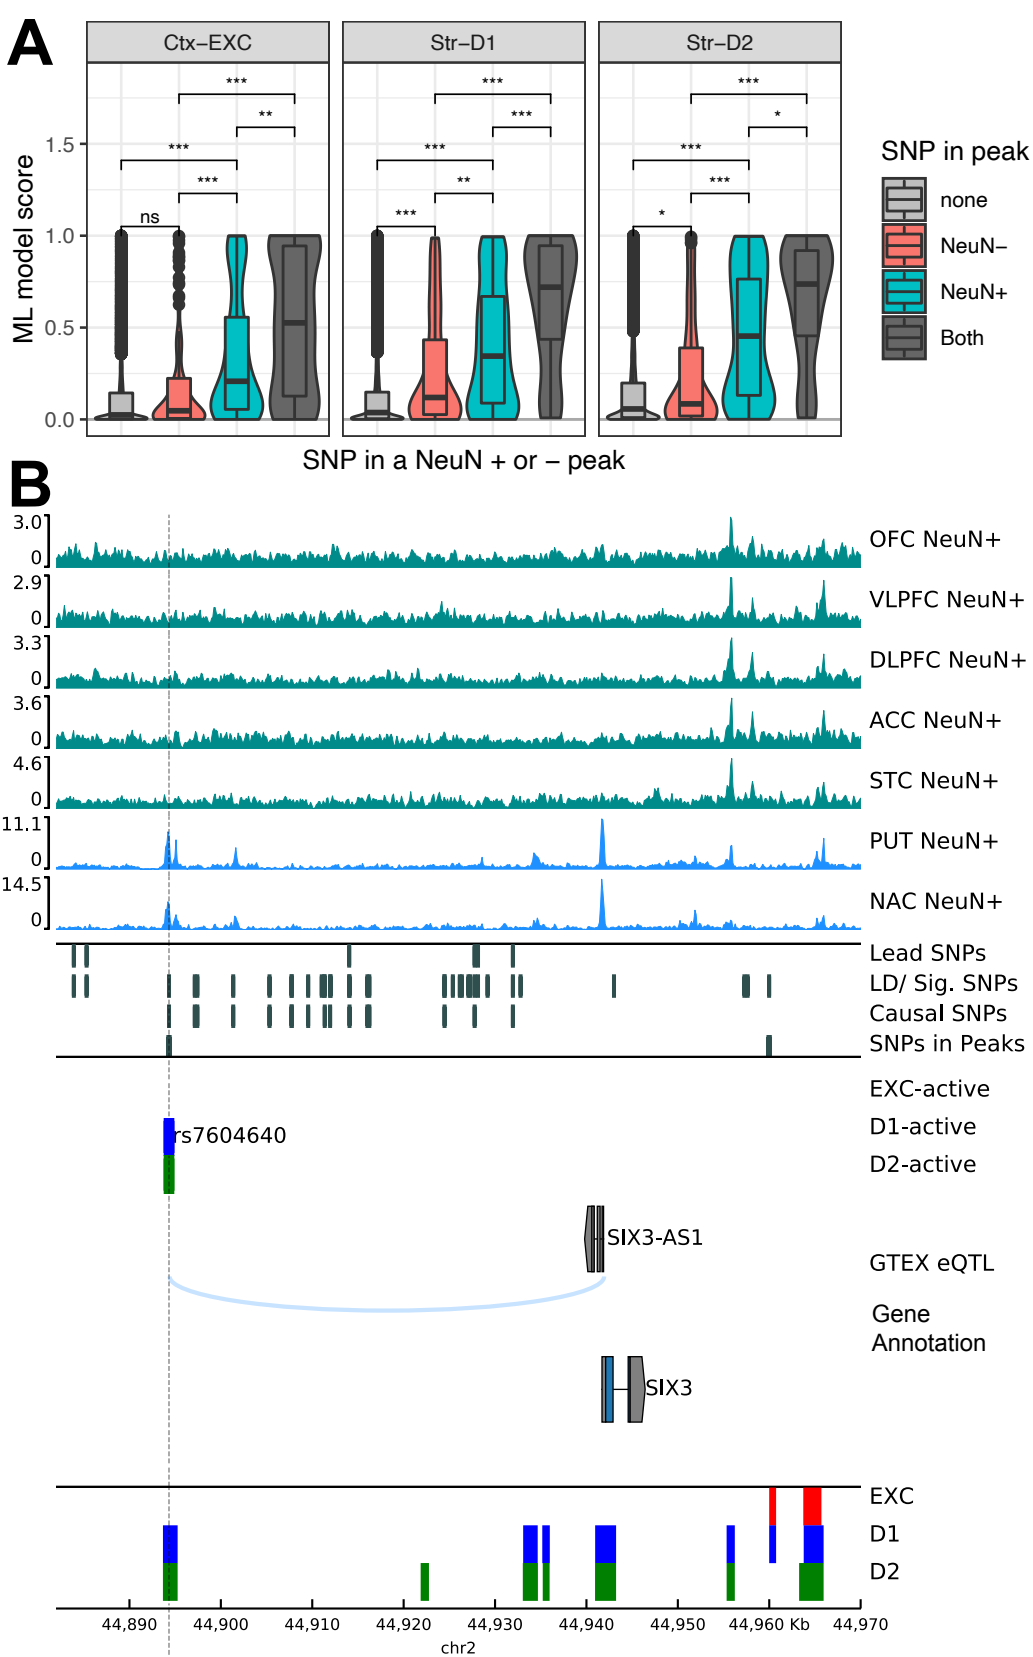

Figure 4

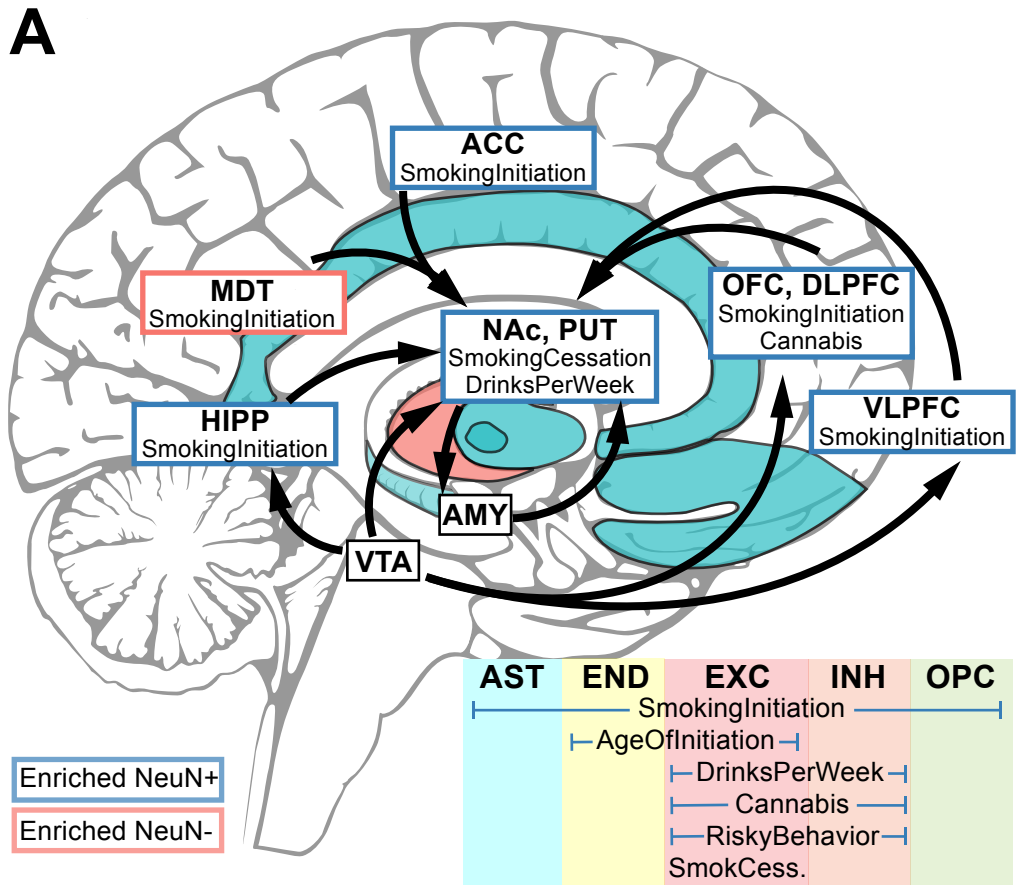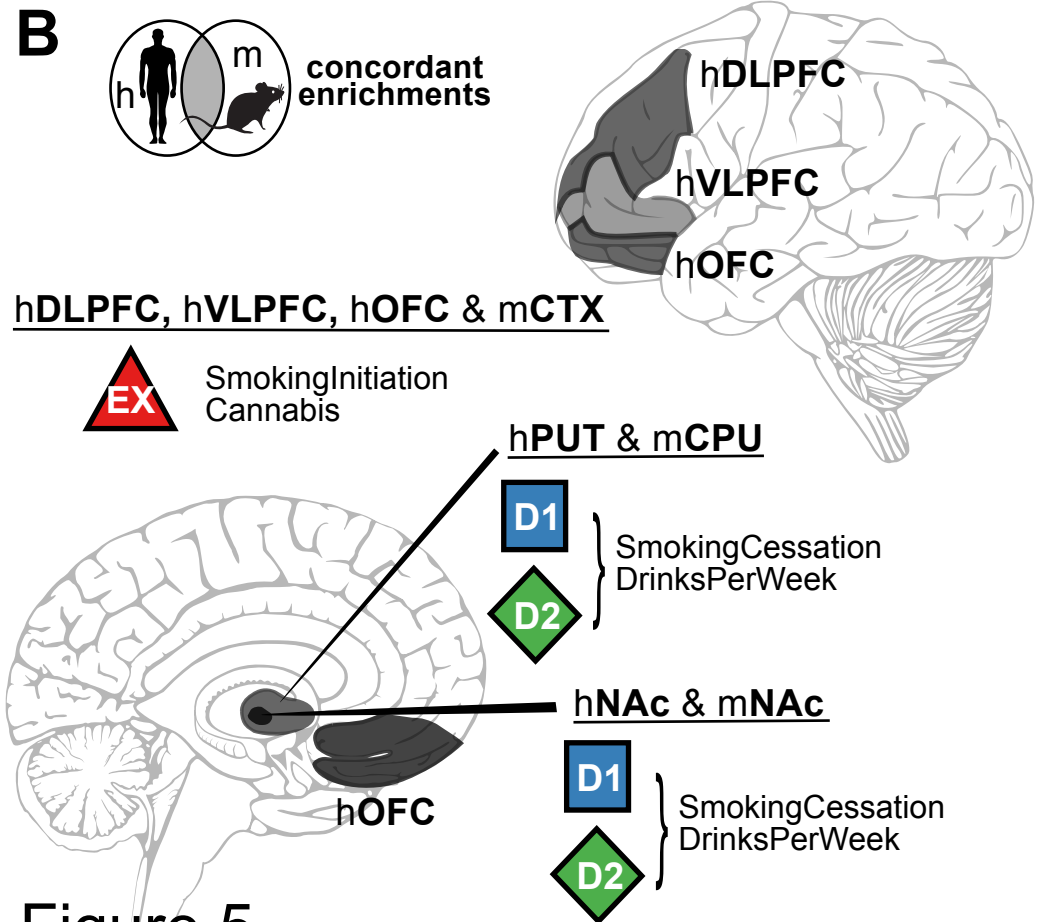

Figure 5

# A Shared genetic architecture

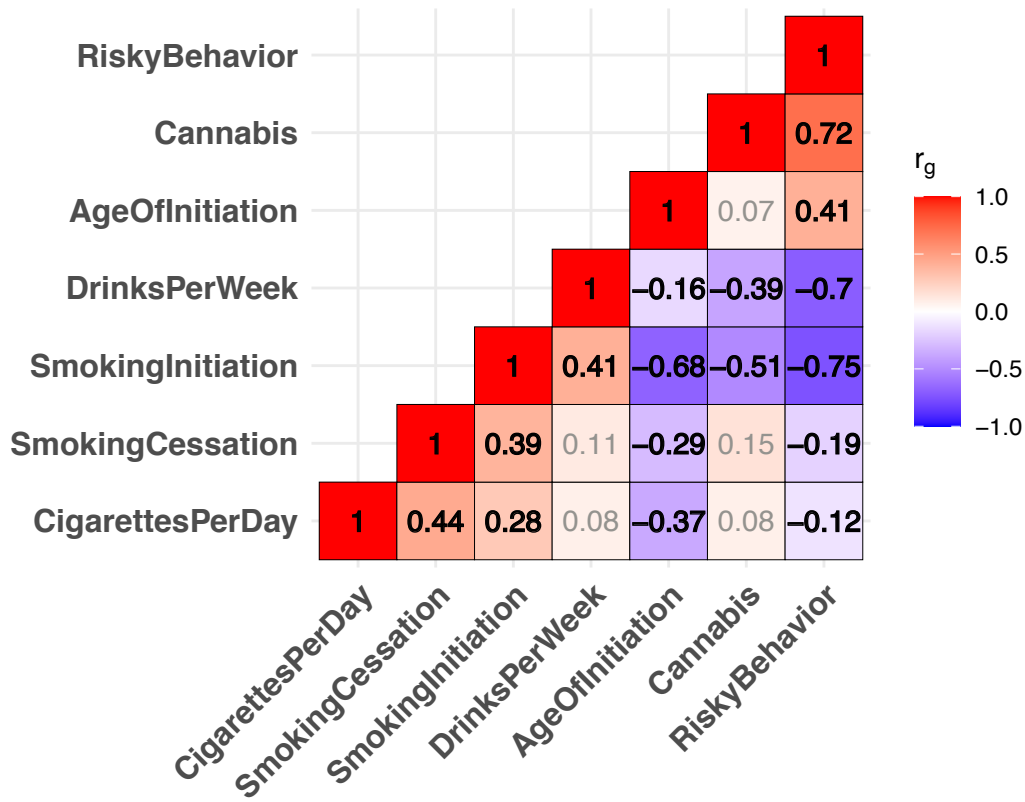

# B Shared & Unique Trait Loci

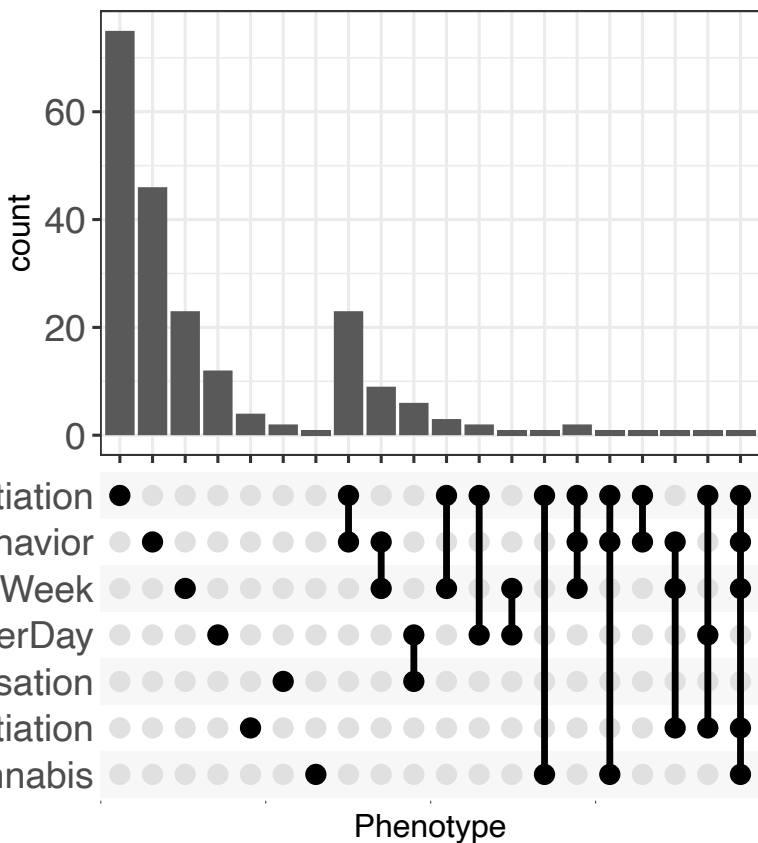

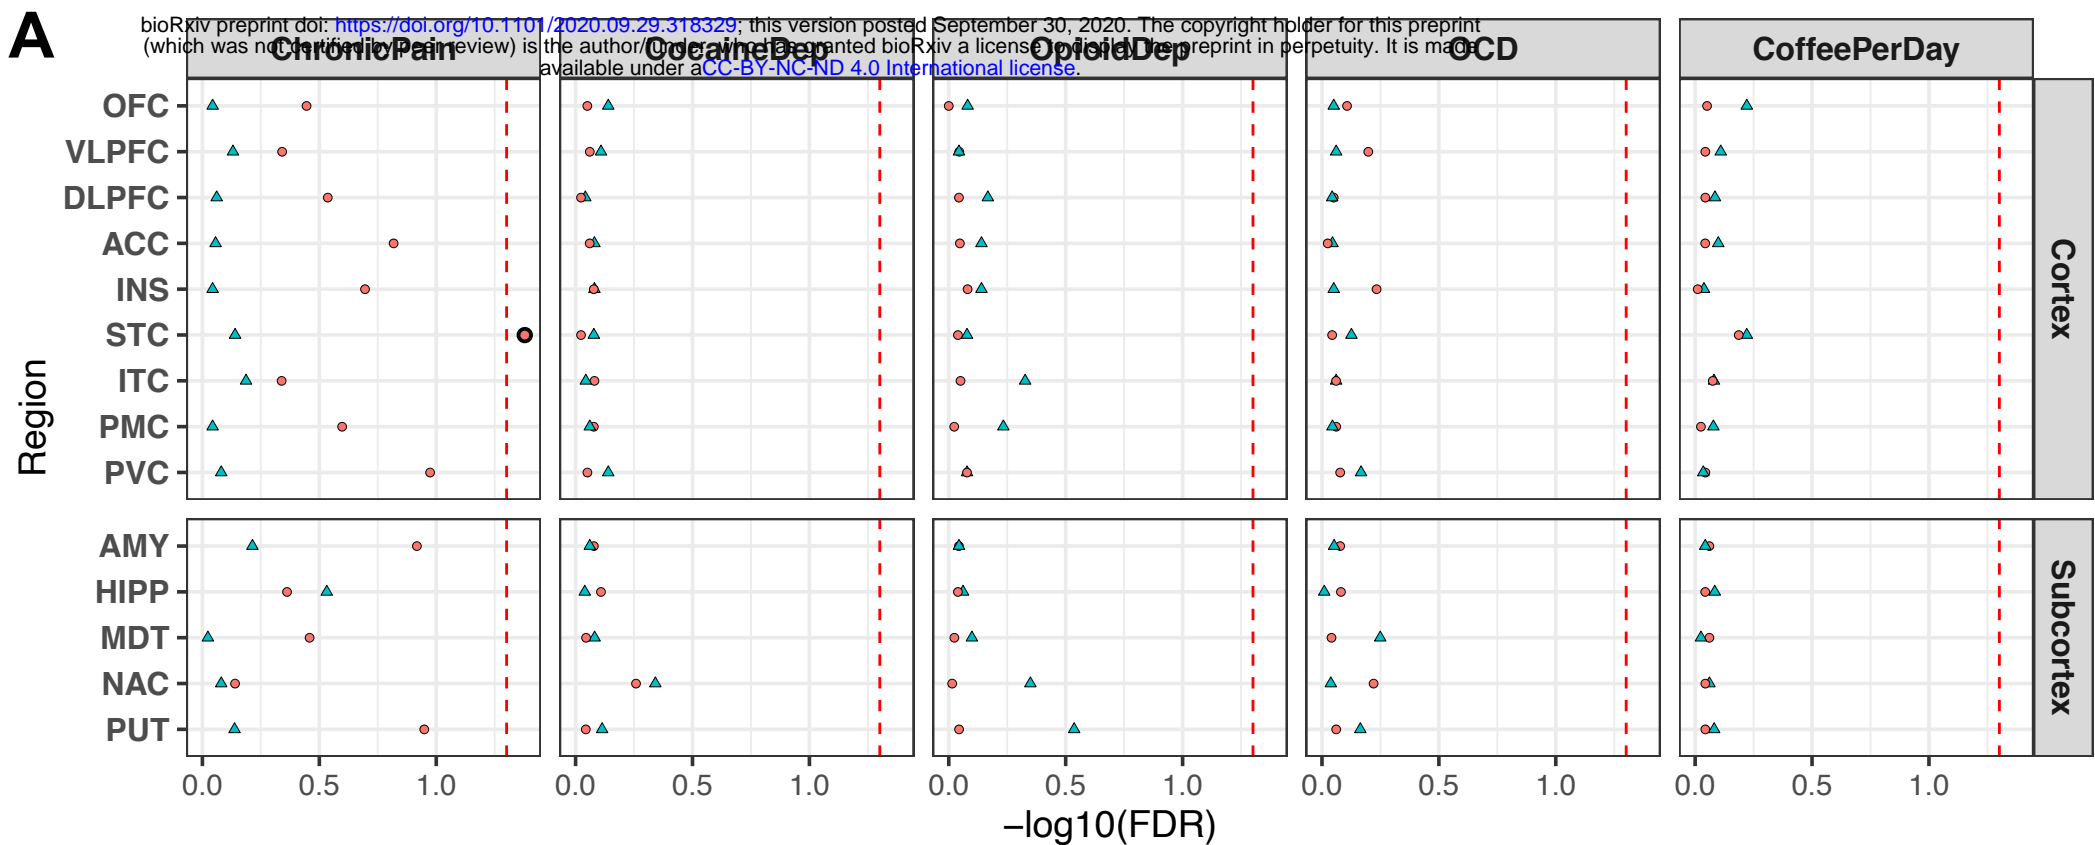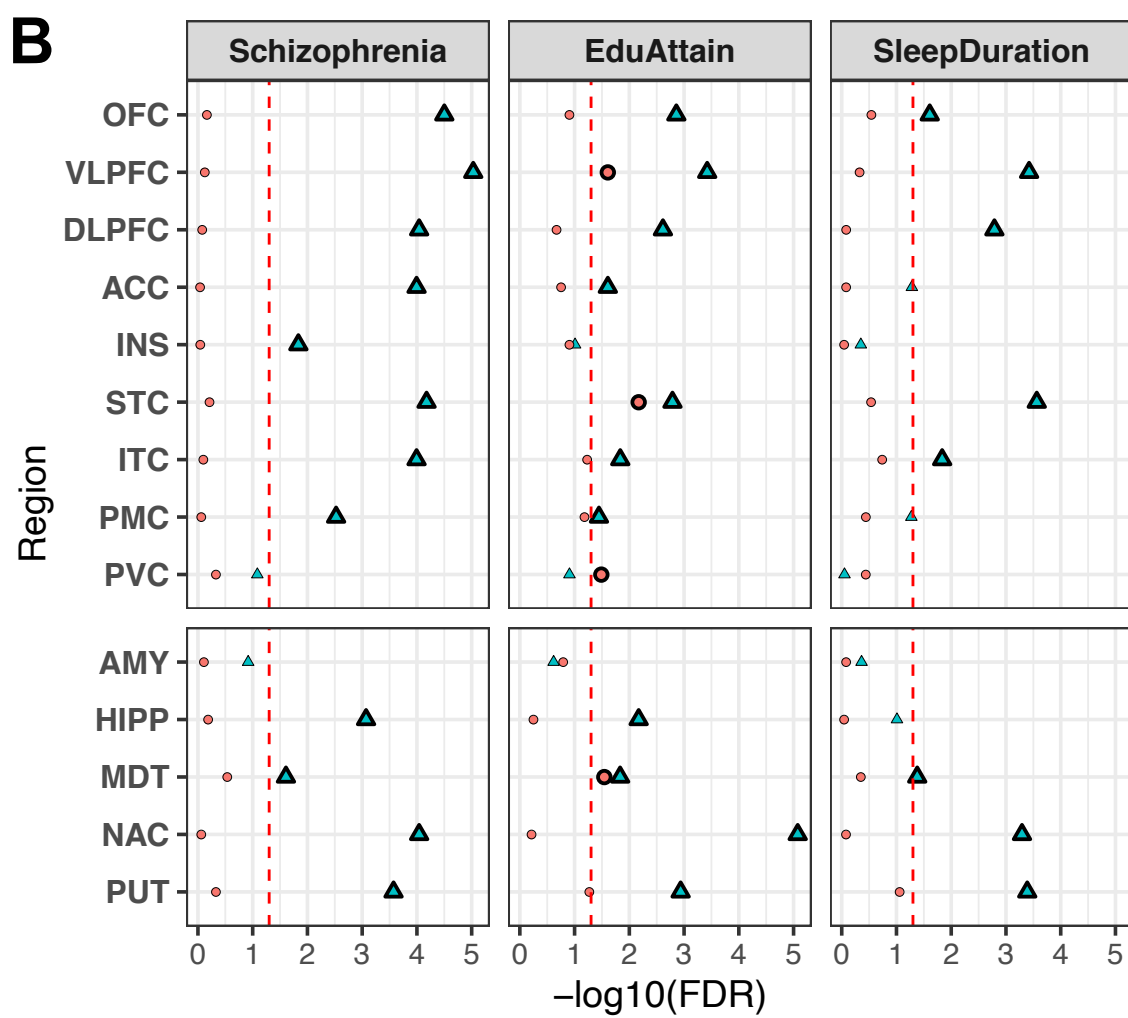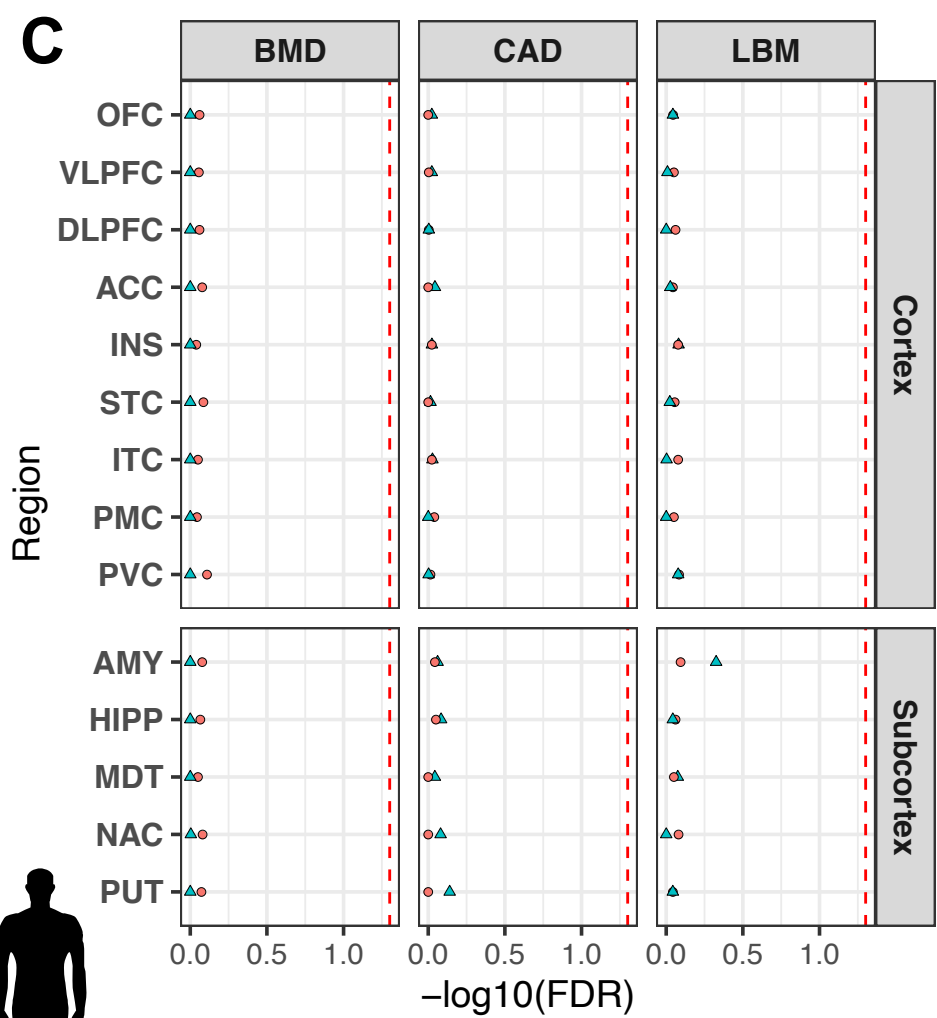

Celltype ● NeuN- ▲ NeuN+

Celltype ● NeuN- ▲ NeuN+

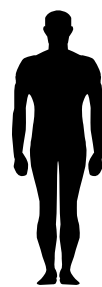



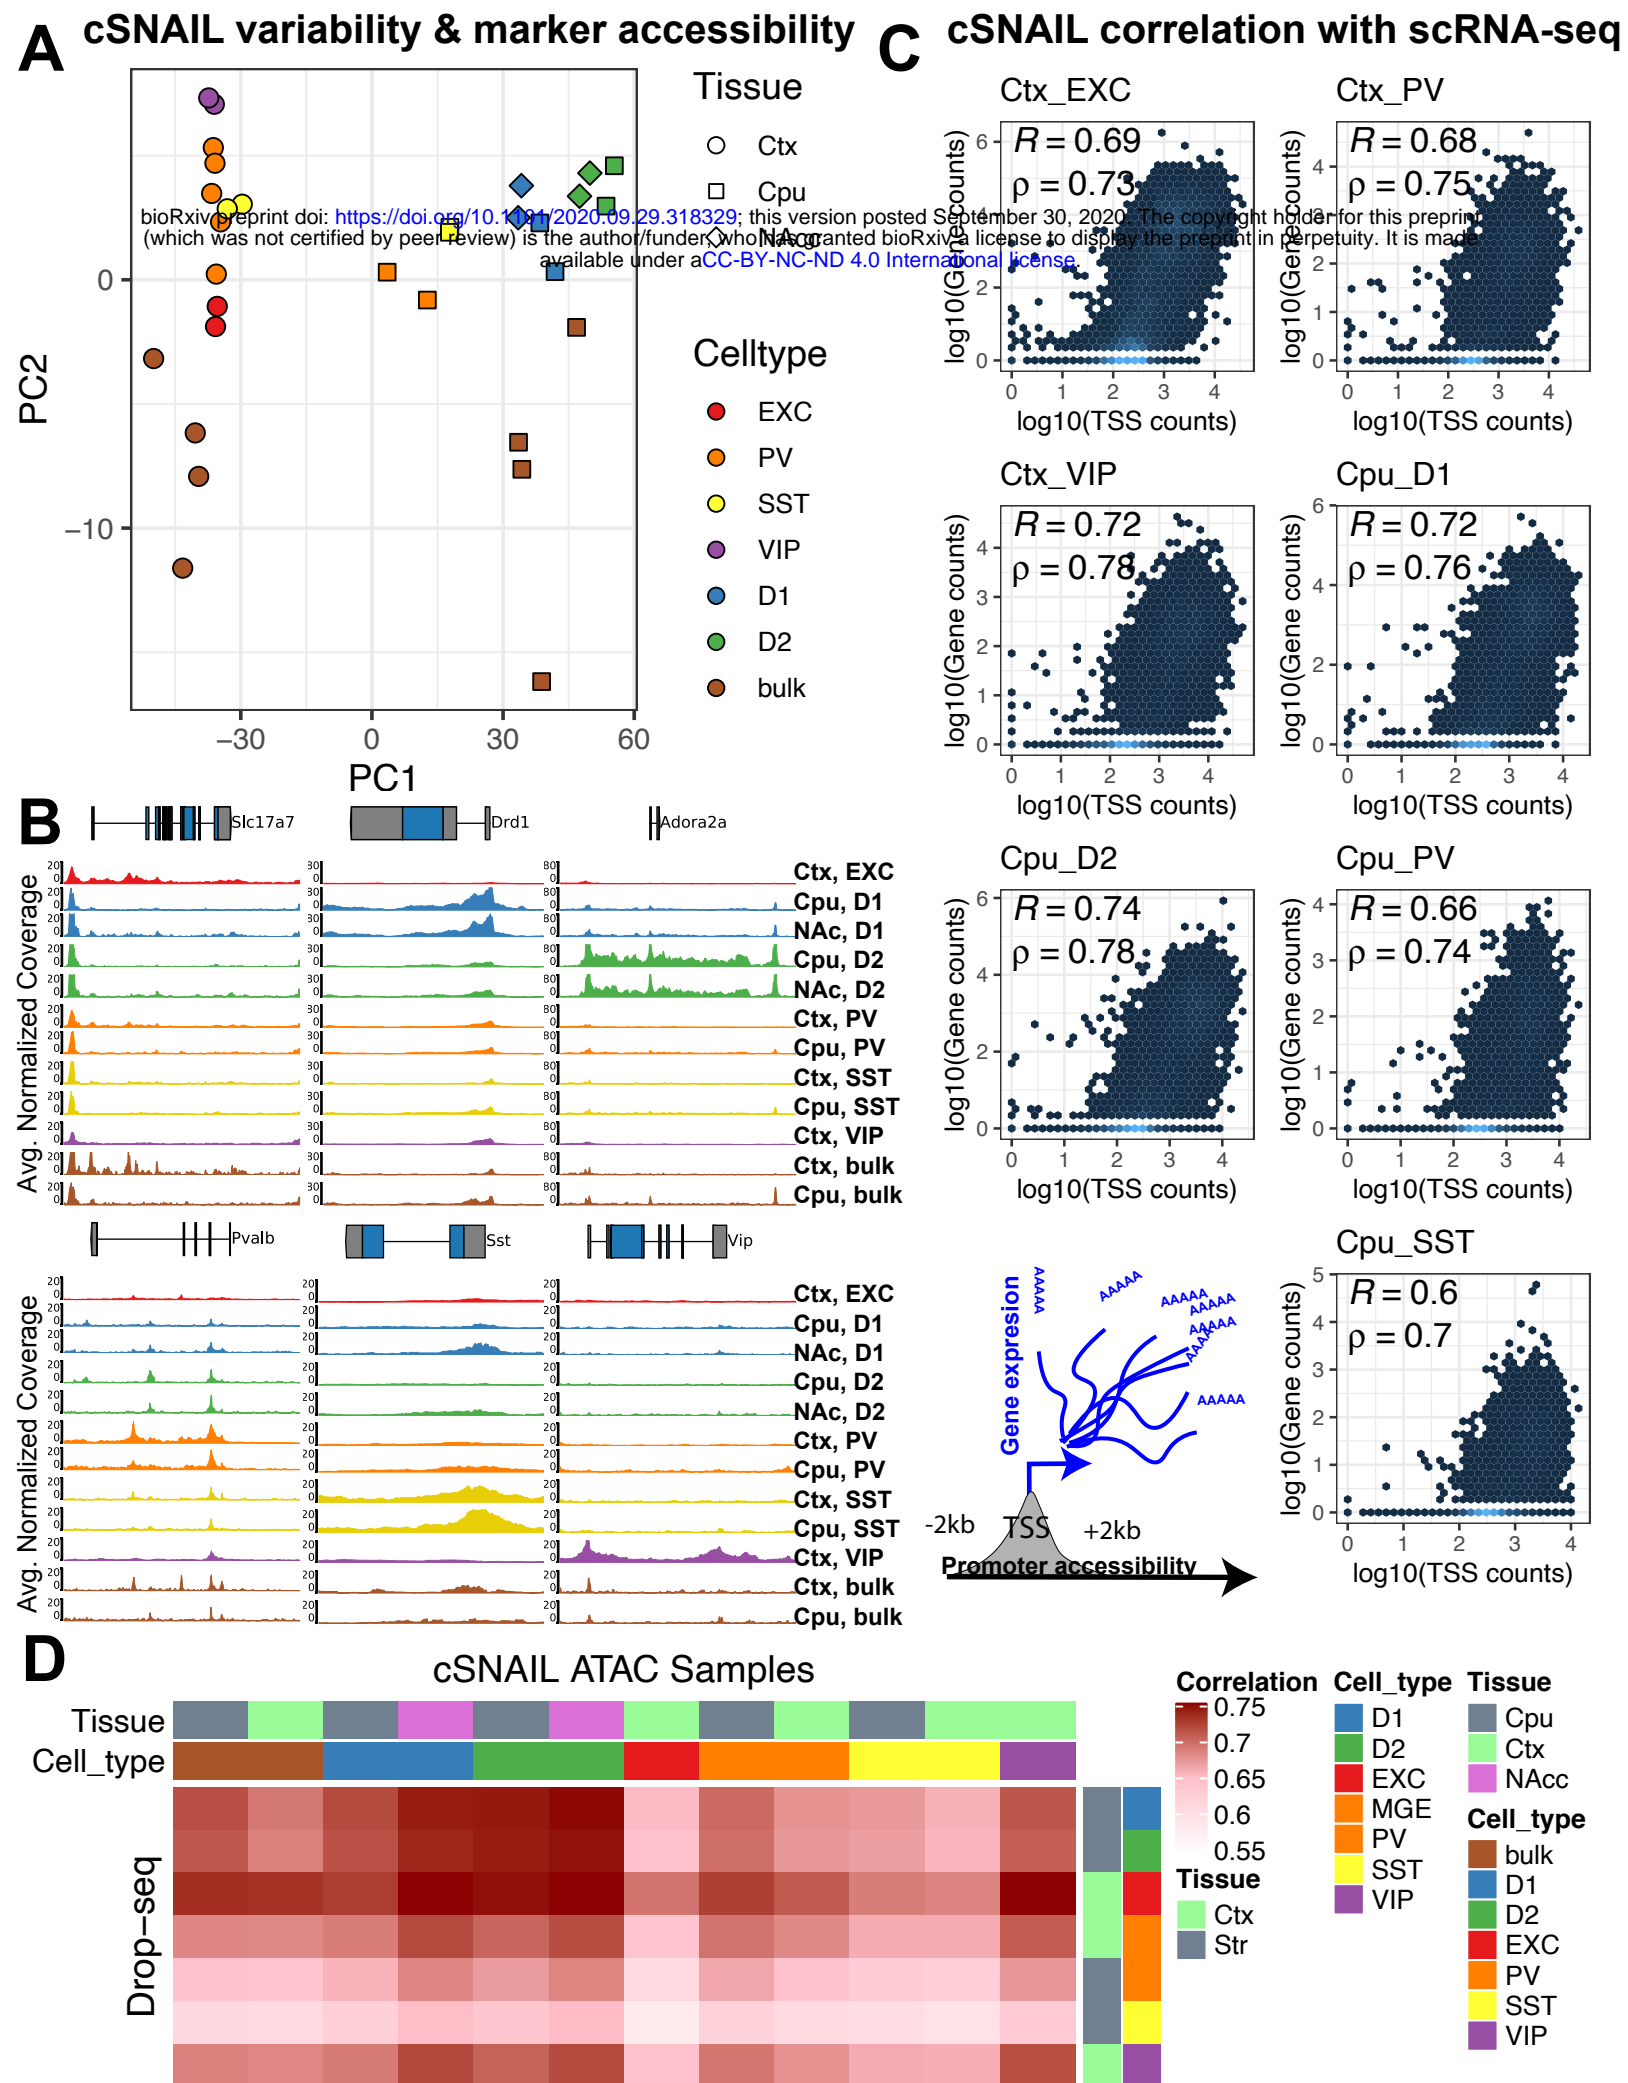

Supplemental Figure 3

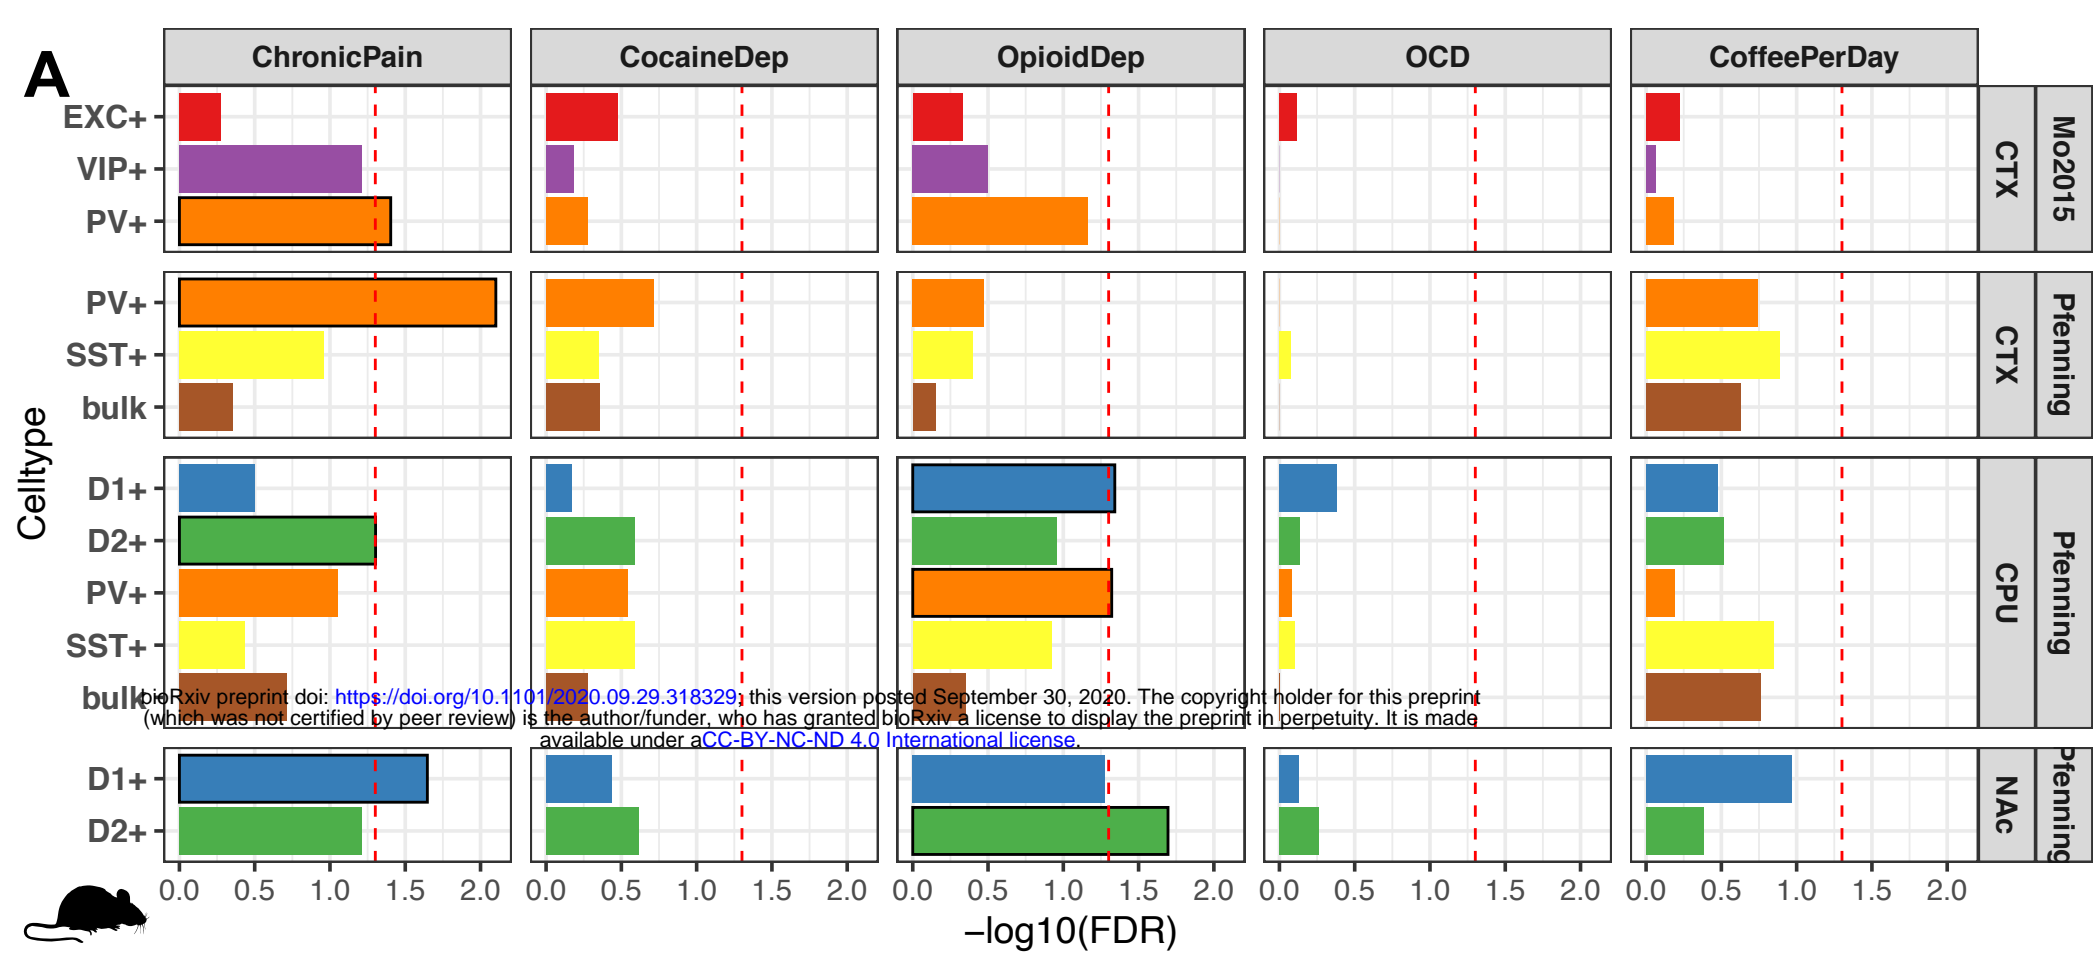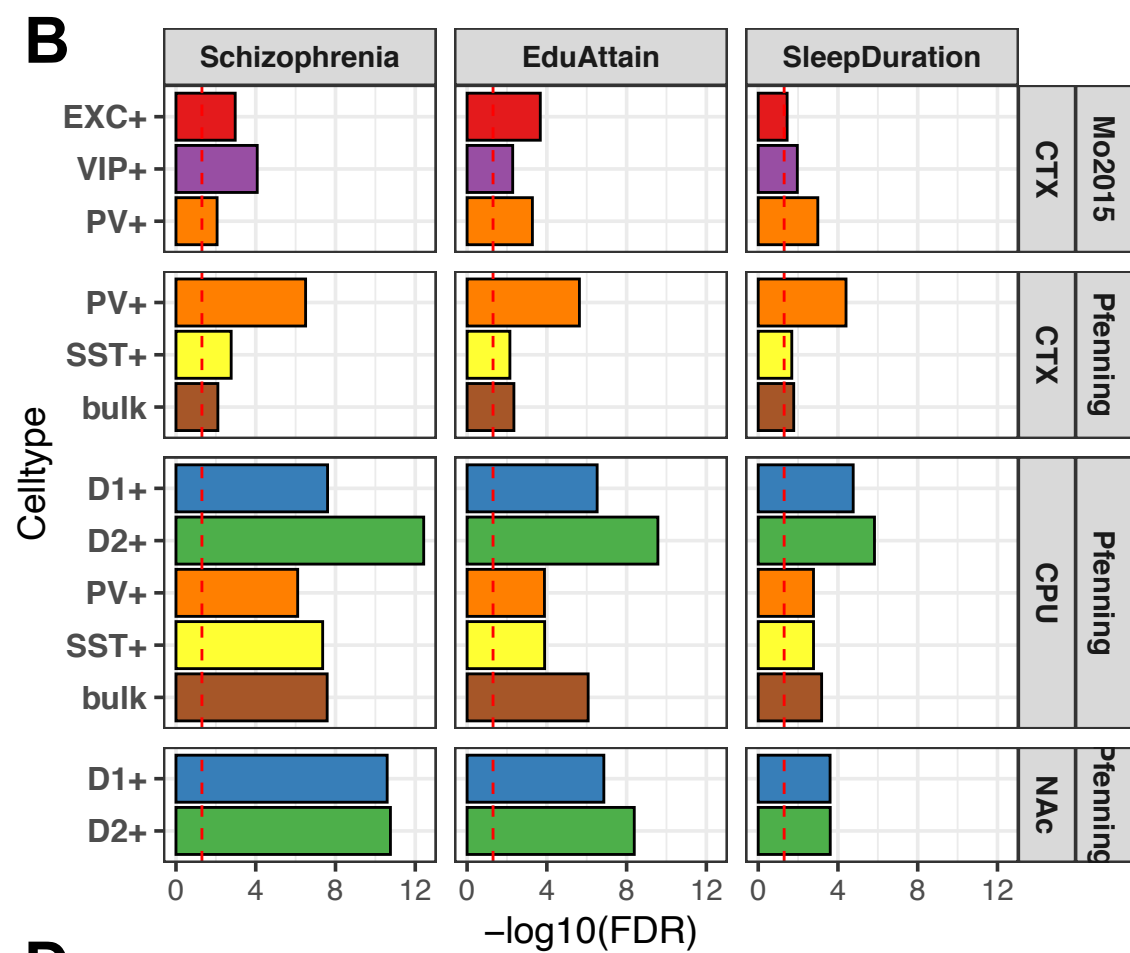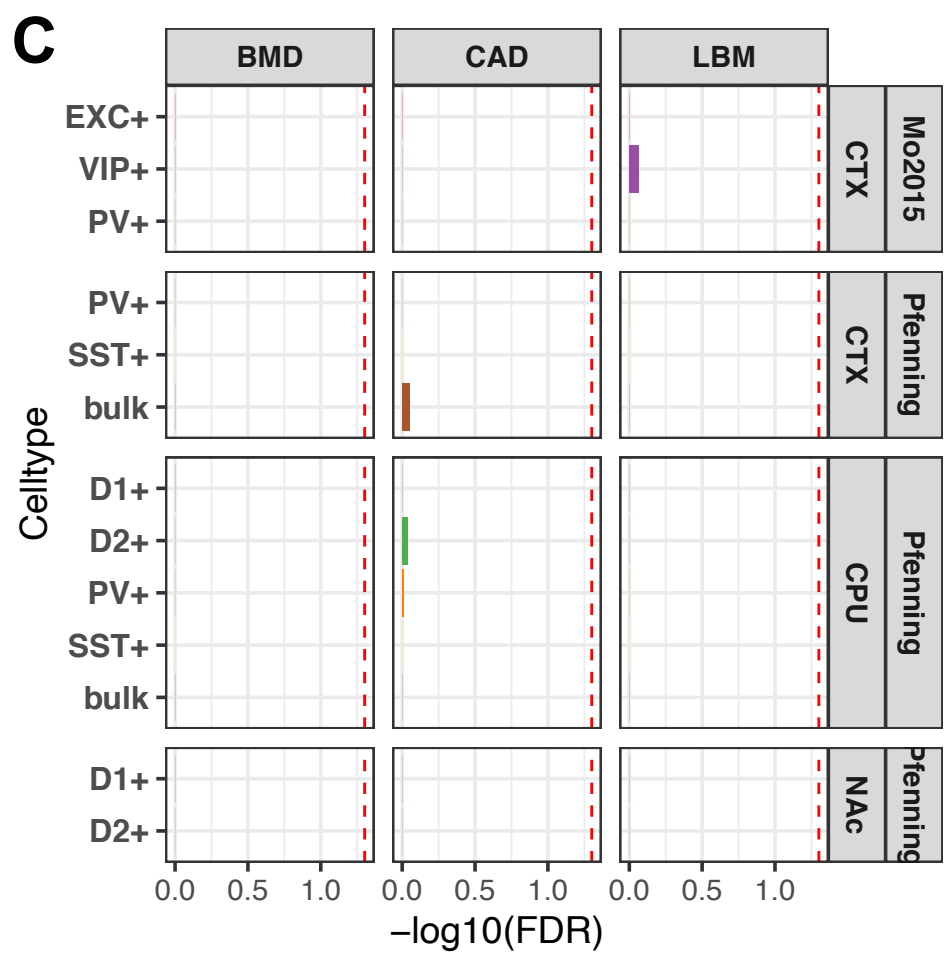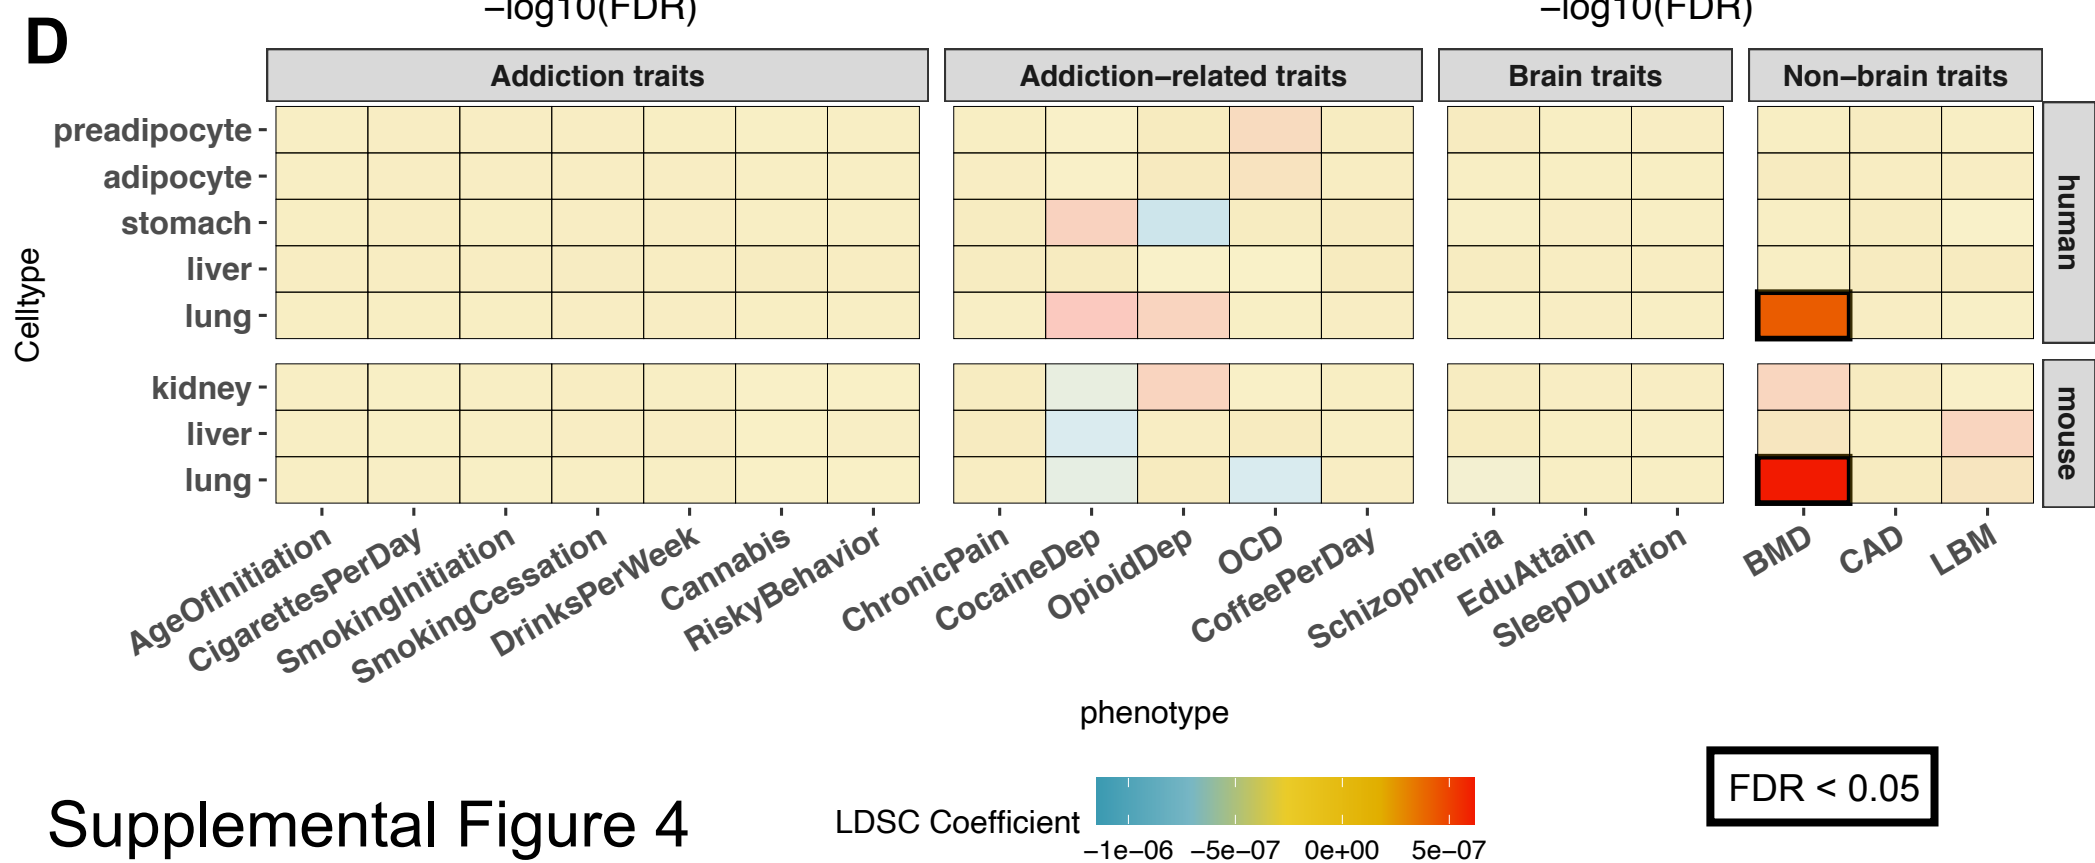

Supplemental Figure 4

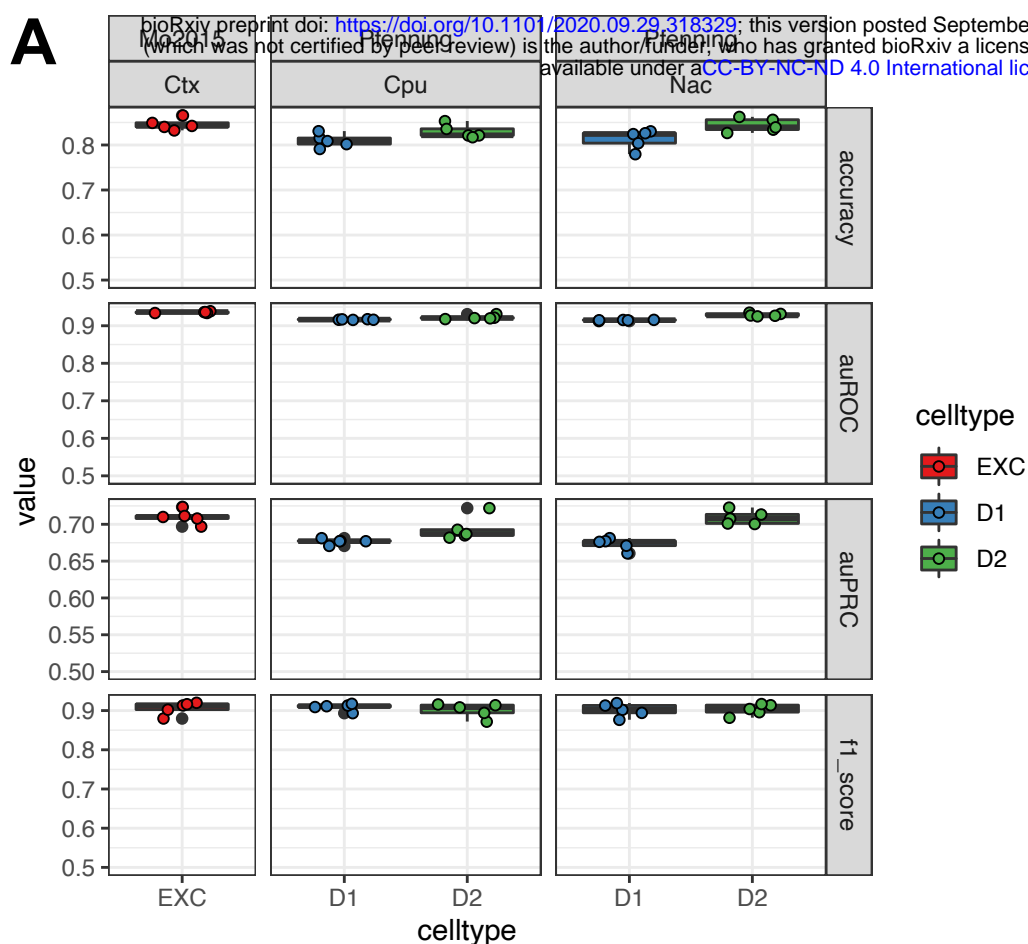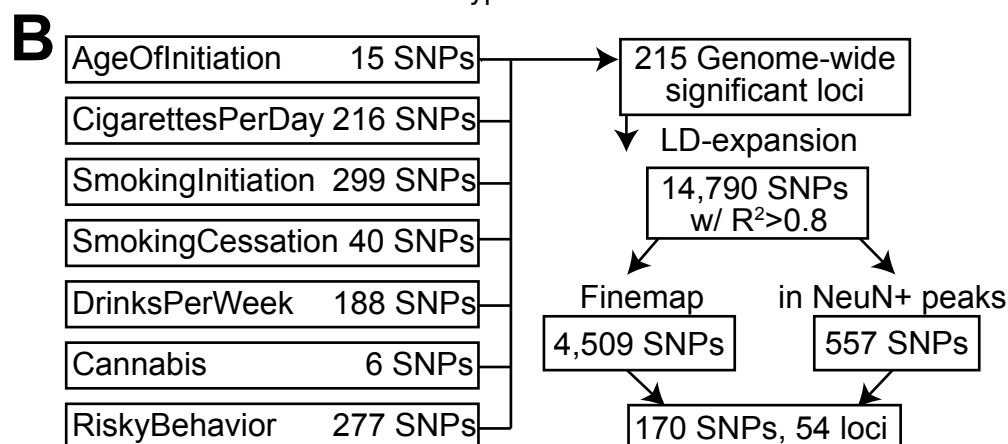

### ML-predicted candidate SNP selection criteria

SNP score cutoffs:

1) in cortical or striatal NeuN+\*  
\*depends on which ML model

2)  $\text{score}_{\text{risk allele}} > 0.5$  or  
 $\text{score}_{\text{non-risk allele}} > 0.5$

3)  $\text{delta} = \text{score}_{\text{risk}} - \text{score}_{\text{non-risk}}$   
 $\text{abs}(\text{delta}) > 0.05$

Models:

EXC 11 SNPs

D1 12 SNPs

D2 14 SNPs

26 SNPs  
16 loci

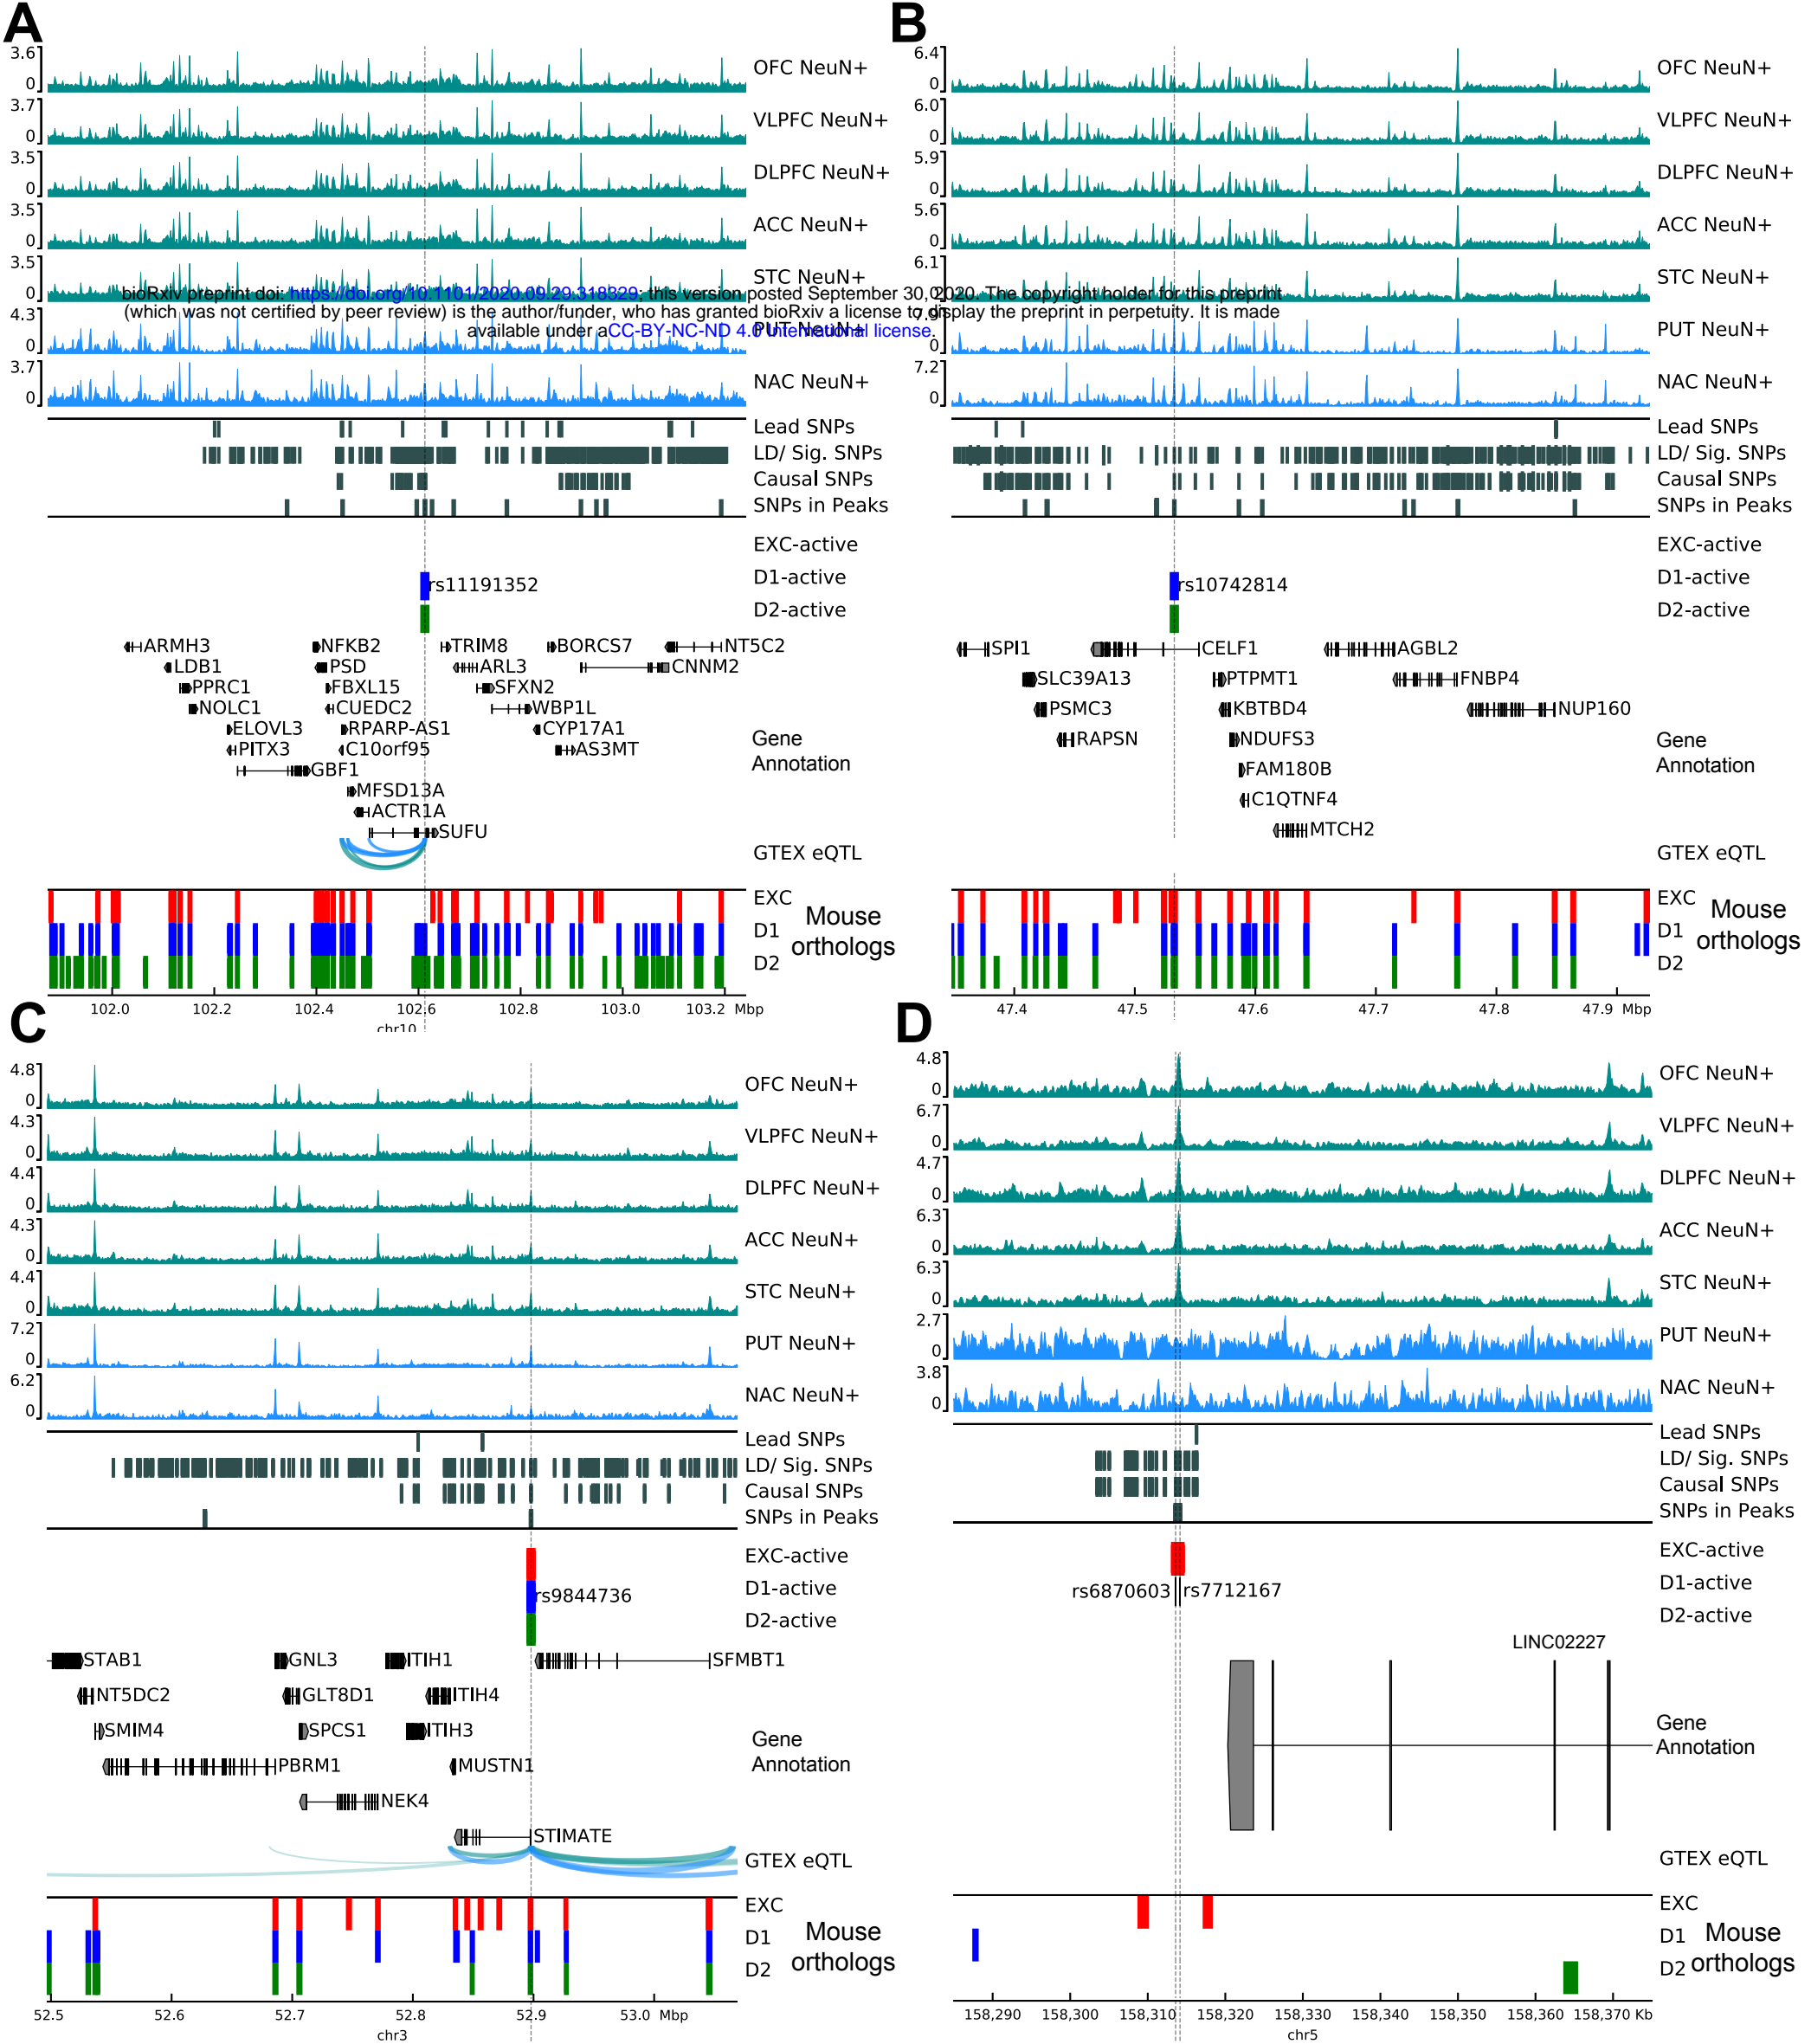

Supplemental Figure 6
